# Supplementary material for: An FeCl3-catalyzed three-component reaction for the synthesis of β-(1,2,3-triazolyl)-ketones using DMF as a one-carbon source
Source: Royal Society of Chemistry journal article supplement (doi:10.1039/d4ob00207e), 2024-01-01

*Supporting Information*

**An FeCl<sub>3</sub>-Catalyzed Three-Component Reaction for the  
Synthesis  $\beta$ -(1,2,3-Triazolyl) Ketones by Using DMF as One  
Carbon Source**

Ruilin Fang,<sup>a,‡</sup> Lei Zheng,<sup>a,b,‡</sup> Xuyang Chen,<sup>a</sup> Can Wang,<sup>\*a</sup> and Yunfeng Chen<sup>\*a</sup>

<sup>a</sup>School of Chemistry and Environmental Engineering, Wuhan Institute of Technology, Wuhan 430205, China; E-mail: chemwang@wit.edu.cn, yfchen@wit.edu.cn

<sup>b</sup>Department of Neuropharmacology and Novel Drug Discovery, School of Pharmaceutical Sciences, Southern Medical University, Guangzhou 510515, China.

‡These authors contributed equally to this work.

**Table of Contents**

|                                                                                                                |    |
|----------------------------------------------------------------------------------------------------------------|----|
| 1. General information .....                                                                                   | 2  |
| 2. The confirmation of <i>N</i> <sup>1</sup> and <i>N</i> <sup>2</sup> isomers of <b>3</b> and <b>3'</b> ..... | 3  |
| 3. Experimental Details .....                                                                                  | 4  |
| 3.1. Synthesis of <i>NH</i> -1,2,3-triazoles <b>1a~1g</b> in Table 1 .....                                     | 4  |
| 3.2. Synthesis of C-3 EWG substituted <i>NH</i> -1,2,3-triazoles in Table 2. ....                              | 5  |
| 3.3 General procedure for the synthesis of $\beta$ -(1,2,3-Triazolyl) Ketones .....                            | 13 |
| 4. Reference .....                                                                                             | 14 |
| 5. Characterization data of the $\beta$ -(1,2,3-triazolyl) ketones .....                                       | 15 |
| 6. NMR spectra .....                                                                                           | 37 |

## 1. General information

All reactions are basically carried out under air atmosphere. Unless otherwise noted, all commercial reagents and solvents were obtained from the commercial provider and used without further purification. Column chromatography was generally performed on silica gel (300~400 mesh), and reactions were monitored by thin layer chromatography (TLC) using UV light to visualize the course of the reactions. The  $^1\text{H}$  NMR (400 MHz) and  $^{13}\text{C}$  NMR (100 MHz) data were recorded on 400 M spectrometers using  $\text{CDCl}_3$  as solvent at room temperature. The chemical shifts ( $\delta$ ) are reported in ppm and coupling constants ( $J$ ) in Hz.  $^1\text{H}$  NMR spectra were recorded with  $\text{CDCl}_3$  ( $\delta = 7.26$  ppm) as internal reference, and  $^{13}\text{C}$  NMR spectra were recorded with  $\text{CDCl}_3$  ( $\delta = 77.00$  ppm) as internal reference.

## 2. The confirmation of $N^1$ and $N^2$ isomers of **3** and **3'**

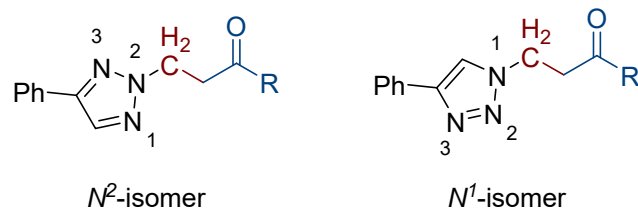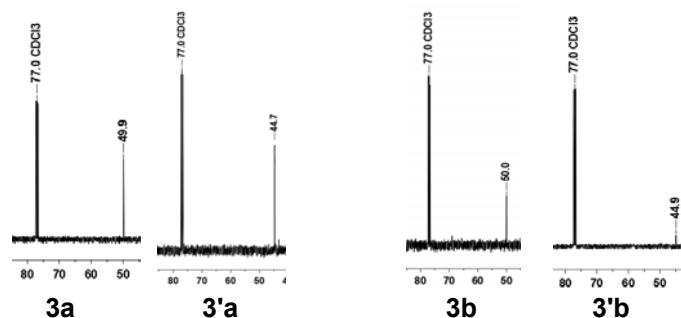

In general, the  $N^2$ -substituted products exhibited less polar than other isomers. The  $^{13}C$  NMR spectra of **3a** and **3'a** show significant differences between the  $CH_2$  groups attached to the 1,2,3-triazole moiety of the  $N^1$  (**3a**) and  $N^2$  (**3'a**) isomers. Specifically, the  $CH_2$  group in the  $N^2$ -isomer (**3a**) exhibited a chemical shift of 49.9 ppm, whereas the  $N^1$ -isomer's (**3'a**)  $CH_2$  group had a chemical shift of 44.7 ppm, indicating that it was located at a higher field than the  $N^2$ -isomer. This result was also observed in other products, such as **3b** and **3'b**.

### 3. Experimental Details

#### 3.1. Synthesis of *NH*-1,2,3-triazoles **1a**~**1g** in Table 1.

The *NH*-1,2,3-triazoles **1a**~**1f** were known compounds and prepared by literature.<sup>1</sup> For **1a**, **1b**, and **1c**, prepared from corresponding aldehydes and nitromethane or Nitroethane;<sup>1a</sup> For compounds **1d**~**1f**, prepared from the aldehydes and aromatic nitrile.<sup>1b</sup>

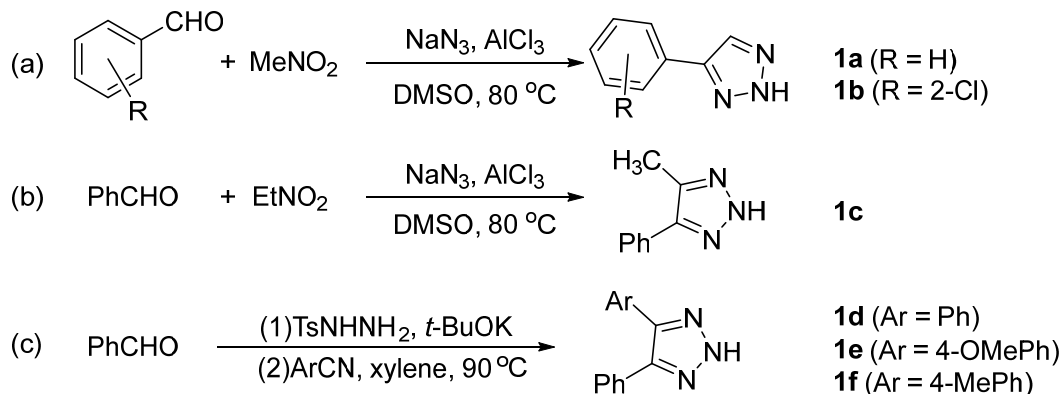

**4-pentyl-5-phenyl-2H-1,2,3-triazole (1g)** was prepared in two-step as shown below:

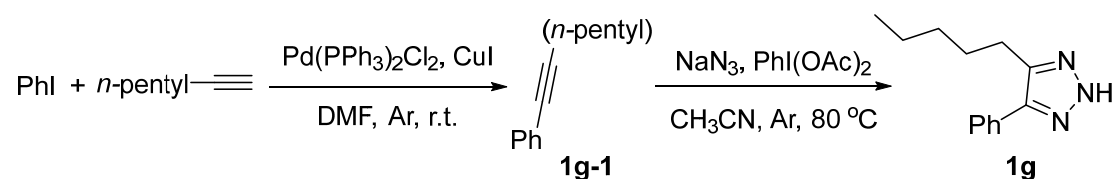

#### **4-pentyl-5-phenyl-2H-1,2,3-triazole (1g).**

**1g** was prepared from the sonogashira product hept-1-yn-1-ylbenzene (**1g-1**) and  $\text{NaN}_3$  under the oxidizing conditions, reported by Zhao's group, yields was not optimized.<sup>2</sup> White solid.  $^1\text{H NMR}$  (400 MHz,  $\text{DMSO-}d_6$ )  $\delta$  14.71 (s, 1H), 7.66 (d,  $J = 7.6$  Hz, 2H), 7.49 – 7.30 (m, 3H), 2.81 (t,  $J = 7.8$  Hz, 2H), 1.62 (p,  $J = 7.2$  Hz, 2H), 1.35 – 1.13 (m, 4H), 0.91 – 0.69 (m, 3H). **MS (ASAP)**  $m/z$ : calcd for  $\text{C}_{13}\text{H}_{17}\text{N}_3$   $[\text{M}+\text{H}]^+$ : 216.15, found, 216.08.

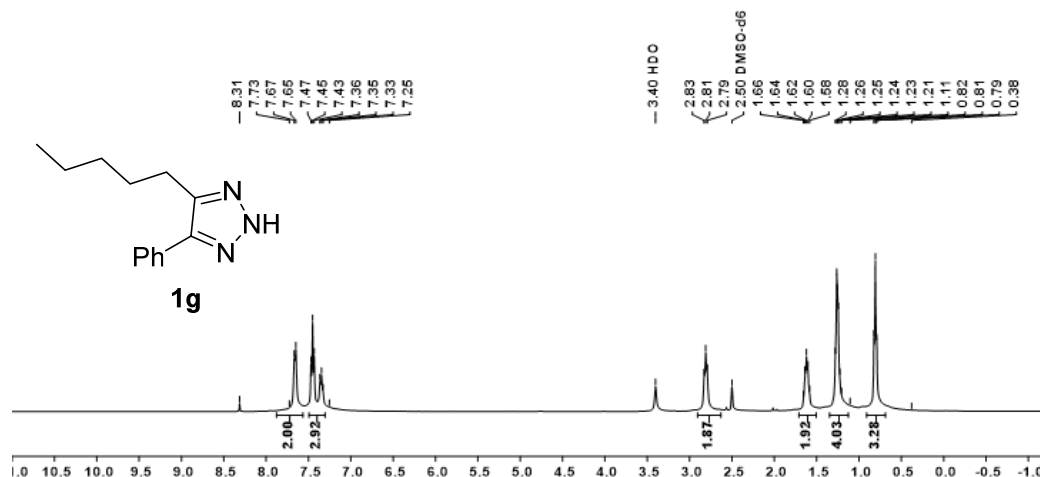

### 3.2. Synthesis of C-3 EWG substituted *NH*-1,2,3-triazoles in Table 2.

**1g~1m** were known compounds and prepared by literature.<sup>1a, 3</sup> For C-3 position halogen (Br, Cl, and I) substituted *NH*-1,2,3-triazoles **1g~1i**, prepared from **1a** and NXS (NBS, NCS, and NIS) in DCM.<sup>3a, 3b</sup> For C-3 position benzoyl compound **1j**, prepared from the chalcone and  $\text{NaN}_3$ .<sup>3c</sup> For ethyl ester **1k** and **1l**, prepared from aldehyde, ethyl nitroacetate and  $\text{NaN}_3$ .<sup>1a</sup> For C-3 position CN substituted *NH*-1,2,3-triazoles **1m**, prepared from aldehyde, 2-(phenylsulfonyl)acetonitrile and  $\text{NaN}_3$ .<sup>3d</sup>

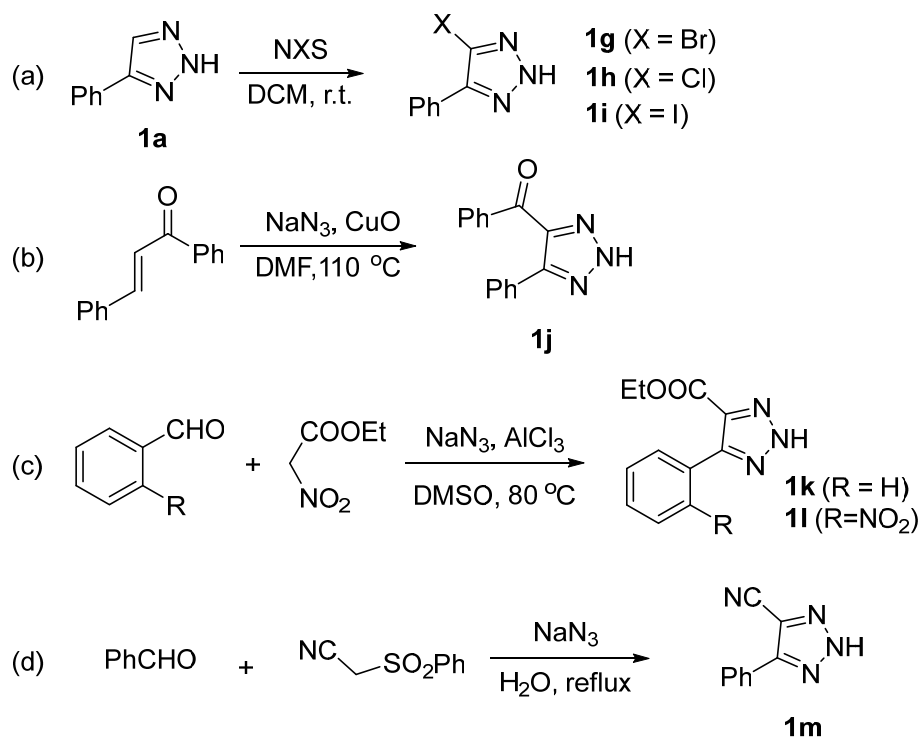

**4-nitro-5-phenyl-2H-1,2,3-triazole (1n)** was prepared in two-step as shown blow:

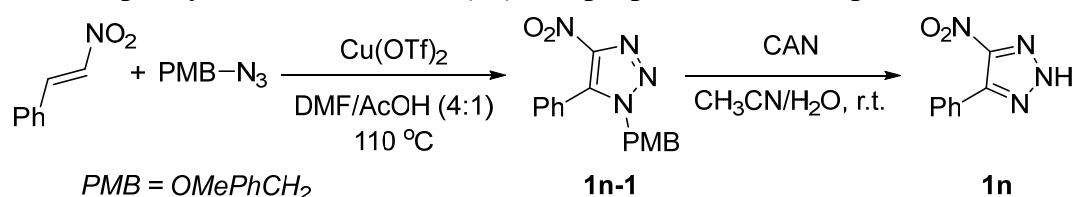

**1-(4-methoxybenzyl)-4-nitro-5-phenyl-1H-1,2,3-triazole (1n-1).**

The intermediate **1n-1** was prepared from copper-catalyzed [3+2] cycloaddition/oxidation reaction of nitro-olefins and organic azides as reported by Chen's group and yields was not optimized.<sup>4</sup> White solid. <sup>1</sup>H NMR (400 MHz, CDCl<sub>3</sub>) δ 7.62 – 7.54 (m, 1H), 7.51 (t, *J* = 7.2 Hz, 2H), 7.25 (s, 1H), 6.93 (d, *J* = 7.8 Hz, 2H), 6.77 (d, *J* = 7.6 Hz, 2H), 5.37 (s, 2H), 3.76 (s, 3H). <sup>13</sup>C NMR (100 MHz, CDCl<sub>3</sub>) δ 159.86, 135.39, 130.97, 129.58, 129.31, 128.96, 125.33, 123.66, 114.20, 55.22, 52.83. MS (ASAP) *m/z*: calcd for C<sub>16</sub>H<sub>14</sub>N<sub>4</sub>O<sub>3</sub> [M+H]<sup>+</sup>: 311.11, found, 310.92.

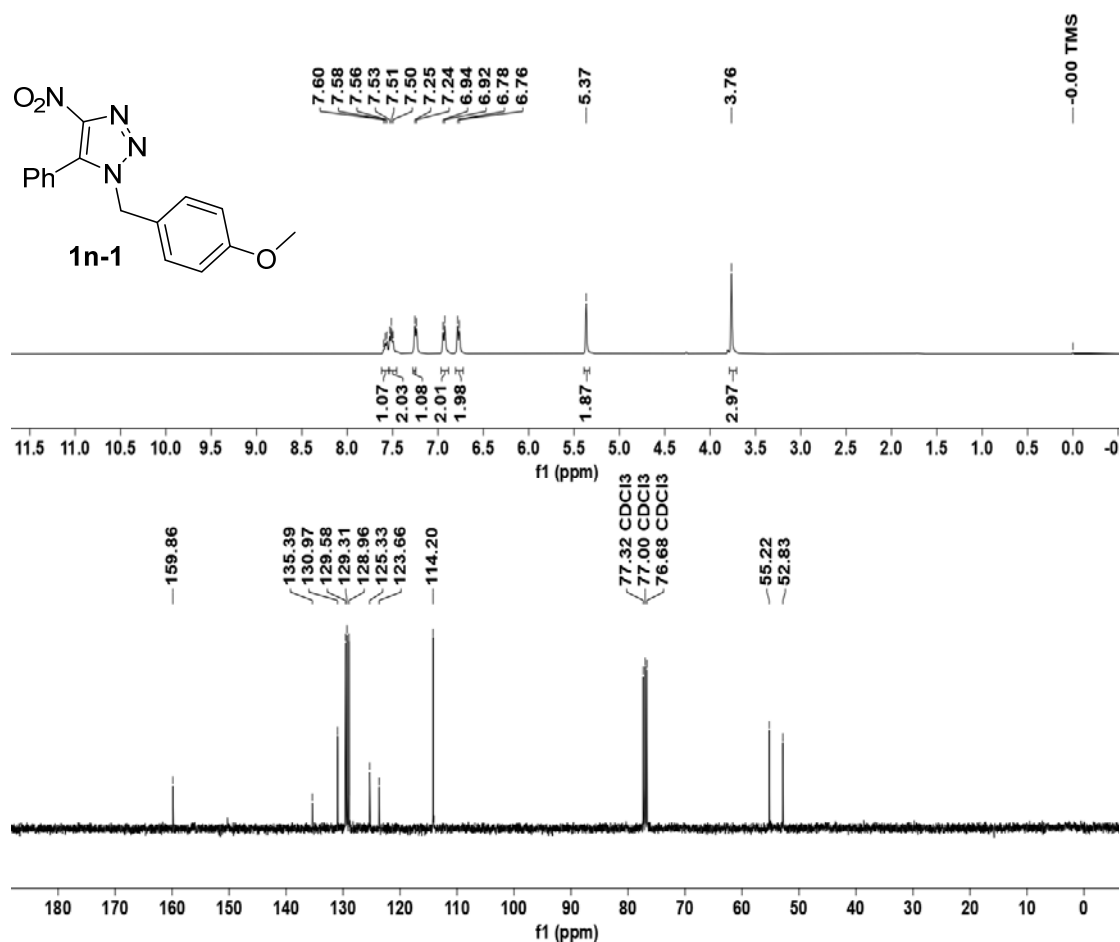

#### 4-nitro-5-phenyl-2H-1,2,3-triazole (**1n**).

**1n** was prepared from deprotection of the *N*<sup>1</sup>-PMB group of **1n-1**. Similar method was reported by Chen's group.<sup>5</sup> Yellow solid. <sup>1</sup>H NMR (500 MHz, MeOD) δ 7.78 – 7.65 (m, 2H), 7.60 – 7.45 (m, 3H), 4.98 (s, 1H). <sup>13</sup>C NMR (126 MHz, MeOD) δ 139.28, 131.6, 130.4, 129.6, 126.8. MS (ASAP) *m/z*: calcd for C<sub>8</sub>H<sub>6</sub>N<sub>4</sub>O<sub>2</sub> [M+H]<sup>+</sup>: 191.06, found, 191.03.

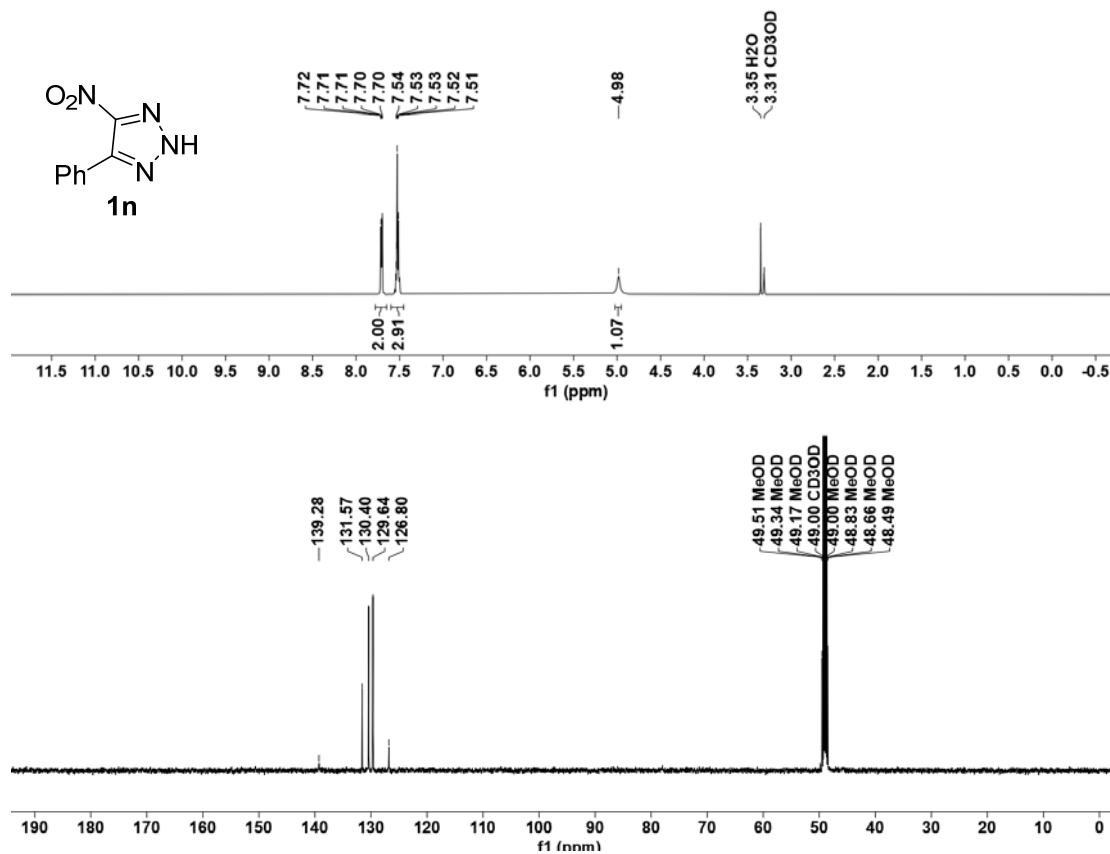

The 4-phenyl-5-(trifluoromethyl)-2H-1,2,3-triazole (**1o**) was prepared from **1i** in three-step as shown blow:

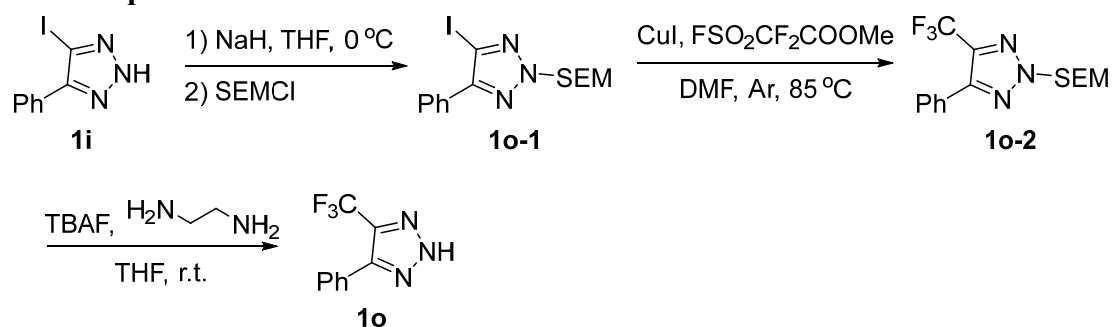

#### 4-iodo-5-phenyl-2-((2-(trimethylsilyl)ethoxy)methyl)-2H-1,2,3-triazole (**1o-1**).

To a solution of 4-iodo-5-phenyl-2H-1,2,3-triazole **1i** (542 mg, 2.0 mmol) in THF (5 mL) was added NaH (60% w/w in mineral oil, 96 mg, 2.4 mmol) at 0 °C. The mixture was stirred for 1 h and then a solution of SEMCl (500 mg, 3.0 mmol) in THF (0.5 mL) was added dropwise. The mixture was stirred for 24 h at room temperature. After the reaction was completed, the reaction mixture was quenched with water and extracted with EA. The organic phase was washed with brine, dried over anhydrous Na<sub>2</sub>SO<sub>4</sub>, and concentrated to give a crude product. The residue was purified by flash chromatography on silica gel (EA/hexane = 1/20) to afford the desired product as colourless oil (45%). <sup>1</sup>H NMR (400 MHz, CDCl<sub>3</sub>) δ 7.91 (d, *J* = 7.4 Hz, 2H), 7.51 – 7.41 (m, 3H), 5.69 (s, 2H), 3.72 (t, *J* = 8.0 Hz, 2H), 0.95 (t, *J* = 8.0 Hz, 2H), -0.01 (s, 9H). <sup>13</sup>C NMR (100 MHz, CDCl<sub>3</sub>) δ 150.55, 129.39, 129.01, 128.51, 127.78, 82.53, 67.89, 18.08, -1.44. MS (ASAP) *m/z*: calcd for C<sub>14</sub>H<sub>20</sub>IN<sub>3</sub>O<sub>2</sub>Si [M+H]<sup>+</sup>: 402.05, found, 402.05.

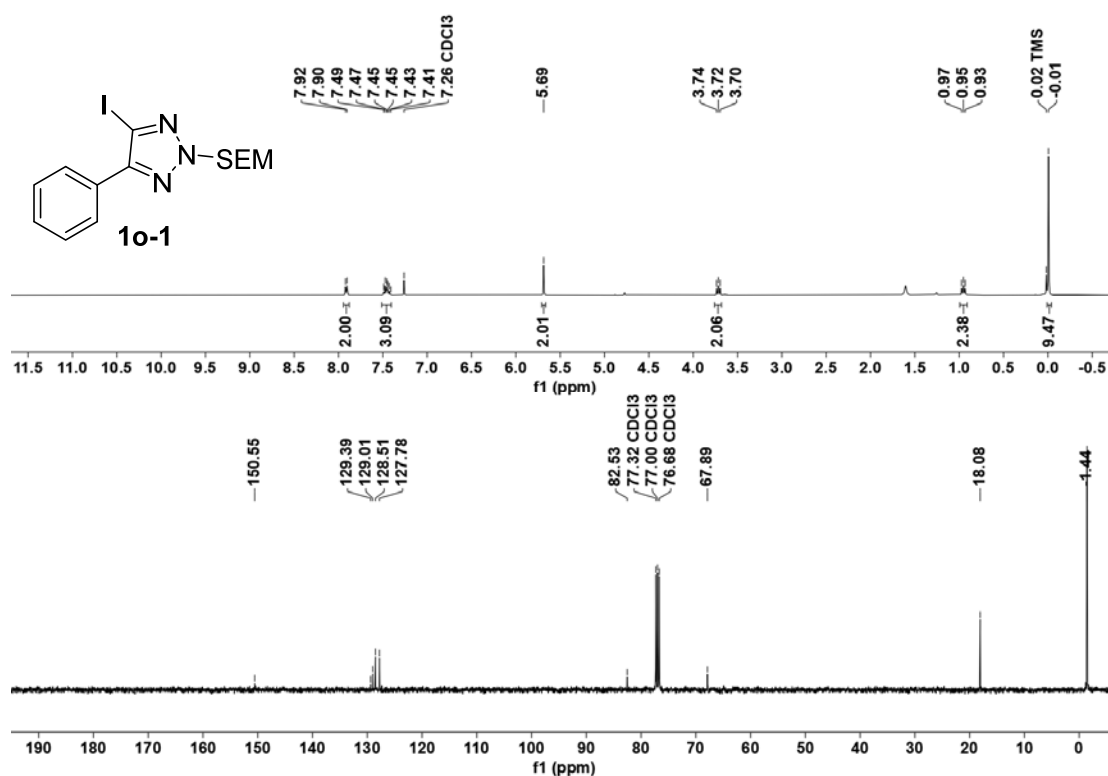



**4-phenyl-5-(trifluoromethyl)-2-((2-(trimethylsilyl)ethoxy)methyl)-2H-1,2,3-triazole (1o-2).**

To a solution of **1o-1** (1.0 mmol) and CuI (1.0 mmol) in DMF (4.0 mL) was added FSO<sub>2</sub>CF<sub>2</sub>COOMe (1.5 mmol) under N<sub>2</sub> atmosphere. The mixture was stirred at 80 °C for 2 h. After stirring at 80 °C for 2 h, the reaction mixture was quenched with water and extracted with EA (3 × 2.5 mL). The organic phase was washed with brine, dried, and concentrated. The residue was purified by silica gel column chromatography eluted with EA/hexane (v/v = 1/5) to afford **1o-2** as a yellow oil (75%). <sup>1</sup>H NMR (400 MHz, CDCl<sub>3</sub>) δ 7.75 – 7.69 (m, 2H), 7.52 – 7.44 (m, 3H), 5.74 (s, 2H), 3.75 (t, *J* = 8.0 Hz, 2H), 0.96 (t, *J* = 8.2 Hz, 2H), 0.00 (s, 9H). <sup>13</sup>C NMR (100 MHz, CDCl<sub>3</sub>) δ 146.98, 129.57, 128.71, 128.28, 120.92 (d, *J* = 267.0 Hz), 82.93, 68.27, 17.62, -1.50. MS (ASAP) *m/z*: calcd for C<sub>15</sub>H<sub>20</sub>F<sub>3</sub>N<sub>3</sub>OSi [M+H]<sup>+</sup>: 344.14, found, 344.01.

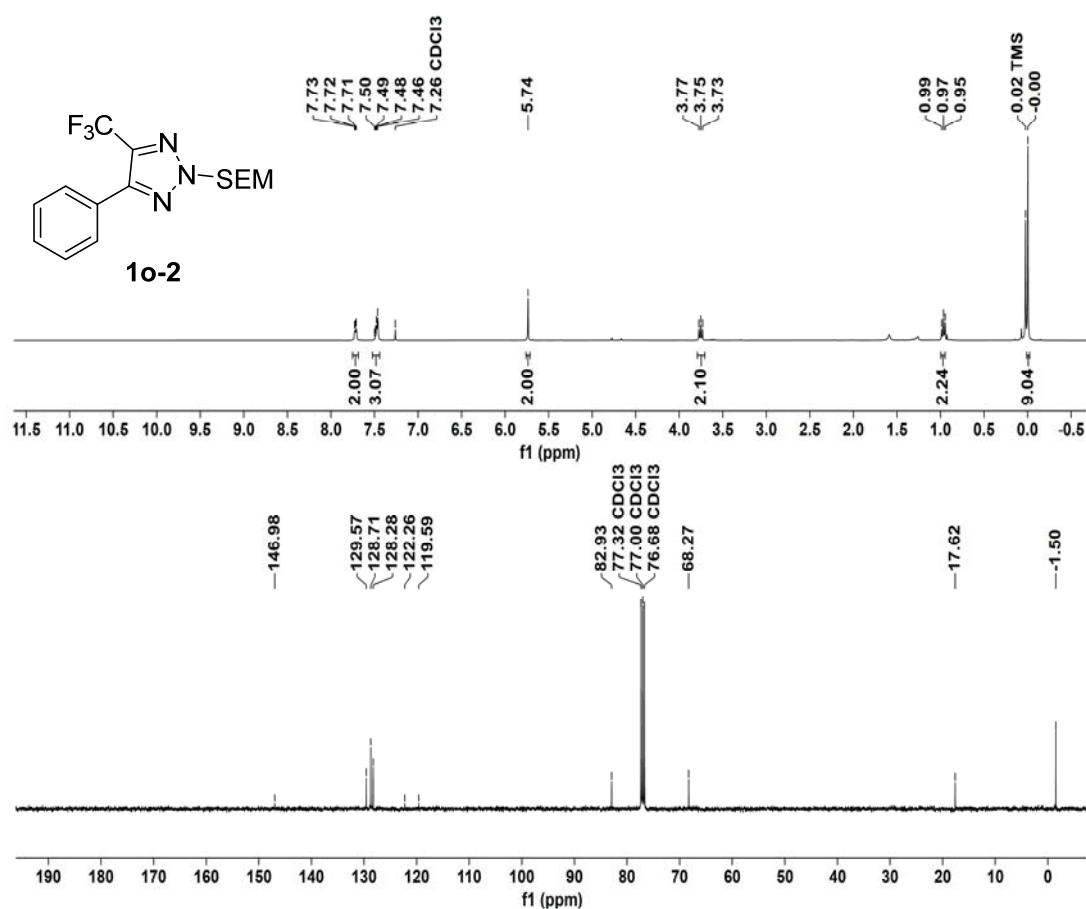

#### 4-phenyl-5-(trifluoromethyl)-2H-1,2,3-triazole (**1o**)

To a solution of **1o-2** (1.0 mmol) in THF (4.0 mL) was added TBAF (2.0 mmol). The mixture was stirred at 65 °C for 2 h. Then, a solution of ethane-1,2-diamine in THF (4.0 M, 0.25 mL) was added. After stirring at room temperature for 24 h, the reaction mixture was quenched with water and extracted with EA (3 × 4 mL). The organic phase was washed with brine, dried over anhydrous Na<sub>2</sub>SO<sub>4</sub>, and concentrated in vacuo. The residue was purified by silica gel column chromatography eluted with EA/hexane (v/v = 1/5) to afford **1o** as a white solid (95% yield). <sup>1</sup>H NMR (400 MHz, CDCl<sub>3</sub>) δ 7.69 – 7.63 (m, 2H), 7.48 – 7.45 (m, 3H). <sup>13</sup>C NMR (100 MHz, CDCl<sub>3</sub>) δ 129.81, 128.85, 128.72, 128.33, 127.29, 121.16 (d, *J* = 269.4 Hz). MS (ASAP) *m/z*: calcd for C<sub>9</sub>H<sub>6</sub>F<sub>3</sub>N<sub>3</sub> [M+H]<sup>+</sup>: 214.06, found, 214.01. Spectral data match those previously reported in the literature.<sup>6</sup>

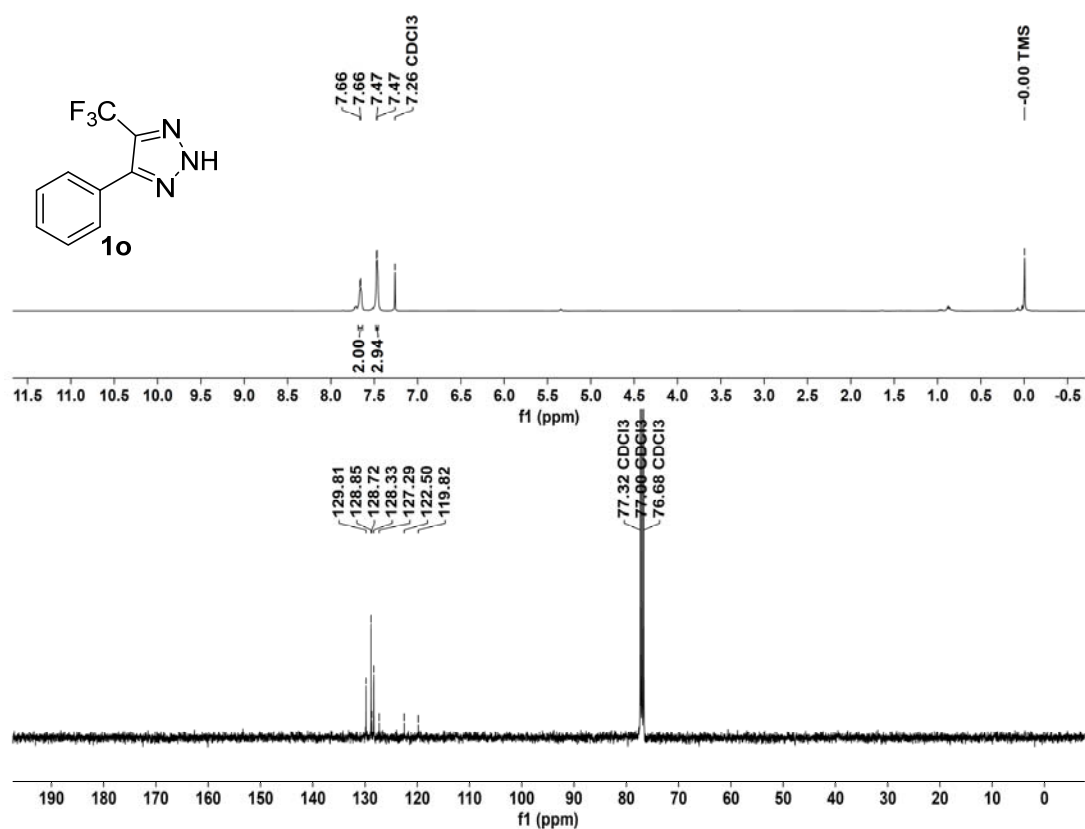

The 4-(ethylsulfonyl)-5-phenyl-2H-1,2,3-triazole (**1p**) was prepared in two-step from **1o-1** as shown below:

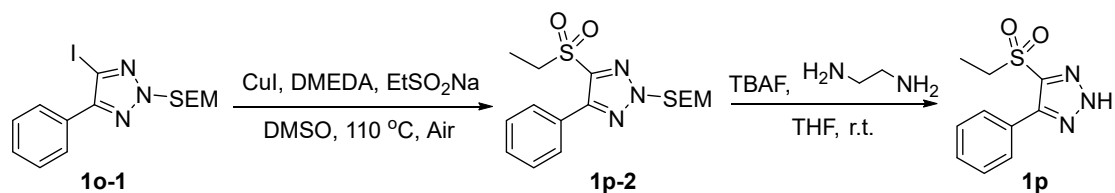

#### 4-(ethylsulfonyl)-5-phenyl-2-((2-(trimethylsilyl)ethoxy)methyl)-2H-1,2,3-triazole (**1p-2**).

The synthesis of **1p-2** was prepared from **1o-1** and EtSO<sub>2</sub>Na following a modified literature procedure.<sup>7</sup> To a solution of **1o-1** (201 mg, 0.5 mmol), CuI (9.5 mg, 50 μmol) and EtSO<sub>2</sub>Na (116 mg, 1 mmol) in DMSO (2.5 mL) was added EMEDA (6.6 mg, 75 μmol). The mixture was stirred at 110 °C under air conditions for 24 h. The reaction mixture was quenched with water and extracted with EA (3 × 4 mL). The organic phase was washed with brine, dried over anhydrous Na<sub>2</sub>SO<sub>4</sub>, and concentrated in vacuo. The residue was purified by silica gel column chromatography eluted with EA/hexane (v/v = 1/2) to afford **1p-2** as a white solid (65% yield). <sup>1</sup>H NMR (400 MHz, CDCl<sub>3</sub>) δ 7.97 – 7.91 (m, 2H), 7.48 (d, *J* = 3.9 Hz, 3H), 5.76 (s, 2H), 3.76 (t, *J* = 8.0 Hz, 2H), 3.37 (q, *J* = 7.4 Hz, 2H), 1.35 (t, *J* = 7.4 Hz, 3H), 0.97 (t, *J* = 7.4 Hz, 2H), 0.00 (s, 9H). <sup>13</sup>C NMR (100 MHz, CDCl<sub>3</sub>) δ 129.96, 129.14, 128.63, 83.33, 68.52, 49.82, 17.67, 6.95, -1.46. MS (ASAP) *m/z*: calcd for C<sub>16</sub>H<sub>25</sub>N<sub>3</sub>O<sub>3</sub>SSi [M+H]<sup>+</sup>: 368.15, found, 368.09.

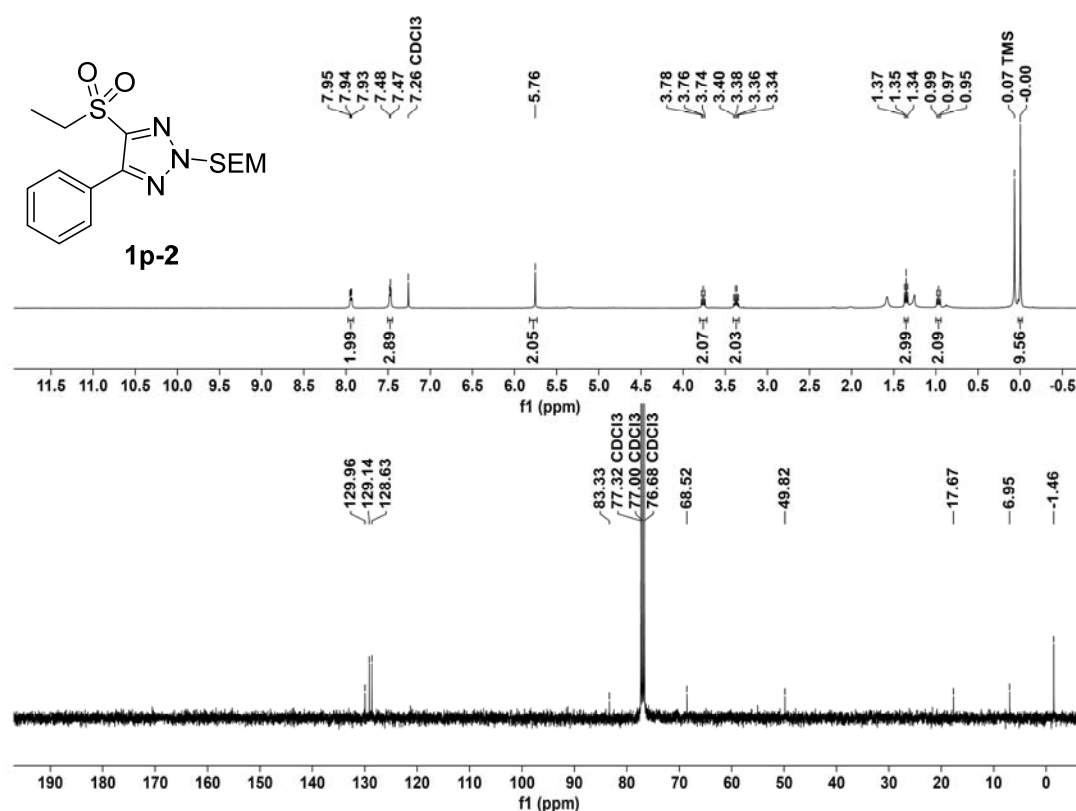

#### 4-(ethylsulfonyl)-5-phenyl-2H-1,2,3-triazole (1p)

**1p** was prepared from N<sup>2</sup>-SEM deprotection of **1p-2** in a similar manner as described for **1o**. White solid. <sup>1</sup>H NMR (400 MHz, DMSO-*d*<sub>6</sub>) δ 7.79 (d, *J* = 6.9 Hz, 2H), 7.47 (q, *J* = 6.6 Hz, 3H), 3.39 (t, *J* = 7.2 Hz, 2H), 1.16 (t, *J* = 7.2 Hz, 3H). <sup>13</sup>C NMR (100 MHz, DMSO-*d*<sub>6</sub>) δ 142.39, 140.76, 129.22, 129.10, 128.42, 128.06, 49.56, 7.09. MS (ASAP) *m/z*: calcd for C<sub>10</sub>H<sub>11</sub>N<sub>3</sub>O<sub>2</sub>S [M+H]<sup>+</sup>: 238.06, found, 238.03.

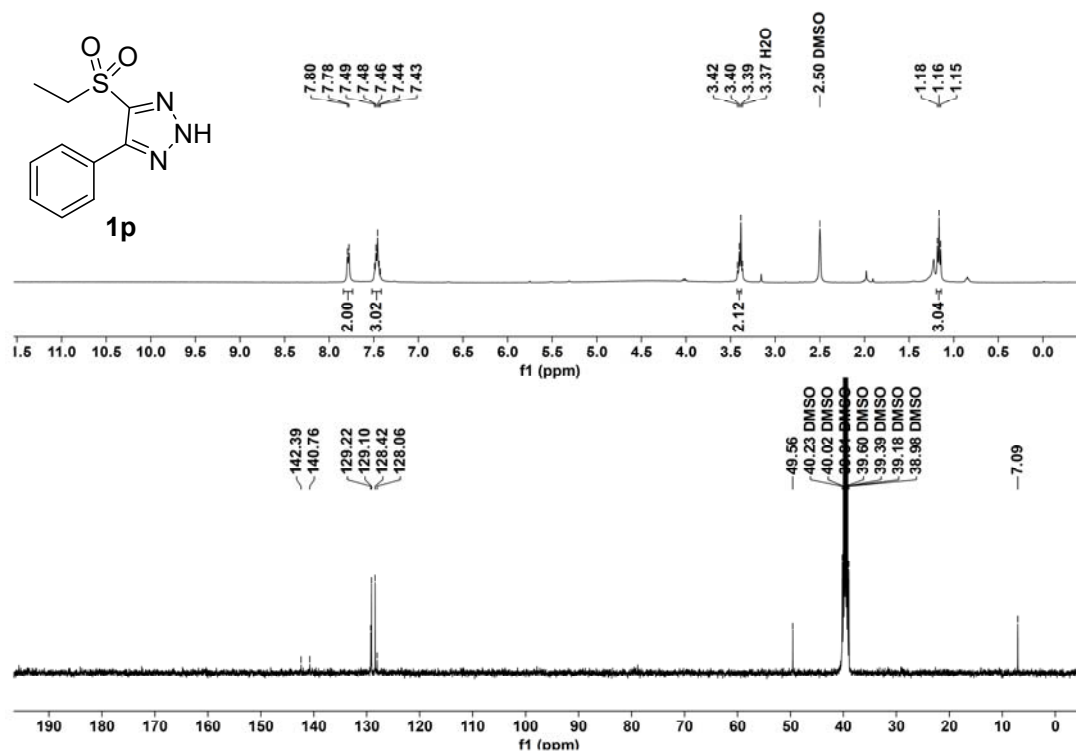

### 3.3 General procedure for the synthesis of $\beta$ -(1,2,3-Triazolyl) Ketones

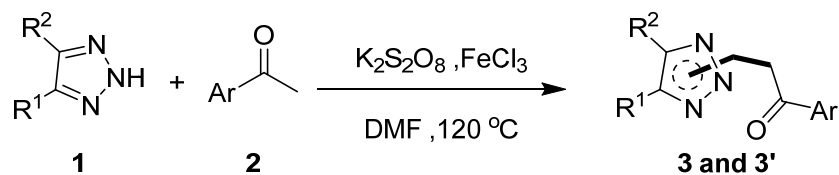

To a solution of *NH*-1,2,3-triazole **1** (1.0 mmol), **2** (1.2 mmol) and  $\text{FeCl}_3$  (0.1 mmol) in 5.0 mL DMF was added potassium persulfate (2.0 mmol). The mixture was stirred at  $120\text{ }^\circ\text{C}$  under air for 7 hours. After the reaction was completed, the mixture was poured into water, extracted with ethyl acetate, washed with saturated brine and dried over anhydrous  $\text{Na}_2\text{SO}_4$ . Remove the solvent in vacuum and purified by silica gel column chromatography (petroleum ether/ethyl acetate as eluent) to obtain the products **3** and **3'**.

## 4. Reference

1. (a) Q. Hu, Y. Liu, X. Deng, Y. Li and Y. Chen, *Adv. Synth. Catal.*, 2016, **358**, 1689-1693; (b) S. Qiu, Y. Chen, X. Song, L. Liu, X. Liu and L. Wu, *Synlett*, 2021, **32**, 86-90.
2. L. Hu, C. Mück, T. Wang, G. He, M. Gao and J. Zhao, *Chem. Eur. J.*, 2016, **22**, 911-915.
3. (a) X. Deng, X. Lei, G. Nie, L. Jia, Y. Li and Y. Chen, *J. Org. Chem.*, 2017, **82**, 6163-6171; (b) Q. Huang, M. Zheng, S. Yang, C. Kuang, C. Yu and Q. Yang, *Eur. J. Med. Chem.*, 2011, **46**, 5680-5687; (c) Y. Zhang, X. Li, J. Li, J. Chen, X. Meng, M. Zhao and B. Chen, *Org. Lett.*, 2012, **14**, 26-29; (d) T. Ponpandian and S. Muthusubramanian, *Tetrahedron Lett.*, 2012, **53**, 59-63.
4. Y. Chen, G. Nie, Q. Zhang, S. Ma, H. Li and Q. Hu, *Org. Lett.*, 2015, **17**, 1118-1121.
5. L. Zheng, T. Yi, R. Fang, Z. Zhou, C. Wang and Y. Chen, *Org. Chem. Front.*, 2023, **10**, 5260-5264.
6. D. Greif, U. Eilitz, M. Pulst, D. Riedel and M. Wecks, *J. Fluorine. Chem.*, 1999, **94**, 91-103.
7. J. M. Baskin and Z. Wang, *Org. Lett.*, 2002, **4**, 4423-4425.

## 5. Characterization data of the $\beta$ -(1,2,3-triazolyl) ketones

### 1-phenyl-3-(4-phenyl-2H-1,2,3-triazol-2-yl)propan-1-one (**3a**)

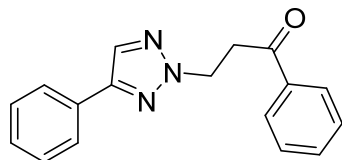

White solid (149.7 mg, 54%), m.p. 83-84 °C,  $R_f$  = 0.6 (petroleum/ethyl acetate = 5:1),  $^1\text{H NMR}$  (400 MHz,  $\text{CDCl}_3$ )  $\delta$  8.05 – 7.92 (m, 2H), 7.83 (s, 1H), 7.80 – 7.72 (m, 2H), 7.61 – 7.55 (m, 1H), 7.47 (t,  $J$  = 7.7 Hz, 2H), 7.41 (t,  $J$  = 7.7 Hz, 2H), 7.37 – 7.30 (m, 1H), 4.93 (t,  $J$  = 7.2 Hz, 2H), 3.74 (t,  $J$  = 7.2 Hz, 2H).  $^{13}\text{C NMR}$  (100 MHz,  $\text{CDCl}_3$ )  $\delta$  196.6, 147.8, 136.3, 133.5, 130.9, 130.3, 128.8, 128.7, 128.3, 128.0, 125.8, 49.9, 37.9. **HRMS** (ESI-MS)  $m/z$   $[\text{M}+\text{H}]^+$  calcd for  $\text{C}_{17}\text{H}_{15}\text{N}_3\text{O}+\text{H}^+$ : 278.1288, found: 278.1288.

### 1-phenyl-3-(4-phenyl-1H-1,2,3-triazol-1-yl)propan-1-one (**3'a**)

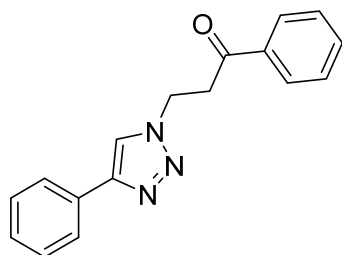

Yellow solid (91.5 mg, 33%), m.p. 112-113 °C,  $R_f$  = 0.2 (petroleum/ethyl acetate = 5:1),  $^1\text{H NMR}$  (400 MHz,  $\text{CDCl}_3$ )  $\delta$  7.94 (s, 1H), 7.93 – 7.89 (m, 2H), 7.83 – 7.77 (m, 2H), 7.58 – 7.52 (m, 1H), 7.45 (m, 2H), 7.41 – 7.36 (m, 2H), 7.32 – 7.27 (m, 1H), 4.83 (t,  $J$  = 6.2 Hz, 2H), 3.66 (t,  $J$  = 6.2 Hz, 2H).  $^{13}\text{C NMR}$  (100 MHz,  $\text{CDCl}_3$ )  $\delta$  196.5, 147.4, 135.8, 133.7, 130.5, 128.7, 128.6, 128.0, 127.9, 125.6, 121.0, 44.7, 38.6. **HRMS** (ESI-MS)  $m/z$   $[\text{M}+\text{H}]^+$  calcd for  $\text{C}_{17}\text{H}_{15}\text{N}_3\text{O}+\text{H}^+$ : 278.1288, found: 278.1289.

### 3-(4-phenyl-2H-1,2,3-triazol-2-yl)-1-(p-tolyl)propan-1-one (**3b**)

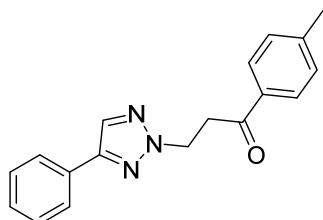

White solid (177.7 mg, 61%), m.p. 90-91 °C,  $R_f$  = 0.6 (petroleum/ethyl acetate = 5:1),  $^1\text{H NMR}$  (400 MHz,  $\text{CDCl}_3$ )  $\delta$  7.93 – 7.85 (m, 2H), 7.83 (s, 1H), 7.80 – 7.72 (m, 2H), 7.46 – 7.37 (m, 2H), 7.37 – 7.31 (m, 1H), 7.29 – 7.22 (m, 2H), 4.92 (t,  $J$  = 7.3 Hz, 2H), 3.72 (t,  $J$  = 7.3 Hz, 2H), 2.41 (s, 3H).  $^{13}\text{C NMR}$  (100 MHz,  $\text{CDCl}_3$ )  $\delta$  195.9, 147.4,

144.0, 133.5, 130.6, 130.0, 129.0, 128.5, 128.0, 127.8, 125.5, 49.7, 37.5, 21.3. **HRMS** (ESI-MS)  $m/z$   $[M+H]^+$  calcd for  $C_{18}H_{17}N_3O+H^+$ : 292.1444, found: 292.1443.

3-(4-phenyl-1H-1,2,3-triazol-1-yl)-1-(p-tolyl)propan-1-one (**3'b**)

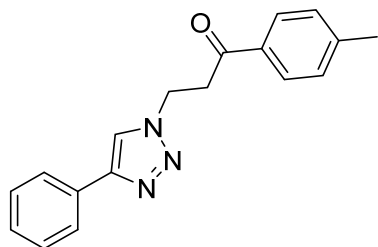

White solid (81.5 mg, 28%), m.p. 160-161 °C,  $R_f$  = 0.2 (petroleum/ethyl acetate = 5:1),  **$^1H$  NMR** (400 MHz,  $CDCl_3$ )  $\delta$  7.94 (s, 1H), 7.86 – 7.78 (m, 4H), 7.45 – 7.37 (m, 2H), 7.34 – 7.30 (m, 1H), 7.28 – 7.21 (m, 2H), 4.87 (t,  $J$  = 6.2 Hz, 2H), 3.67 (t,  $J$  = 6.2 Hz, 2H), 2.41 (s, 3H).  **$^{13}C$  NMR** (100 MHz,  $CDCl_3$ )  $\delta$  196.5, 145.1, 133.8, 130.9, 130.1, 129.8, 129.1, 128.5, 128.4, 126.0, 121.4, 45.2, 39.0, 22.0. **HRMS** (ESI-MS)  $m/z$   $[M+H]^+$  calcd for  $C_{18}H_{17}N_3O+H^+$ : 292.1444, found: 292.1443.

1-(4-methoxyphenyl)-3-(4-phenyl-2H-1,2,3-triazol-2-yl)propan-1-one (**3c**)

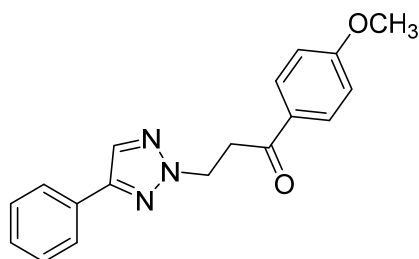

White solid (172.1 mg, 58%), m.p. 95-97 °C,  $R_f$  = 0.6 (petroleum/ethyl acetate = 5:1),  **$^1H$  NMR** (400 MHz,  $CDCl_3$ )  $\delta$  7.99 – 7.92 (m, 2H), 7.82 (s, 1H), 7.78 – 7.70 (m, 2H), 7.44 – 7.38 (m, 2H), 7.37 – 7.28 (m, 1H), 6.96 – 6.86 (m, 2H), 4.90 (t,  $J$  = 7.3 Hz, 2H), 3.85 (s, 3H), 3.68 (t,  $J$  = 7.3 Hz, 2H).  **$^{13}C$  NMR** (100 MHz,  $CDCl_3$ )  $\delta$  195.1, 163.7, 147.7, 130.8, 130.3, 129.4, 128.8, 128.3, 125.8, 113.8, 55.4, 50.0, 37.5. **HRMS** (ESI-MS)  $m/z$   $[M+H]^+$  calcd for  $C_{18}H_{17}N_3O_2+H^+$ : 308.1394, found: 308.1393.

1-(4-methoxyphenyl)-3-(4-phenyl-1H-1,2,3-triazol-1-yl)propan-1-one (**3'c**)

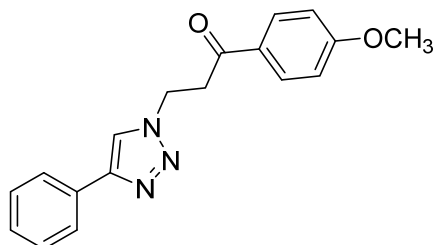

White solid (114.6 mg, 36%), m.p. 130-131 °C,  $R_f$  = 0.2 (petroleum/ethyl acetate = 5:1),  **$^1H$  NMR** (400 MHz,  $CDCl_3$ )  $\delta$  7.93 (s, 1H), 7.91 – 7.83 (m, 2H), 7.82 – 7.75 (m, 2H), 7.39 – 7.33 (m, 2H), 7.31 – 7.23 (m, 1H), 6.91 – 6.81 (m, 2H), 4.79 (t,  $J$  = 6.3 Hz, 2H),



3.80 (s, 3H), 3.57 (t,  $J = 6.3$  Hz, 2H).  $^{13}\text{C}$  NMR (100 MHz,  $\text{CDCl}_3$ )  $\delta$  194.8, 163.8, 147.3, 130.5, 130.2, 129.0, 128.9, 128.6, 128.6, 127.8, 125.5, 121.0, 113.7, 113.7, 55.3, 44.8, 38.1 HRMS (ESI-MS)  $m/z$   $[\text{M}+\text{H}]^+$  calcd for  $\text{C}_{18}\text{H}_{17}\text{N}_3\text{O}_2+\text{H}^+$ : 308.1394, found: 308.1393.

1-(4-chlorophenyl)-3-(4-phenyl-2H-1,2,3-triazol-2-yl)propan-1-one (**3d**)

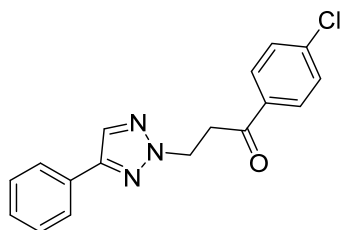

White solid (162.0 mg, 52%), m.p. 133-134 °C,  $R_f = 0.6$  (petroleum/ethyl acetate = 5:1),  $^1\text{H}$  NMR (400 MHz,  $\text{CDCl}_3$ )  $\delta$  7.96 – 7.88 (m, 2H), 7.82 (s, 1H), 7.79 – 7.71 (m, 2H), 7.47 – 7.39 (m, 4H), 7.37 – 7.29 (m, 1H), 4.92 (t,  $J = 7.1$  Hz, 2H), 3.71 (t,  $J = 7.1$  Hz, 2H).  $^{13}\text{C}$  NMR (100 MHz,  $\text{CDCl}_3$ )  $\delta$  195.8, 148.2, 140.3, 134.9, 131.3, 130.6, 129.8, 129.3, 129.1, 128.7, 126.1, 50.1, 38.1. HRMS (ESI-MS)  $m/z$   $[\text{M}+\text{H}]^+$  calcd for  $\text{C}_{17}\text{H}_{14}\text{ClN}_3\text{O}+\text{H}^+$ : 312.0898, found: 312.0898.

1-(4-chlorophenyl)-3-(4-phenyl-1H-1,2,3-triazol-1-yl)propan-1-one (**3'd**)

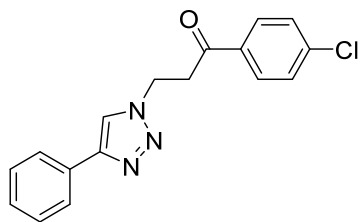

White solid (109.0 mg, 35%), m.p. 152-154 °C,  $R_f = 0.2$  (petroleum/ethyl acetate = 5:1),  $^1\text{H}$  NMR (400 MHz,  $\text{CDCl}_3$ )  $\delta$  7.93 (s, 1H), 7.91 – 7.85 (m, 2H), 7.83 – 7.79 (m, 2H), 7.49 – 7.36 (m, 4H), 7.36 – 7.27 (m, 1H), 4.86 (t,  $J = 6.2$  Hz, 2H), 3.67 (t,  $J = 6.2$  Hz, 2H).  $^{13}\text{C}$  NMR (100 MHz,  $\text{CDCl}_3$ )  $\delta$  195.4, 147.6, 140.4, 134.2, 130.5, 129.5, 129.2, 128.8, 128.1, 125.7, 121.1, 44.7, 38.6. HRMS (ESI-MS)  $m/z$   $[\text{M}+\text{H}]^+$  calcd for  $\text{C}_{17}\text{H}_{14}\text{ClN}_3\text{O}+\text{H}^+$ : 312.0898, found: 312.0898.

1-(4-bromophenyl)-3-(4-phenyl-2H-1,2,3-triazol-2-yl)propan-1-one (**3e**)

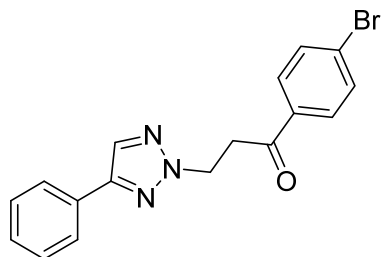

Yellow solid (188.8 mg, 53%), m.p. 143-144 °C,  $R_f = 0.6$  (petroleum/ethyl acetate = 5:1),  $^1\text{H}$  NMR (400 MHz,  $\text{CDCl}_3$ )  $\delta$  7.89 – 7.80 (m, 1H), 7.77 – 7.72 (m, 1H), 7.66 – 7.56 (m, 1H), 7.45 – 7.38 (m, 1H), 7.37 – 7.30 (m, 0H), 4.91 (t,  $J = 7.1$  Hz, 1H), 3.70

(t,  $J = 7.1$  Hz, 1H).  $^{13}\text{C}$  NMR (100 MHz,  $\text{CDCl}_3$ )  $\delta$  196.0, 148.2, 135.3, 132.3, 132.0, 131.3, 130.5, 129.9, 129.1, 128.7, 126.1, 50.1, 38.1. HRMS (ESI-MS)  $m/z$   $[\text{M}+\text{H}]^+$  calcd for  $\text{C}_{17}\text{H}_{14}\text{BrN}_3\text{O}+\text{H}^+$ : 356.0393, found: 356.0393.

1-(4-bromophenyl)-3-(4-phenyl-1H-1,2,3-triazol-1-yl)propan-1-one (**3'e**)

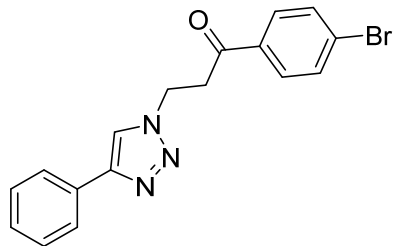

White solid (121.1 mg, 34%), m.p. 98-100 °C,  $R_f = 0.2$  (petroleum/ethyl acetate = 5:1),  $^1\text{H}$  NMR (400 MHz,  $\text{CDCl}_3$ )  $\delta$  7.92 (s, 0H), 7.86 – 7.76 (m, 2H), 7.61 (d,  $J = 8.6$  Hz, 1H), 7.41 (t,  $J = 7.5$  Hz, 1H), 7.32 (t,  $J = 7.4$  Hz, 0H), 4.85 (t,  $J = 6.2$  Hz, 1H), 3.66 (t,  $J = 6.2$  Hz, 1H).  $^{13}\text{C}$  NMR (100 MHz,  $\text{CDCl}_3$ )  $\delta$  195.9, 147.9, 134.9, 132.5, 130.8, 129.8, 129.5, 129.1, 128.4, 126.0, 121.4, 45.0, 38.9. HRMS (ESI-MS)  $m/z$   $[\text{M}+\text{H}]^+$  calcd for  $\text{C}_{17}\text{H}_{14}\text{BrN}_3\text{O}+\text{H}^+$ : 356.0393, found: 356.0393.

1-(3-bromophenyl)-3-(4-phenyl-2H-1,2,3-triazol-2-yl)propan-1-one (**3f**)

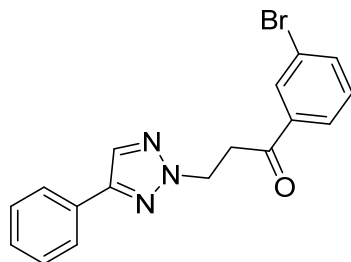

White solid (199.4 mg, 56%), m.p. 121-122 °C,  $R_f = 0.6$  (petroleum/ethyl acetate = 5:1),  $^1\text{H}$  NMR (400 MHz,  $\text{CDCl}_3$ )  $\delta$  8.09 (t,  $J = 1.8$  Hz, 1H), 7.90 – 7.85 (m, 1H), 7.82 (s, 1H), 7.77 – 7.72 (m, 2H), 7.71 – 7.64 (m, 1H), 7.44 – 7.37 (m, 2H), 7.38 – 7.27 (m, 2H), 4.90 (t,  $J = 7.0$  Hz, 2H), 3.69 (t,  $J = 7.0$  Hz, 2H).  $^{13}\text{C}$  NMR (100 MHz,  $\text{CDCl}_3$ )  $\delta$  195.6, 148.1, 138.2, 136.5, 131.4, 131.2, 130.5, 130.5, 129.1, 128.7, 126.8, 126.1, 123.3, 49.9, 38.1. HRMS (ESI-MS)  $m/z$   $[\text{M}+\text{H}]^+$  calcd for  $\text{C}_{17}\text{H}_{14}\text{BrN}_3\text{O}+\text{H}^+$ : 356.0393, found: 356.0390.

1-(3-bromophenyl)-3-(4-phenyl-1H-1,2,3-triazol-1-yl)propan-1-one (**3'f**)

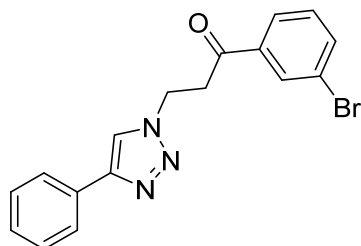

White solid (99.7 mg, 28%), m.p. 140-142 °C,  $R_f = 0.2$  (petroleum/ethyl acetate = 5:1),  $^1\text{H NMR}$  (400 MHz,  $\text{CDCl}_3$ )  $\delta$  8.07 (s, 1H), 7.93 (s, 1H), 7.86 (m, 1H), 7.83 – 7.78 (m, 2H), 7.71 (m, 1H), 7.41 (t,  $J = 7.5$  Hz, 2H), 7.39 – 7.29 (m, 2H), 4.86 (t,  $J = 6.1$  Hz, 2H), 3.67 (t,  $J = 6.1$  Hz, 2H).  $^{13}\text{C NMR}$  (100 MHz,  $\text{CDCl}_3$ )  $\delta$  195.6, 148.0, 137.9, 137.0, 131.4, 130.8, 130.7, 129.1, 128.4, 126.9, 126.0, 123.5, 121.4, 44.9, 39.1. **HRMS** (ESI-MS)  $m/z$   $[\text{M}+\text{H}]^+$  calcd for  $\text{C}_{17}\text{H}_{14}\text{BrIN}_3\text{O}+\text{H}^+$ : 356.0393, found: 356.0391.

1-(2-chlorophenyl)-3-(4-phenyl-2H-1,2,3-triazol-2-yl)propan-1-one (**3g**)

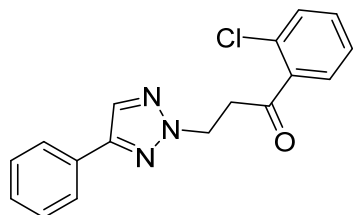

Yellow oil (158.9 mg, 51%),  $R_f = 0.6$  (petroleum/ethyl acetate = 5:1),  $^1\text{H NMR}$  (400 MHz,  $\text{CDCl}_3$ )  $\delta$  7.95 – 7.86 (m, 2H), 7.82 (s, 1H), 7.78 – 7.70 (m, 2H), 7.45 – 7.38 (m, 2H), 7.36 – 7.30 (m, 1H), 4.91 (t,  $J = 7.1$  Hz, 2H), 3.70 (t,  $J = 7.1$  Hz, 2H).  $^{13}\text{C NMR}$  (100 MHz,  $\text{CDCl}_3$ )  $\delta$  195.4, 147.8, 139.9, 134.6, 130.9, 130.2, 129.4, 129.0, 128.8, 128.4, 125.8, 49.7, 37.8. **HRMS** (ESI-MS)  $m/z$   $[\text{M}+\text{H}]^+$  calcd for  $\text{C}_{17}\text{H}_{14}\text{ClN}_3\text{O}+\text{H}^+$ : 312.0898, found: 312.0898.

1-(2-chlorophenyl)-3-(4-phenyl-1H-1,2,3-triazol-1-yl)propan-1-one (**3'g**)

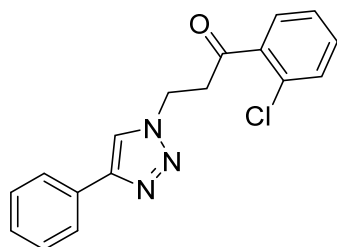

White solid (112.3mg, 36%), m.p. 99-100 °C,  $R_f = 0.2$  (petroleum/ethyl acetate = 5:1),  $^1\text{H NMR}$  (400 MHz,  $\text{CDCl}_3$ )  $\delta$  7.90 (s, 1H), 7.82 – 7.73 (m, 2H), 7.49 – 7.42 (m, 1H), 7.41 – 7.32 (m, 4H), 7.31 – 7.21 (m, 2H), 4.78 (t,  $J = 6.2$  Hz, 2H), 3.62 (t,  $J = 6.2$  Hz, 2H).  $^{13}\text{C NMR}$  (100 MHz,  $\text{CDCl}_3$ )  $\delta$  199.0, 137.4, 132.4, 131.0, 130.6, 130.4, 129.2, 128.6, 127.9, 126.9, 125.4, 120.8, 44.7, 42.4. **HRMS** (ESI-MS)  $m/z$   $[\text{M}+\text{H}]^+$  calcd for  $\text{C}_{17}\text{H}_{14}\text{ClN}_3\text{O}+\text{H}^+$ : 312.0898, found: 312.0898.

3-(4-(2-chlorophenyl)-2H-1,2,3-triazol-2-yl)-1-(4-methoxyphenyl)propan-1-one (**3h**)

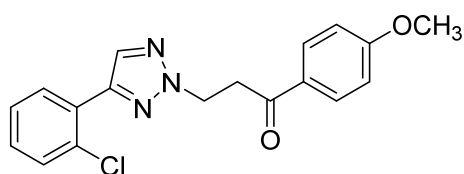

White solid (143.4 mg, 42%), m.p. 160-161 °C,  $R_f = 0.6$  (petroleum/ethyl acetate = 5:1),  $^1\text{H NMR}$  (400 MHz,  $\text{CDCl}_3$ )  $\delta$  8.11 (s, 1H), 7.97 (d,  $J = 8.9$  Hz, 2H), 7.85 – 7.80 (m,

1H), 7.48 – 7.42 (m, 1H), 7.32 – 7.27 (m, 2H), 6.94 (d,  $J = 9.0$  Hz, 2H), 4.94 (t,  $J = 7.3$  Hz, 2H), 3.87 (s, 3H), 3.70 (t,  $J = 7.3$  Hz, 2H).  $^{13}\text{C}$  NMR (100 MHz,  $\text{CDCl}_3$ )  $\delta$  195.1, 163.8, 134.2, 132.1, 132.1, 130.4, 130.4, 130.3, 129.4, 129.3, 129.2, 127.0, 113.9, 55.5, 50.2, 37.6. HRMS (ESI-MS)  $m/z$   $[\text{M}+\text{H}]^+$  calcd for  $\text{C}_{18}\text{H}_{16}\text{ClN}_3\text{O}_2+\text{H}^+$ : 342.1004, found: 342.1001.

3-(4-(2-chlorophenyl)-1H-1,2,3-triazol-1-yl)-1-(4-methoxyphenyl)propan-1-one (**3'h**)

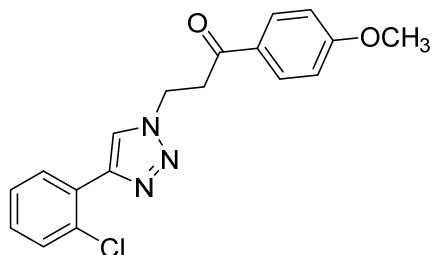

Yellow solid (140.0 mg, 41%), m.p. 138-139 °C,  $R_f = 0.3$  (petroleum/ethyl acetate = 5:1),  $^1\text{H}$  NMR (400 MHz,  $\text{CDCl}_3$ )  $\delta$  8.32 (s, 1H), 8.20 – 8.15 (m, 1H), 7.95 – 7.88 (m, 2H), 7.44 – 7.40 (m, 1H), 7.33 (d,  $J = 1.4$  Hz, 1H), 7.27 – 7.20 (m, 1H), 6.93 – 6.88 (m, 2H), 4.87 (t,  $J = 6.4$  Hz, 2H), 3.84 (s, 3H), 3.65 (t,  $J = 6.4$  Hz, 2H).  $^{13}\text{C}$  NMR (100 MHz,  $\text{CDCl}_3$ )  $\delta$  194.9, 163.9, 143.7, 131.2, 130.3, 130.1, 129.7, 129.3, 129.1, 128.9, 127.0, 124.5, 113.9, 55.5, 45.1, 38.3. HRMS (ESI-MS)  $m/z$   $[\text{M}+\text{H}]^+$  calcd for  $\text{C}_{18}\text{H}_{16}\text{ClN}_3\text{O}_2+\text{H}^+$ : 342.1004, found: 342.1003.

1-(4-bromophenyl)-3-(4-(2-chlorophenyl)-2H-1,2,3-triazol-2-yl)propan-1-one (**3'i**)

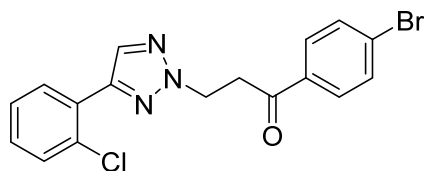

White solid (167.9 mg, 43%), m.p. 76-78 °C,  $R_f = 0.6$  (petroleum/ethyl acetate = 5:1),  $^1\text{H}$  NMR (400 MHz,  $\text{CDCl}_3$ )  $\delta$  8.10 (s, 1H), 7.87 – 7.76 (m, 3H), 7.61 (d,  $J = 8.6$  Hz, 2H), 7.49 – 7.40 (m, 1H), 7.35 – 7.25 (m, 2H), 4.94 (t,  $J = 7.1$  Hz, 2H), 3.71 (t,  $J = 7.1$  Hz, 2H).  $^{13}\text{C}$  NMR (100 MHz,  $\text{CDCl}_3$ )  $\delta$  195.6, 145.0, 135.0, 134.2, 132.0, 130.4, 130.2, 129.6, 129.4, 129.1, 128.8, 127.0, 49.8, 37.8. HRMS (ESI-MS)  $m/z$   $[\text{M}+\text{H}]^+$  calcd for  $\text{C}_{17}\text{H}_{13}\text{BrClN}_3\text{O}+\text{H}^+$ : 390.0003, found: 390.0001.

1-(4-bromophenyl)-3-(4-(2-chlorophenyl)-1H-1,2,3-triazol-1-yl)propan-1-one (**3'i**)

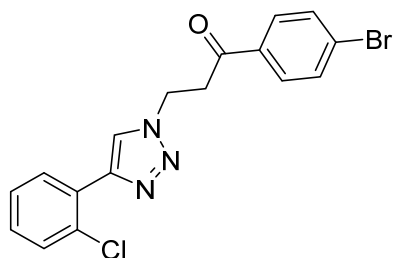

Yellow solid (156.2 mg, 40%), m.p. 146-147 °C,  $R_f = 0.3$  (petroleum/ethyl acetate = 5:1),  $^1\text{H NMR}$  (400 MHz,  $\text{CDCl}_3$ )  $\delta$  8.31 (s, 1H), 8.20 – 8.13 (m, 1H), 7.85 – 7.74 (m, 2H), 7.61 – 7.54 (m, 2H), 7.44 – 7.39 (m, 1H), 7.33 (d,  $J = 1.4$  Hz, 1H), 7.27 – 7.21 (m, 1H), 4.86 (t,  $J = 6.4$  Hz, 2H), 3.67 (t,  $J = 6.4$  Hz, 2H).  $^{13}\text{C NMR}$  (100 MHz,  $\text{CDCl}_3$ )  $\delta$  195.5, 143.8, 134.6, 132.0, 131.2, 130.1, 129.7, 129.5, 129.1, 129.0, 128.9, 127.1, 124.5, 44.8, 38.5. **HRMS** (ESI-MS)  $m/z$   $[\text{M}+\text{H}]^+$  calcd for  $\text{C}_{17}\text{H}_{13}\text{BrClN}_3\text{O}+\text{H}^+$ : 390.0003, found: 390.0001.

1-(naphthalen-2-yl)-3-(4-phenyl-2H-1,2,3-triazol-2-yl)propan-1-one (**3j**)

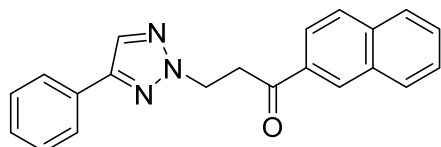

White solid (75.2 mg, 23%), m.p. 105-106 °C,  $R_f = 0.6$  (petroleum/ethyl acetate = 5:1),  $^1\text{H NMR}$  (400 MHz,  $\text{CDCl}_3$ )  $\delta$  8.69 (d,  $J = 8.5$  Hz, 1H), 8.01 (d,  $J = 8.2$  Hz, 1H), 7.95 (d,  $J = 7.2$  Hz, 1H), 7.88 (d,  $J = 8.7$  Hz, 1H), 7.84 (s, 1H), 7.74 (d,  $J = 6.9$  Hz, 2H), 7.64 – 7.44 (m, 3H), 7.40 (t,  $J = 7.4$  Hz, 2H), 7.34 (t,  $J = 7.3$  Hz, 1H), 5.01 (t,  $J = 6.9$  Hz, 2H), 3.82 (t,  $J = 6.9$  Hz, 2H).  $^{13}\text{C NMR}$  (100 MHz,  $\text{CDCl}_3$ )  $\delta$  200.3, 147.8, 134.8, 133.9, 133.2, 130.9, 130.3, 130.1, 128.8, 128.4, 128.3, 128.1, 128.1, 126.5, 125.8, 125.8, 124.3, 50.1, 40.8. **HRMS** (ESI-MS)  $m/z$   $[\text{M}+\text{H}]^+$  calcd for  $\text{C}_{21}\text{H}_{17}\text{N}_3\text{O}+\text{H}^+$ : 328.1444, found: 328.1441.

1-(naphthalen-2-yl)-3-(4-phenyl-1H-1,2,3-triazol-1-yl)propan-1-one (**3'j**)

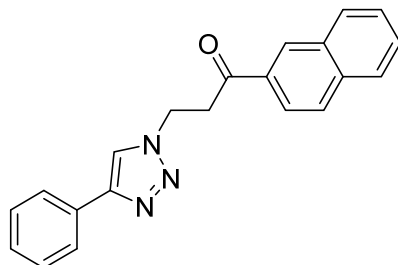

White solid (215.9 mg, 66%), m.p. 135-136 °C,  $R_f = 0.3$  (petroleum/ethyl acetate = 5:1),  $^1\text{H NMR}$  (400 MHz,  $\text{CDCl}_3$ )  $\delta$  8.67 (d,  $J = 8.6$  Hz, 1H), 7.97 (d,  $J = 10.6$  Hz, 2H), 7.88 – 7.79 (m, 4H), 7.59 (t,  $J = 7.7$  Hz, 1H), 7.52 (t,  $J = 7.4$  Hz, 1H), 7.42 (m, 3H), 7.31 (t,  $J = 7.4$  Hz, 1H), 4.88 (t,  $J = 6.2$  Hz, 2H), 3.73 (t,  $J = 6.2$  Hz, 2H).  $^{13}\text{C NMR}$  (100 MHz,  $\text{CDCl}_3$ )  $\delta$  200.0, 147.5, 133.9, 133.8, 133.6, 130.5, 130.0, 128.7, 128.5, 128.5, 128.3, 128.0, 126.5, 125.6, 125.4, 124.2, 121.0, 45.1, 41.3. **HRMS** (ESI-MS)  $m/z$   $[\text{M}+\text{H}]^+$  calcd for  $\text{C}_{21}\text{H}_{17}\text{N}_3\text{O}+\text{H}^+$ : 328.1444, found: 328.1442.

2-methyl-1-phenyl-3-(4-phenyl-2H-1,2,3-triazol-2-yl)propan-1-one (**3k**)

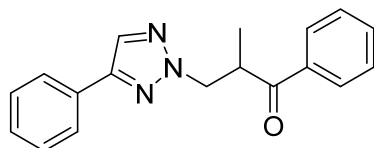

White solid (72.7 mg, 23%), m.p. 104-105 °C,  $R_f$  = 0.6 (petroleum/ethyl acetate = 5:1),  $^1\text{H NMR}$  (400 MHz,  $\text{CDCl}_3$ )  $\delta$  8.03 – 7.93 (m, 2H), 7.79 (s, 1H), 7.77 – 7.69 (m, 2H), 7.57 (t,  $J$  = 7.4 Hz, 1H), 7.47 (m, 2H), 7.41 (m, 2H), 7.34 (m, 1H), 4.92 (m, 1H), 4.59 (m, 1H), 4.30 (m, 1H), 1.28 (d,  $J$  = 7.1 Hz, 3H).  $^{13}\text{C NMR}$  (100 MHz,  $\text{CDCl}_3$ )  $\delta$  200.9, 147.4, 135.4, 133.0, 130.6, 130.0, 128.4, 128.4, 128.1, 128.0, 125.5, 56.5, 40.9, 15.6. **HRMS** (ESI-MS)  $m/z$   $[\text{M}+\text{H}]^+$  calcd for  $\text{C}_{18}\text{H}_{17}\text{N}_3\text{O}+\text{H}^+$ : 292.1444, found: 292.1443.

2-methyl-1-phenyl-3-(4-phenyl-1H-1,2,3-triazol-1-yl)propan-1-one (**3'k**)

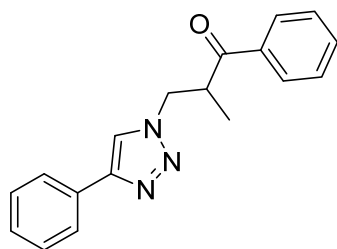

Yellow oil (151.3 mg, 50%),  $R_f$  = 0.1 (petroleum/ethyl acetate = 10:1),  $^1\text{H NMR}$  (400 MHz,  $\text{CDCl}_3$ )  $\delta$  7.94 – 7.87 (m, 2H), 7.82 (s, 1H), 7.78 (d,  $J$  = 6.9 Hz, 2H), 7.54 (t,  $J$  = 7.4 Hz, 1H), 7.40 (m, 4H), 7.30 (d,  $J$  = 7.4 Hz, 1H), 4.83 (m, 1H), 4.53 (m, 1H), 4.24 (m, 1H), 1.29 (d,  $J$  = 7.2 Hz, 3H).  $^{13}\text{C NMR}$  (100 MHz,  $\text{CDCl}_3$ )  $\delta$  201.2, 147.3, 135.2, 133.7, 130.4, 128.8, 128.7, 128.4, 128.0, 125.6, 121.1, 51.7, 42.0, 16.4. **HRMS** (ESI-MS)  $m/z$   $[\text{M}+\text{H}]^+$  calcd for  $\text{C}_{18}\text{H}_{17}\text{N}_3\text{O}+\text{H}^+$ : 292.1444, found: 292.1441

3-(4-methyl-5-phenyl-2H-1,2,3-triazol-2-yl)-1-phenylpropan-1-one (**3l**)

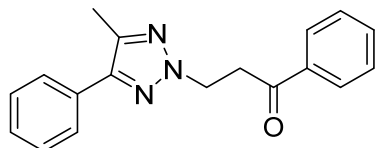

White solid (163.1 mg, 56%), m.p. 78-79 °C,  $R_f$  = 0.5 (petroleum/ethyl acetate = 5:1),  $^1\text{H NMR}$  (400 MHz,  $\text{CDCl}_3$ )  $\delta$  7.99 (d,  $J$  = 7.1 Hz, 2H), 7.66 (d,  $J$  = 8.2 Hz, 2H), 7.58 (t,  $J$  = 7.4 Hz, 1H), 7.51 – 7.39 (m, 4H), 7.34 (t,  $J$  = 7.3 Hz, 1H), 4.85 (t,  $J$  = 7.2 Hz, 2H), 3.72 (t,  $J$  = 7.2 Hz, 2H), 2.47 (s, 3H).  $^{13}\text{C NMR}$  (100 MHz,  $\text{CDCl}_3$ )  $\delta$  196.8, 144.9, 140.9, 136.3, 133.5, 131.2, 128.7, 128.6, 128.1, 127.8, 127.1, 49.6, 38.0, 11.7. **HRMS** (ESI-MS)  $m/z$   $[\text{M}+\text{H}]^+$  calcd for  $\text{C}_{18}\text{H}_{17}\text{N}_3\text{O}+\text{H}^+$ : 292.1444, found: 292.1443.

3-(5-methyl-4-phenyl-1H-1,2,3-triazol-1-yl)-1-phenylpropan-1-one (**3'l**)

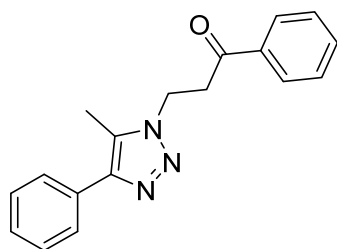

White solid (93.2 mg, 32%), m.p. 119-120 °C,  $R_f$  = 0.3 (petroleum/ethyl acetate = 5:1),  $^1\text{H NMR}$  (400 MHz,  $\text{CDCl}_3$ )  $\delta$  7.92 (d,  $J$  = 8.7 Hz, 2H), 7.66 (d,  $J$  = 7.0 Hz, 2H), 7.58

– 7.52 (m, 1H), 7.47 – 7.37 (m, 4H), 7.32 (t,  $J = 7.4$  Hz, 1H), 4.64 (t,  $J = 6.7$  Hz, 2H), 3.74 (t,  $J = 6.7$  Hz, 2H), 2.51 (s, 3H).  $^{13}\text{C}$  NMR (100 MHz,  $\text{CDCl}_3$ )  $\delta$  196.6, 144.2, 135.9, 133.6, 131.5, 129.5, 128.6, 128.5, 127.9, 127.4, 127.0, 42.3, 38.0, 9.0. HRMS (ESI-MS)  $m/z$   $[\text{M}+\text{H}]^+$  calcd for  $\text{C}_{18}\text{H}_{17}\text{N}_3\text{O}+\text{H}^+$ : 292.1444, found: 328.1443.

1-(4-methoxyphenyl)-3-(4-methyl-5-phenyl-2H-1,2,3-triazol-2-yl)propan-1-one (**3m**)

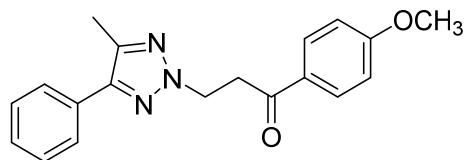

White solid (176.2 mg, 55%), m.p. 89-90 °C,  $R_f = 0.6$  (petroleum/ethyl acetate = 5:1),  $^1\text{H}$  NMR (400 MHz,  $\text{CDCl}_3$ )  $\delta$  7.95 (d,  $J = 8.9$  Hz, 2H), 7.66 (d,  $J = 6.9$  Hz, 2H), 7.42 (t,  $J = 7.5$  Hz, 2H), 7.34 (t,  $J = 7.4$  Hz, 1H), 6.92 (d,  $J = 8.9$  Hz, 2H), 4.83 (t,  $J = 7.3$  Hz, 2H), 3.85 (s, 3H), 3.66 (t,  $J = 7.3$  Hz, 2H), 2.46 (s, 3H).  $^{13}\text{C}$  NMR (100 MHz,  $\text{CDCl}_3$ )  $\delta$  195.2, 163.7, 144.8, 140.8, 131.2, 130.3, 129.4, 128.6, 127.8, 127.0, 113.8, 55.4, 49.7, 37.7, 11.7. HRMS (ESI-MS)  $m/z$   $[\text{M}+\text{H}]^+$  calcd for  $\text{C}_{19}\text{H}_{19}\text{N}_3\text{O}_2+\text{H}^+$ : 322.1550, found: 322.1548.

1-(4-methoxyphenyl)-3-(5-methyl-4-phenyl-1H-1,2,3-triazol-1-yl)propan-1-one (**3'm**)

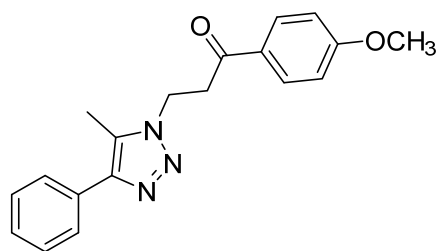

White solid (106 mg, 33%), m.p. 133-134 °C,  $R_f = 0.2$  (petroleum/ethyl acetate = 5:1),  $^1\text{H}$  NMR (400 MHz,  $\text{CDCl}_3$ )  $\delta$  7.90 (d,  $J = 8.9$  Hz, 2H), 7.65 (d,  $J = 6.9$  Hz, 2H), 7.41 (t,  $J = 7.6$  Hz, 2H), 7.32 (d,  $J = 7.3$  Hz, 1H), 4.63 (t,  $J = 6.8$  Hz, 2H), 3.82 (s, 3H), 3.67 (t,  $J = 6.8$  Hz, 2H), 2.50 (s, 3H).  $^{13}\text{C}$  NMR (100 MHz,  $\text{CDCl}_3$ )  $\delta$  195.1, 163.8, 144.2, 131.6, 130.3, 129.5, 129.1, 128.5, 127.4, 127.1, 113.8, 55.4, 42.5, 37.7, 9.0. HRMS (ESI-MS)  $m/z$   $[\text{M}+\text{H}]^+$  calcd for  $\text{C}_{19}\text{H}_{19}\text{N}_3\text{O}_2+\text{H}^+$ : 322.1550, found: 322.1549.

1-(4-bromophenyl)-3-(4-methyl-5-phenyl-2H-1,2,3-triazol-2-yl)propan-1-one (**3n**)

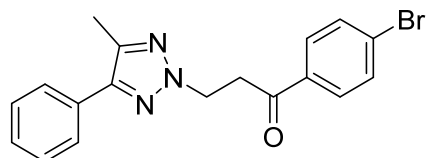

White solid (229 mg, 62%), m.p. 163-164 °C,  $R_f = 0.5$  (petroleum/ethyl acetate = 5:1),  $^1\text{H}$  NMR (400 MHz,  $\text{CDCl}_3$ )  $\delta$  7.83 (d,  $J = 8.6$  Hz, 2H), 7.67 – 7.58 (m, 4H), 7.42 (t,  $J = 7.4$  Hz, 2H), 7.34 (t,  $J = 7.4$  Hz, 1H), 4.83 (t,  $J = 7.2$  Hz, 2H), 3.67 (t,  $J = 7.2$  Hz, 2H), 2.46 (s, 3H).  $^{13}\text{C}$  NMR (100 MHz,  $\text{CDCl}_3$ )  $\delta$  195.8, 144.9, 140.9, 135.0, 132.0, 131.1, 129.6, 128.7, 128.6, 127.8, 127.0, 49.4, 37.9, 11.7. HRMS (ESI-MS)  $m/z$   $[\text{M}+\text{H}]^+$  calcd for  $\text{C}_{18}\text{H}_{16}\text{BrN}_3\text{O}+\text{H}^+$ : 370.0550, found: 370.0548.

1-(4-bromophenyl)-3-(5-methyl-4-phenyl-1H-1,2,3-triazol-1-yl)propan-1-one (**3'n**)

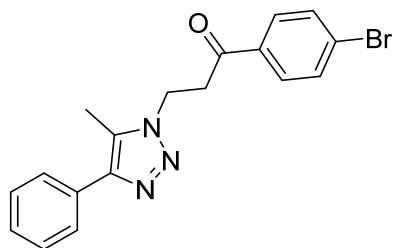

White solid (85 mg, 23%), m.p. 112-113 °C,  $R_f$  = 0.3 (petroleum/ethyl acetate = 5:1),  $^1\text{H NMR}$  (400 MHz,  $\text{CDCl}_3$ )  $\delta$  7.79 (d,  $J$  = 8.6 Hz, 2H), 7.65 (d,  $J$  = 6.9 Hz, 2H), 7.58 (d,  $J$  = 8.6 Hz, 2H), 7.42 (t,  $J$  = 7.5 Hz, 2H), 7.32 (t,  $J$  = 7.4 Hz, 1H), 4.63 (t,  $J$  = 6.6 Hz, 2H), 3.72 (t,  $J$  = 6.6 Hz, 2H), 2.52 (s, 3H).  $^{13}\text{C NMR}$  (100 MHz,  $\text{CDCl}_3$ )  $\delta$  195.7, 144.4, 134.7, 132.0, 131.5, 129.5, 129.5, 128.9, 128.6, 127.5, 127.1, 42.2, 37.9, 9.0. **HRMS** (ESI-MS)  $m/z$   $[\text{M}+\text{H}]^+$  calcd for  $\text{C}_{18}\text{H}_{16}\text{BrN}_3\text{O}+\text{H}^+$ : 370.0550, found: 370.0548.

3-(4,5-diphenyl-2H-1,2,3-triazol-2-yl)-1-phenylpropan-1-one (**3o**)

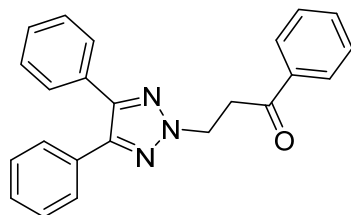

White solid (180.1 mg, 51%), m.p. 116-117 °C,  $R_f$  = 0.6 (petroleum/ethyl acetate = 5:1),  $^1\text{H NMR}$  (400 MHz,  $\text{CDCl}_3$ )  $\delta$  8.04 – 7.96 (m, 2H), 7.62 – 7.51 (m, 5H), 7.48 (t,  $J$  = 7.6 Hz, 2H), 7.41 – 7.31 (m, 6H), 4.96 (t,  $J$  = 7.3 Hz, 2H), 3.81 (t,  $J$  = 7.3 Hz, 2H).  $^{13}\text{C NMR}$  (100 MHz,  $\text{CDCl}_3$ )  $\delta$  196.7, 144.4, 136.3, 133.5, 130.9, 128.6, 128.5, 128.2, 128.2, 128.1, 50.0, 38.0. **HRMS** (ESI-MS)  $m/z$   $[\text{M}+\text{H}]^+$  calcd for  $\text{C}_{23}\text{H}_{19}\text{N}_3\text{O}+\text{H}^+$ : 354.1601, found: 354.1594.

3-(4,5-diphenyl-1H-1,2,3-triazol-1-yl)-1-phenylpropan-1-one (**3'o**)

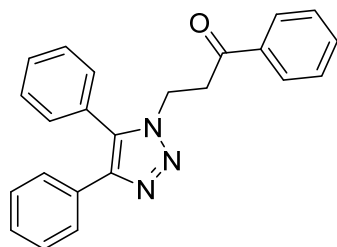

White solid (137.7 mg, 39%), m.p. 170-172 °C,  $R_f$  = 0.2 (petroleum/ethyl acetate = 5:1),  $^1\text{H NMR}$  (400 MHz,  $\text{CDCl}_3$ )  $\delta$  7.95 – 7.88 (m, 2H), 7.62 – 7.49 (m, 6H), 7.48 – 7.36 (m, 4H), 7.31 – 7.19 (m, 3H), 4.60 (t,  $J$  = 7.2 Hz, 2H), 3.71 (t,  $J$  = 7.2 Hz, 2H).  $^{13}\text{C NMR}$  (100 MHz,  $\text{CDCl}_3$ )  $\delta$  196.8, 144.6, 136.4, 134.4, 133.9, 131.2, 130.3, 130.1, 129.7, 129.0, 128.7, 128.3, 128.1, 127.9, 127.1, 43.6, 38.3. **HRMS** (ESI-MS)  $m/z$   $[\text{M}+\text{H}]^+$  calcd for  $\text{C}_{23}\text{H}_{19}\text{N}_3\text{O}+\text{H}^+$ : 354.1601, found: 354.1594.



1-(2-chlorophenyl)-3-(4,5-diphenyl-2H-1,2,3-triazol-2-yl)propan-1-one (**3p**)

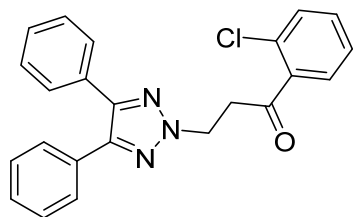

Yellow oil (193.8 mg, 50%),  $R_f = 0.6$  (petroleum/ethyl acetate = 5:1),  $^1\text{H NMR}$  (400 MHz,  $\text{CDCl}_3$ )  $\delta$  7.61 – 7.55 (m, 1H), 7.55 – 7.51 (m, 3H), 7.43 – 7.39 (m, 2H), 7.38 – 7.31 (m, 8H), 4.94 (t,  $J = 7.0$  Hz, 2H), 3.77 (t,  $J = 7.0$  Hz, 2H).  $^{13}\text{C NMR}$  (100 MHz,  $\text{CDCl}_3$ )  $\delta$  199.5, 144.4, 138.4, 132.1, 131.2, 131.1, 130.9, 130.6, 129.5, 128.5, 128.2, 128.2, 126.9, 49.8, 41.9. **HRMS** (ESI-MS)  $m/z$   $[\text{M}+\text{H}]^+$  calcd for  $\text{C}_{23}\text{H}_{18}\text{ClN}_3\text{O}+\text{H}^+$ : 388.1211, found: 388.1209.

1-(2-chlorophenyl)-3-(4,5-diphenyl-1H-1,2,3-triazol-1-yl)propan-1-one (**3'p**)

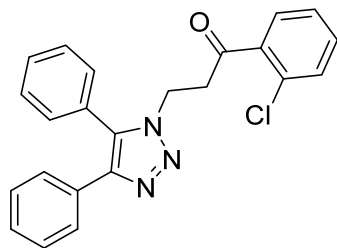

Yellow solid (158.9mg, 41%), m.p. 123-124 °C,  $R_f = 0.2$  (petroleum/ethyl acetate = 5:1),  $^1\text{H NMR}$  (400 MHz,  $\text{CDCl}_3$ )  $\delta$  7.59 – 7.44 (m, 6H), 7.42 – 7.35 (m, 4H), 7.32 – 7.28 (m, 1H), 7.27 – 7.21 (m, 3H), 4.57 (t,  $J = 6.9$  Hz, 2H), 3.66 (t,  $J = 6.9$  Hz, 2H).  $^{13}\text{C NMR}$  (100 MHz,  $\text{CDCl}_3$ )  $\delta$  199.0, 144.2, 137.9, 133.9, 132.2, 130.9, 130.7, 130.5, 129.8, 129.7, 129.4, 129.3, 128.3, 127.6, 126.9, 126.7, 43.1, 41.7. **HRMS** (ESI-MS)  $m/z$   $[\text{M}+\text{H}]^+$  calcd for  $\text{C}_{23}\text{H}_{18}\text{ClN}_3\text{O}+\text{H}^+$ : 388.1211, found: 388.1209.

3-(4,5-diphenyl-2H-1,2,3-triazol-2-yl)-1-(4-methoxyphenyl)propan-1-one (**3q**)

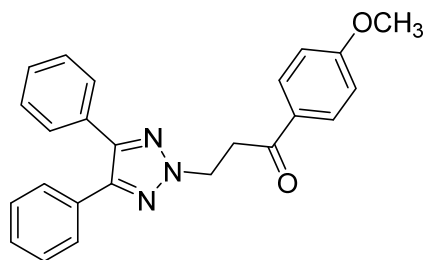

White solid (172.4 mg, 45%), m.p. 92-93 °C,  $R_f = 0.6$  (petroleum/ethyl acetate = 5:1),  $^1\text{H NMR}$  (400 MHz,  $\text{CDCl}_3$ )  $\delta$  7.98 (d,  $J = 8.9$  Hz, 2H), 7.60 – 7.50 (m, 4H), 7.40 – 7.29 (m, 6H), 6.93 (d,  $J = 8.9$  Hz, 2H), 4.94 (t,  $J = 7.4$  Hz, 2H), 3.85 (s, 3H), 3.75 (t,  $J = 7.3$  Hz, 2H).  $^{13}\text{C NMR}$  (100 MHz,  $\text{CDCl}_3$ )  $\delta$  195.1, 163.7, 144.3, 130.9, 130.3, 129.4, 128.4, 128.4, 128.3, 128.2, 128.2, 128.1, 113.7, 55.4, 50.1, 37.6. **HRMS** (ESI-MS)  $m/z$   $[\text{M}+\text{H}]^+$  calcd for  $\text{C}_{24}\text{H}_{21}\text{N}_3\text{O}_2+\text{H}^+$ : 384.1707, found: 384.1703.

3-(4,5-diphenyl-1H-1,2,3-triazol-1-yl)-1-(4-methoxyphenyl)propan-1-one (**3'q**)

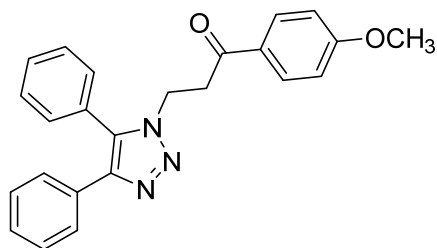

Yellow solid (145.6 mg, 38%), m.p. 79-80 °C,  $R_f = 0.2$  (petroleum/ethyl acetate = 5:1),  $^1\text{H NMR}$  (400 MHz,  $\text{CDCl}_3$ )  $\delta$  7.86 (d,  $J = 8.9$  Hz, 2H), 7.57 – 7.44 (m, 5H), 7.44 – 7.33 (m, 2H), 7.33 – 7.15 (m, 3H), 6.93 – 6.84 (m, 2H), 4.56 (t,  $J = 7.3$  Hz, 2H), 3.82 (s, 3H), 3.62 (t,  $J = 7.3$  Hz, 2H).  $^{13}\text{C NMR}$  (100 MHz,  $\text{CDCl}_3$ )  $\delta$  194.9, 163.8, 134.0, 130.8, 130.3, 129.9, 129.7, 129.3, 129.1, 128.3, 127.7, 127.6, 126.7, 113.8, 55.4, 43.4, 37.6. **HRMS** (ESI-MS)  $m/z$   $[\text{M}+\text{H}]^+$  calcd for  $\text{C}_{24}\text{H}_{21}\text{N}_3\text{O}_2+\text{H}^+$ : 384.1707, found: 384.1703.

1-(4-chlorophenyl)-3-(4,5-diphenyl-2H-1,2,3-triazol-2-yl)propan-1-one (**3r**)

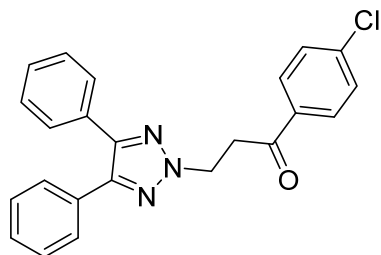

White solid (174.4mg, 45%), m.p. 105-106 °C,  $R_f = 0.6$  (petroleum/ethyl acetate = 5:1),  $^1\text{H NMR}$  (400 MHz,  $\text{CDCl}_3$ )  $\delta$  7.97 – 7.90 (m, 2H), 7.54 – 7.48 (m, 4H), 7.47 – 7.42 (m, 2H), 7.41 – 7.30 (m, 6H), 4.94 (t,  $J = 7.2$  Hz, 2H), 3.76 (t,  $J = 7.2$  Hz, 2H).  $^{13}\text{C NMR}$  (100 MHz,  $\text{CDCl}_3$ )  $\delta$  195.5, 144.5, 140.0, 134.6, 130.9, 129.5, 129.0, 128.5, 128.3, 128.2, 49.9, 37.9. **HRMS** (ESI-MS)  $m/z$   $[\text{M}+\text{H}]^+$  calcd for  $\text{C}_{23}\text{H}_{18}\text{ClN}_3\text{O}+\text{H}^+$ : 388.1211, found: 388.1214.

1-(4-chlorophenyl)-3-(4,5-diphenyl-1H-1,2,3-triazol-1-yl)propan-1-one (**3'r**)

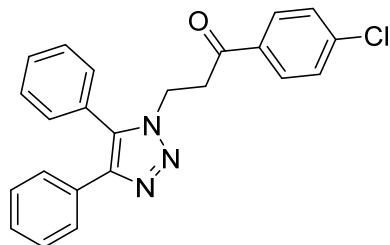

White solid (166.7 mg, 43%), m.p. 162-163 °C,  $R_f = 0.2$  (petroleum/ethyl acetate = 5:1),  $^1\text{H NMR}$  (400 MHz,  $\text{CDCl}_3$ )  $\delta$  7.85 (d,  $J = 8.6$  Hz, 2H), 7.59 – 7.48 (m, 4H), 7.46 – 7.35 (m, 4H), 7.31 – 7.19 (m, 3H), 4.58 (t,  $J = 7.1$  Hz, 2H), 3.68 (t,  $J = 7.1$  Hz, 2H).  $^{13}\text{C NMR}$  (100 MHz,  $\text{CDCl}_3$ )  $\delta$  195.3, 144.4, 140.1, 134.4, 134.1, 130.8, 130.0, 129.8,

129.4, 129.0, 128.4, 127.7, 126.8, 43.1, 37.9. **HRMS** (ESI-MS)  $m/z$   $[M+H]^+$  calcd for  $C_{23}H_{18}ClN_3O+H^+$ : 388.1211, found: 388.1208.

1-(4-bromophenyl)-3-(4,5-diphenyl-2H-1,2,3-triazol-2-yl)propan-1-one (**3s**)

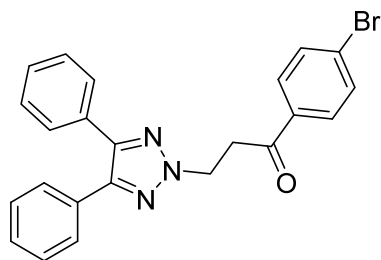

Yellow solid (190.1 mg, 44%), m.p. 136-137 °C,  $R_f$  = 0.6 (petroleum/ethyl acetate = 5:1),  $^1H$  NMR (400 MHz,  $CDCl_3$ )  $\delta$  7.85 (d,  $J$  = 8.6 Hz, 2H), 7.61 (d,  $J$  = 8.6 Hz, 2H), 7.56 – 7.49 (m, 4H), 7.41 – 7.30 (m, 6H), 4.94 (t,  $J$  = 7.2 Hz, 2H), 3.75 (t,  $J$  = 7.2 Hz, 2H).  $^{13}C$  NMR (100 MHz,  $CDCl_3$ )  $\delta$  195.7, 144.5, 135.0, 131.9, 130.9, 129.5, 128.7, 128.5, 128.3, 128.1, 49.8, 37.8. **HRMS** (ESI-MS)  $m/z$   $[M+H]^+$  calcd for  $C_{23}H_{18}BrN_3O+H^+$ : 423.0706, found: 427.0703.

1-(4-bromophenyl)-3-(4,5-diphenyl-1H-1,2,3-triazol-1-yl)propan-1-one (**3's**)

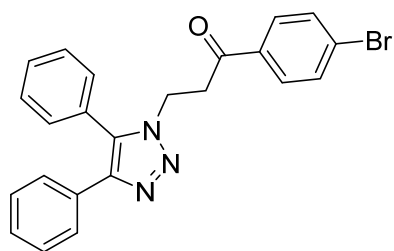

White solid (172.8 mg, 40%), m.p. 175-176 °C,  $R_f$  = 0.3 (petroleum/ethyl acetate = 5:1),  $^1H$  NMR (400 MHz,  $CDCl_3$ )  $\delta$  7.79 (d,  $J$  = 8.6 Hz, 2H), 7.60 (d,  $J$  = 8.5 Hz, 2H), 7.57 – 7.52 (m, 5H), 7.42 (m, 2H), 7.27 (d,  $J$  = 7.0 Hz, 3H), 4.59 (t,  $J$  = 7.0 Hz, 2H), 3.69 (t,  $J$  = 7.1 Hz, 2H).  $^{13}C$  NMR (100 MHz,  $CDCl_3$ )  $\delta$  195.5, 144.3, 134.7, 134.0, 132.0, 130.8, 129.9, 129.8, 129.5, 129.4, 128.8, 128.4, 127.6, 126.7, 43.1, 37.8. **HRMS** (ESI-MS)  $m/z$   $[M+H]^+$  calcd for  $C_{23}H_{18}BrN_3O+H^+$ : 423.0706, found: 427.0703.

3-(4,5-diphenyl-2H-1,2,3-triazol-2-yl)-1-(naphthalen-2-yl)propan-1-one (**3t**)

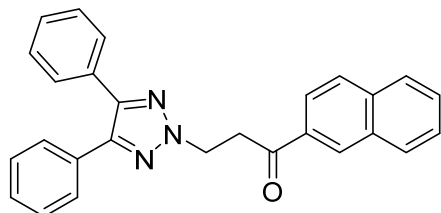

White solid (242.0 mg, 60%), m.p. 140-142 °C,  $R_f$  = 0.5 (petroleum/ethyl acetate = 5:1),  $^1H$  NMR (400 MHz,  $CDCl_3$ )  $\delta$  8.73 (d,  $J$  = 8.5 Hz, 1H), 8.04 – 7.92 (m, 2H), 7.91 – 7.85 (m, 1H), 7.62 – 7.51 (m, 6H), 7.51 – 7.45 (m, 1H), 7.37 – 7.33 (m, 6H), 5.05 (t,  $J$  = 6.9 Hz, 2H), 3.87 (t,  $J$  = 6.9 Hz, 2H).  $^{13}C$  NMR (100 MHz,  $CDCl_3$ )  $\delta$  200.4, 144.4,

134.9, 133.9, 133.1, 130.9, 130.0, 128.4, 128.3, 128.2, 128.1, 128.1, 128.0, 126.5, 125.8, 124.2, 50.2, 40.8. **HRMS** (ESI-MS)  $m/z$   $[M+H]^+$  calcd for  $C_{27}H_{21}N_3O+H^+$ : 404.1757, found: 404.1754.

3-(4,5-diphenyl-1H-1,2,3-triazol-1-yl)-1-(naphthalen-2-yl)propan-1-one (**3't**)

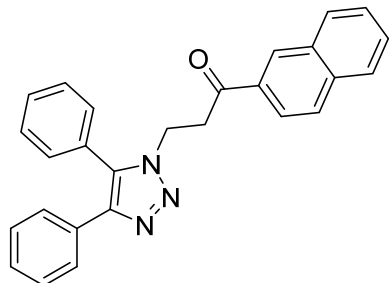

Yellow oil (92.7 mg, 23%), m.p. 112-113 °C,  $R_f$  = 0.2 (petroleum/ethyl acetate = 5:1),  **$^1H$  NMR** (400 MHz,  $CDCl_3$ )  $\delta$  8.60 (d,  $J$  = 8.5 Hz, 1H), 7.99 (d,  $J$  = 8.2 Hz, 1H), 7.91 (d,  $J$  = 6.1 Hz, 1H), 7.86 (d,  $J$  = 6.3 Hz, 1H), 7.62 – 7.47 (m, 7H), 7.50 – 7.39 (m, 3H), 7.31 – 7.21 (m, 4H), 4.66 (t,  $J$  = 7.0 Hz, 2H), 3.80 (t,  $J$  = 7.0 Hz, 2H).  **$^{13}C$  NMR** (100 MHz,  $CDCl_3$ )  $\delta$  200.0, 134.3, 133.8, 133.4, 130.8, 130.0, 129.7, 129.4, 128.4, 128.2, 127.7, 127.6, 126.8, 126.5, 125.6, 124.3, 43.5, 40.7. **HRMS** (ESI-MS)  $m/z$   $[M+H]^+$  calcd for  $C_{27}H_{21}N_3O+H^+$ : 404.1757, found: 404.1752.

3-(4,5-diphenyl-2H-1,2,3-triazol-2-yl)-1-(thiophen-2-yl)propan-1-one (**3u**)

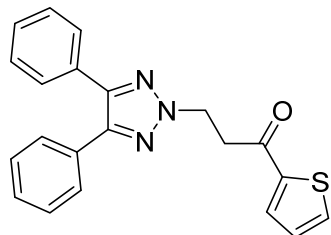

White solid (175.9 mg, 49%),  **$^1H$  NMR** (400 MHz,  $CDCl_3$ )  $\delta$  7.72 (d,  $J$  = 3.9 Hz, 1H), 7.67 (d,  $J$  = 5.0 Hz, 1H), 7.60 – 7.51 (m, 5H), 7.45 – 7.38 (m, 2H), 7.33 – 7.23 (m, 3H), 7.14 (d,  $J$  = 4.4 Hz, 1H), 4.60 (t,  $J$  = 7.1 Hz, 2H), 3.68 (t,  $J$  = 7.1 Hz, 2H).  **$^{13}C$  NMR** (100 MHz,  $CDCl_3$ )  $\delta$  189.2, 144.3, 143.2, 134.3, 134.1, 132.5, 130.8, 130.0, 129.8, 129.4, 128.4, 128.3, 127.7, 126.8, 43.1, 38.5. **HRMS** (ESI-MS)  $m/z$   $[M+Na]^+$  calcd for  $C_{21}H_{17}N_3OS+Na^+$ : 382.0985, found: 382.0988

3-(4,5-diphenyl-1H-1,2,3-triazol-1-yl)-1-(thiophen-2-yl)propan-1-one (**3'u**)

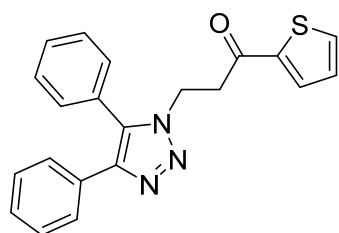

White solid (136.4 mg, 38%),  **$^1H$  NMR** (400 MHz,  $CDCl_3$ )  $\delta$  7.68 (m, 1.2 Hz, 1H), 7.63 (m 1.1 Hz, 1H), 7.57 – 7.46 (m, 5H), 7.38 (m, 3.6 Hz, 2H), 7.10 (m, 3.8 Hz, 1H), 4.56 (t,  $J$  = 7.1 Hz, 2H), 3.64 (t,  $J$  = 7.1 Hz, 2H).  **$^{13}C$  NMR** (100MHz,  $CDCl_3$ )  $\delta$  189.2,

144.3, 143.2, 134.3, 132.5, 130.8, 130.0, 129.8, 129.4, 128.4, 128.2, 127.7, 126.8, 43.1, 38.5. **HRMS** (ESI-MS)  $m/z$   $[M+Na]^+$  calcd for  $C_{21}H_{17}N_3OS+Na^+$ : 359.1092, found: 382.0985, found: 382.0987

3-(4-(4-methoxyphenyl)-5-phenyl-2H-1,2,3-triazol-2-yl)-1-phenylpropan-1-one (**3v**)

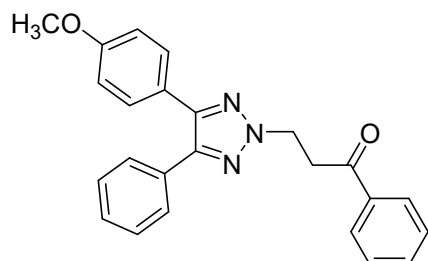

White solid (199.1 mg, 52%), ratio of  $N^1$ -product/ $N^3$ product is about 0.63:0.37.  **$^1H$  NMR** (400 MHz,  $CDCl_3$ )  $\delta$  8.06 – 7.99 (m, 2H), 7.64 – 7.55 (m, 3H), 7.53 – 7.47 (m, 2H), 7.38 (dd,  $J = 5.3, 1.9$  Hz, 3H), 7.31 – 7.27 (m, 1H), 7.17 – 7.10 (m, 2H), 6.95 – 6.88 (m, 1H), 4.98 (t,  $J = 7.2$  Hz, 2H), 3.83 (t,  $J = 7.3$  Hz, 2H), 3.75 (s, 3H).  **$^{13}C$  NMR** (100 MHz,  $CDCl_3$ )  $\delta$  196.7, 159.6, 144.5, 144.3, 136.3, 133.5, 132.2, 130.9, 129.5, 128.6, 128.4, 128.3, 128.3, 128.0, 120.6, 114.5, 113.1, 55.1, 50.0, 38.0. **HRMS** (ESI-MS)  $m/z$   $[M+H]^+$  calcd for  $C_{24}H_{21}N_3O_2S+H^+$ : 384.1707, found:384.1708

3-(4-(4-methoxyphenyl)-5-phenyl-1H-1,2,3-triazol-1-yl)-1-phenylpropan-1-one and 3-(5-(4-methoxyphenyl)-4-phenyl-1H-1,2,3-triazol-1-yl)-1-phenylpropan-1-one (**3'v**)

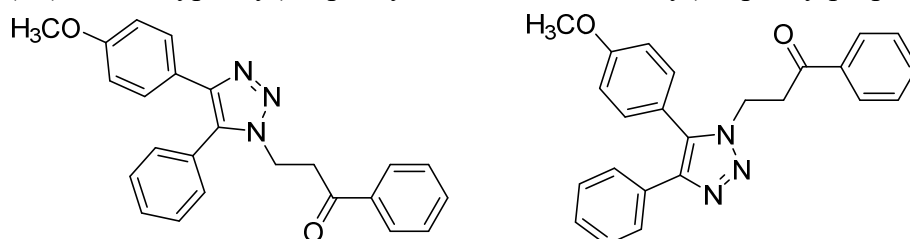

Yellow oil (137.8 mg, 38%), ratio of  $N^1$ -product/ $N^3$ product is about 0.62:0.38.  **$^1H$  NMR** (400 MHz,  $CDCl_3$ )  $\delta$  7.93 (d,  $J = 7.9$  Hz, 3H), 7.80 (d,  $J = 7.9$  Hz, 1H), 7.64 – 7.50 (m, 7H), 7.50 – 7.44 (m, 5H), 7.44 (s, 4H), 7.03 – 6.86 (m, 2H), 6.85 – 6.75 (m, 1H), 4.67 – 4.56 (m, 3H), 3.83 (s, 2H), 3.76 – 3.71 (m, 4H), 3.69 (s, 3H).  **$^{13}C$  NMR** (100 MHz,  $CDCl_3$ )  $\delta$  196.5, 159.5, 133.6, 130.5, 130.0, 129.8, 129.4, 128.7, 128.4, 128.0, 127.7, 126.7, 122.1, 119.1, 115.4, 114.1, 111.5, 55.3, 55.0, 43.3, 43.3, 38.0, 37.9.

3-(4-pentyl-5-phenyl-2H-1,2,3-triazol-2-yl)-1-phenylpropan-1-one(**3w**)

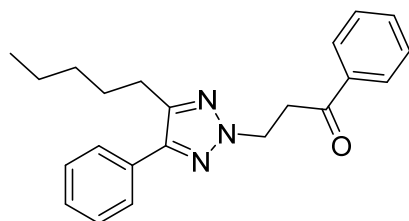

Colorless oil (201.8 mg, 58%),  **$^1H$  NMR** (400 MHz,  $CDCl_3$ )  $\delta$  8.00 – 7.94 (m, 2H), 7.66 – 7.61 (m, 2H), 7.58 – 7.52 (m, 1H), 7.49 – 7.38 (m, 4H), 7.37 – 7.30 (m, 1H),

4.86 (t,  $J = 7.2$  Hz, 2H), 3.71 (t,  $J = 7.2$  Hz, 2H), 2.81 (t,  $J = 7.9$  Hz, 2H), 1.70 (t,  $J = 7.7$  Hz, 2H), 1.34 (h,  $J = 4.5, 3.5$  Hz, 4H), 0.88 (t,  $J = 6.8$  Hz, 3H).  $^{13}\text{C}$  NMR (100 MHz,  $\text{CDCl}_3$ )  $\delta$  196.8, 145.4, 144.7, 136.4, 133.4, 131.4, 128.6, 128.6, 128.1, 127.8, 127.3, 49.7, 38.0, 31.7, 28.6, 25.8, 22.4, 14.0. **HRMS** (ESI-MS)  $m/z$   $[\text{M}+\text{H}]^+$  calcd for  $\text{C}_{22}\text{H}_{25}\text{N}_3\text{O}+\text{H}^+$ : 384.2070, found:348.2071

3-(5-pentyl-4-phenyl-1*H*-1,2,3-triazol-1-yl)-1-phenylpropan-1-one and 3-(4-pentyl-5-phenyl-1*H*-1,2,3-triazol-1-yl)-1-phenylpropan-1-one (**3'w**)

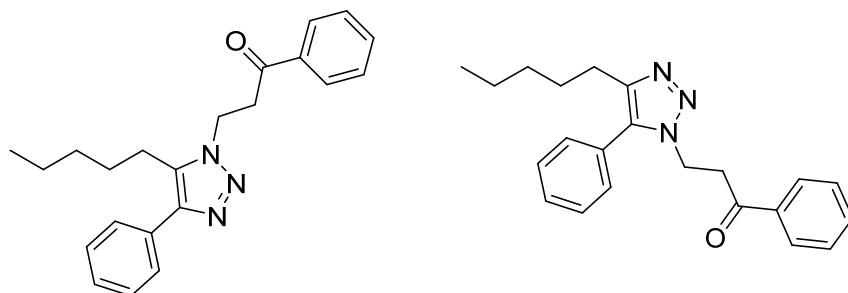

Colorless oil (80.6 mg, 20%), ratio of  $N^1$ -product/ $N^3$ product is about 0.79:0.21.  $^1\text{H}$  NMR (400 MHz,  $\text{CDCl}_3$ )  $\delta$  8.01 – 7.95 (m, 2H), 7.91 – 7.88 (m, 1H), 7.71 – 7.65 (m, 2H), 7.59 (q,  $J = 7.3$  Hz, 1H), 7.52 – 7.41 (m, 6H), 7.35 – 7.32 (m, 1H), 4.69 (t,  $J = 6.9$  Hz, 2H), 4.60 (t,  $J = 7.2$  Hz, 1H), 3.82 (t,  $J = 6.9$  Hz, 2H), 3.66 (t,  $J = 7.3$  Hz, 1H), 2.95 – 2.90 (m, 2H), 2.64 – 2.59 (m, 1H), 1.79 (s, 1H), 1.64 (p,  $J = 7.6$  Hz, 3H), 1.36 (tdd,  $J = 15.6, 7.7, 2.5$  Hz, 5H), 1.26 (td,  $J = 7.2, 6.2, 3.3$  Hz, 2H), 0.88 (t,  $J = 6.9$  Hz, 4H), 0.84 (d,  $J = 6.7$  Hz, 1H).  $^{13}\text{C}$  NMR (100 MHz,  $\text{CDCl}_3$ )  $\delta$  196.8, 144.2, 136.1, 134.0, 133.7, 131.8, 129.6, 129.3, 129.1, 128.8, 128.7, 128.7, 128.6, 128.6, 128.1, 128.0, 127.6, 127.5, 127.2, 109.1, 42.5, 38.2, 38.2, 31.6, 31.4, 29.3, 28.7, 23.0, 23.0, 22.3, 22.2, 16.0, 13.9, 13.9.

1-phenyl-3-(4-phenyl-5-(*p*-tolyl)-2*H*-1,2,3-triazol-2-yl)propan-1-one (**3x**)

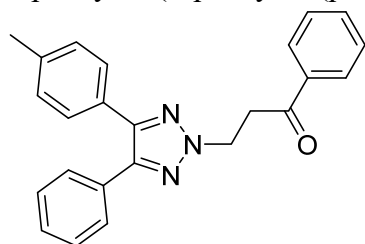

White solid (198mg, 54%),  $^1\text{H}$  NMR (400 MHz,  $\text{CDCl}_3$ )  $\delta$  8.01 (d,  $J = 7.6$  Hz, 2H), 7.63 – 7.52 (m, 3H), 7.51 – 7.40 (m, 4H), 7.39 – 7.31 (m, 3H), 7.17 (d,  $J = 7.8$  Hz, 2H), 4.95 (t,  $J = 7.3$  Hz, 2H), 3.80 (t,  $J = 7.3$  Hz, 2H), 2.38 (s, 3H).  $^{13}\text{C}$  NMR (100 MHz,  $\text{CDCl}_3$ )  $\delta$  196.7, 144.5, 144.3, 138.1, 136.3, 133.4, 131.1, 129.2, 128.6, 128.4, 128.1, 128.1, 77.3, 77.0, 76.7, 50.0, 38.1, 21.3. **HRMS** (ESI-MS)  $m/z$   $[\text{M}+\text{H}]^+$  calcd for  $\text{C}_{24}\text{H}_{21}\text{N}_3\text{O}+\text{H}^+$ : 368.1757, found: 368.1761

1-phenyl-3-(4-phenyl-5-(*p*-tolyl)-1*H*-1,2,3-triazol-1-yl)propan-1-one and 1-phenyl-3-(5-phenyl-4-(*p*-tolyl)-1*H*-1,2,3-triazol-1-yl)propan-1-one (**3'x**)

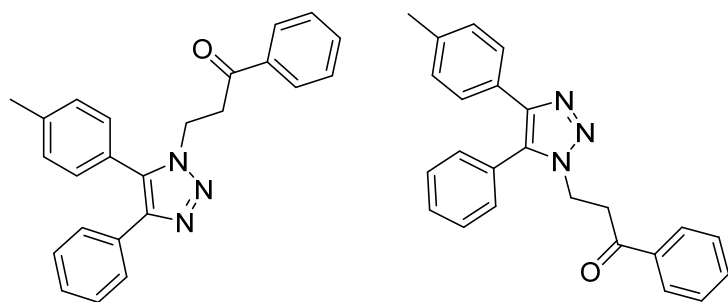

Yellow oil, (114mg, 31%), ratio of  $N^1$ -product/ $N^3$ -product is about 0.53:0.47.  $^1\text{H NMR}$  (400 MHz,  $\text{CDCl}_3$ )  $\delta$  7.84 (d,  $J = 7.7$  Hz, 2H), 7.54 – 7.29 (m, 8H), 7.23 – 7.12 (m, 3H), 7.01 (d,  $J = 7.9$  Hz, 1H), 4.52 (t,  $J = 7.2$  Hz, 2H), 3.63 (q,  $J = 3.2$  Hz, 2H), 2.37 (s, 1H), 2.24 (s, 2H).  $^{13}\text{C NMR}$  (100 MHz,  $\text{CDCl}_3$ )  $\delta$  196.5, 193.5, 136.0, 136.0, 133.6, 130.1, 130.0, 129.8, 129.4, 129.1, 128.7, 128.4, 128.0, 127.6, 126.7, 126.7, 43.3, 43.2, 38.1, 38.1, 21.4, 21.2.

### 3-(4-bromo-5-phenyl-2H-1,2,3-triazol-2-yl)-1-phenylpropan-1-one (4a)

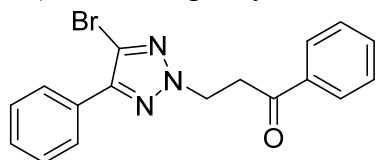

White solid (292 mg, 82%), m.p. 175-176 °C,  $R_f = 0.6$  (petroleum/ethyl acetate = 5:1),  $^1\text{H NMR}$  (400 MHz,  $\text{CDCl}_3$ )  $\delta$  7.98 (d,  $J = 7.0$  Hz, 2H), 7.90 (d,  $J = 6.8$  Hz, 2H), 7.59 (t,  $J = 7.4$  Hz, 1H), 7.51 – 7.34 (m, 5H), 4.89 (t,  $J = 7.2$  Hz, 2H), 3.74 (t,  $J = 7.2$  Hz, 2H).  $^{13}\text{C NMR}$  (100 MHz,  $\text{CDCl}_3$ )  $\delta$  196.2, 145.3, 136.1, 133.5, 129.0, 128.7, 128.7, 128.5, 128.0, 127.1, 119.5, 50.6, 37.6. **HRMS** (ESI-MS)  $m/z$   $[\text{M}+\text{H}]^+$  calcd for  $\text{C}_{17}\text{H}_{14}\text{BrN}_3\text{O}+\text{H}^+$ : 356.0393, found: 356.0393.

### 3-(4-bromo-5-phenyl-2H-1,2,3-triazol-2-yl)-1-(2-chlorophenyl)propan-1-one (4b)

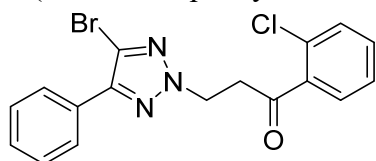

Yellow oil (316 mg, 81%),  $R_f = 0.6$  (petroleum/ethyl acetate = 5:1),  $^1\text{H NMR}$  (400 MHz,  $\text{CDCl}_3$ )  $\delta$  7.91 – 7.86 (m, 2H), 7.58 – 7.53 (m, 1H), 7.46 – 7.39 (m, 5H), 7.36 – 7.30 (m, 1H), 4.88 (t,  $J = 6.9$  Hz, 2H), 3.72 (t,  $J = 6.9$  Hz, 2H).  $^{13}\text{C NMR}$  (100 MHz,  $\text{CDCl}_3$ )  $\delta$  199.0, 145.4, 138.2, 132.3, 130.7, 129.5, 129.0, 128.8, 128.5, 127.2, 127.2, 127.0, 119.6, 50.5, 41.6. **HRMS** (ESI-MS)  $m/z$   $[\text{M}+\text{H}]^+$  calcd for  $\text{C}_{17}\text{H}_{13}\text{BrClN}_3\text{O}+\text{H}^+$ : 390.0003, found: 390.0002.

### 3-(4-bromo-5-phenyl-2H-1,2,3-triazol-2-yl)-1-(4-methoxyphenyl)propan-1-one (4c)

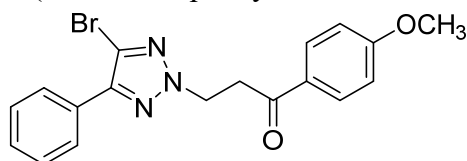

Yellow solid (328.1 mg, 85%), m.p. 131-132 °C,  $R_f = 0.6$  (petroleum/ethyl acetate = 5:1),  $^1\text{H NMR}$  (400 MHz,  $\text{CDCl}_3$ )  $\delta$  8.00 – 7.85 (m, 4H), 7.47 – 7.36 (m, 3H), 6.93 (d,  $J = 8.9$  Hz, 2H), 4.87 (t,  $J = 7.3$  Hz, 2H), 3.85 (s, 3H), 3.68 (t,  $J = 7.2$  Hz, 2H).  $^{13}\text{C NMR}$  (100 MHz,  $\text{CDCl}_3$ )  $\delta$  194.7, 163.8, 145.2, 130.3, 129.2, 129.0, 128.7, 128.5, 127.1, 119.4, 113.8, 55.4, 50.8, 37.2. **HRMS** (ESI-MS)  $m/z$   $[\text{M}+\text{H}]^+$  calcd for  $\text{C}_{18}\text{H}_{16}\text{BrN}_3\text{O}_2+\text{H}^+$ : 386.0499, found: 386.0497.

3-(4-bromo-5-phenyl-2H-1,2,3-triazol-2-yl)-1-(naphthalen-2-yl)propan-1-one (**4d**)

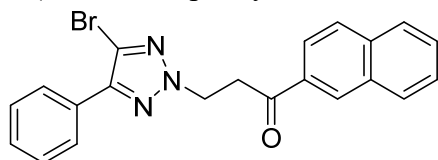

White solid (337.1 mg, 83%), m.p. 104-105 °C,  $R_f = 0.6$  (petroleum/ethyl acetate = 5:1),  $^1\text{H NMR}$  (400 MHz,  $\text{CDCl}_3$ )  $\delta$  8.69 (d,  $J = 8.6$  Hz, 1H), 8.04 – 7.98 (m, 1H), 7.97 – 7.92 (m, 1H), 7.91 – 7.86 (m, 3H), 7.63 – 7.47 (m, 3H), 7.46 – 7.36 (m, 3H), 4.97 (t,  $J = 6.9$  Hz, 2H), 3.82 (t,  $J = 6.9$  Hz, 2H),  $^{13}\text{C NMR}$  (100 MHz,  $\text{CDCl}_3$ )  $\delta$  199.9, 145.3, 134.6, 133.9, 133.4, 130.1, 129.0, 128.8, 128.5, 128.4, 128.2, 128.2, 127.2, 126.6, 125.8, 124.3, 119.5, 50.9, 40.4. **HRMS** (ESI-MS)  $m/z$   $[\text{M}+\text{H}]^+$  calcd for  $\text{C}_{21}\text{H}_{16}\text{BrN}_3\text{O}+\text{H}^+$ : 406.0550, found: 406.0546.

3-(4-benzoyl-5-phenyl-2H-1,2,3-triazol-2-yl)-1-phenylpropan-1-one (**4e**)

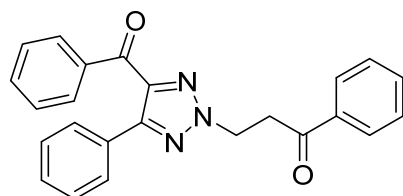

White solid (328.7 mg, 84%), m.p. 98-99 °C,  $R_f = 0.6$  (petroleum/ethyl acetate = 5:1),  $^1\text{H NMR}$  (400 MHz,  $\text{CDCl}_3$ )  $\delta$  8.06 – 7.95 (m, 4H), 7.86 – 7.77 (m, 2H), 7.64 – 7.52 (m, 2H), 7.50 – 7.44 (m, 2H), 7.44 – 7.37 (m, 5H), 5.00 (t,  $J = 7.0$  Hz, 2H), 3.79 (t,  $J = 7.0$  Hz, 2H).  $^{13}\text{C NMR}$  (100 MHz,  $\text{CDCl}_3$ )  $\delta$  196.2, 187.7, 149.7, 141.8, 137.2, 136.1, 133.6, 133.2, 130.3, 129.6, 129.0, 128.7, 128.6, 128.3, 128.2, 128.0, 50.4, 37.4. **HRMS** (ESI-MS)  $m/z$   $[\text{M}+\text{H}]^+$  calcd for  $\text{C}_{24}\text{H}_{19}\text{N}_3\text{O}_2+\text{H}^+$ : 382.1550, found: 382.1542.

3-(4-nitro-5-phenyl-2H-1,2,3-triazol-2-yl)-1-phenylpropan-1-one (**4f**)

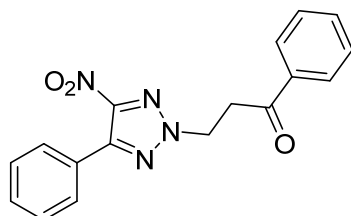

Yellow oil (268.1 mg, 83%),  $^1\text{H NMR}$  (400 MHz,  $\text{CDCl}_3$ )  $\delta$  7.96 (dd,  $J = 7.4, 2.9$  Hz, 2H), 7.71 (dd,  $J = 5.1, 2.6$  Hz, 2H), 7.62 – 7.54 (m, 1H), 7.51 – 7.38 (m, 5H), 5.05 – 4.86 (m, 2H), 3.80 (t,  $J = 6.3$  Hz, 2H).  $^{13}\text{C NMR}$  (100 MHz,  $\text{CDCl}_3$ )  $\delta$  195.5, 149.0,



142.8, 135.7, 133.6, 129.9, 129.1, 128.6, 128.3, 127.9, 126.9, 51.3, 36.8. **HRMS** (ESI-MS)  $m/z$   $[M+H]^+$  calcd for  $C_{17}H_{14}N_4O_3+H^+$ : 323.1139, found: 323.1139.

3-(4-chloro-5-phenyl-2H-1,2,3-triazol-2-yl)-1-phenylpropan-1-one (**4g**)

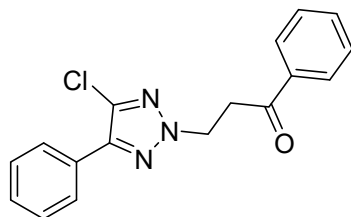

White solid (252.7 mg, 81%),  **$^1H$  NMR** (400 MHz,  $CDCl_3$ )  $\delta$  8.12 – 7.82 (m, 4H), 7.67 – 7.52 (m, 1H), 7.52 – 7.30 (m, 5H), 4.87 (t,  $J = 6.7$  Hz, 2H), 3.74 (t,  $J = 6.7$  Hz, 2H).  **$^{13}C$  NMR** (100 MHz,  $CDCl_3$ )  $\delta$  196.2, 142.8, 136.1, 133.6, 133.0, 128.7, 128.6, 128.0, 126.9, 50.6, 37.5. **HRMS** (ESI-MS)  $m/z$   $[M+H]^+$  calcd for  $C_{17}H_{14}ClN_3O+H^+$ : 312.0898, found: 312.0900

2-(3-oxo-3-phenylpropyl)-5-phenyl-2H-1,2,3-triazole-4-carbonitrile (**4h**)

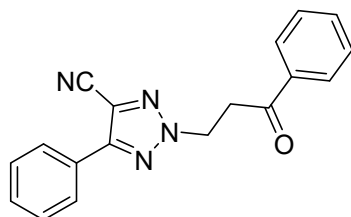

**$^1H$  NMR** (400 MHz,  $CDCl_3$ )  $\delta$  8.02 – 7.92 (m, 4H), 7.62 (t,  $J = 7.4$  Hz, 1H), 7.48 (dt,  $J = 11.9, 6.4$  Hz, 5H), 4.98 (t,  $J = 7.0$  Hz, 2H), 3.80 (t,  $J = 7.0$  Hz, 2H).  **$^{13}C$  NMR** (100 MHz,  $CDCl_3$ )  $\delta$  195.75, 151.08, 135.91, 133.82, 130.15, 129.11, 128.81, 128.07, 127.47, 126.66, 112.61, 51.03, 37.15. **HRMS** (ESI-MS)  $m/z$   $[M+H]^+$  calcd for  $C_{18}H_{14}N_4O+H^+$ : 303.1240, found: 303.1243

3-(4-iodo-5-phenyl-2H-1,2,3-triazol-2-yl)-1-phenylpropan-1-one (**4i**)

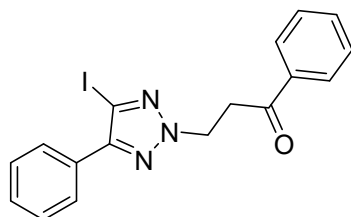

White solid (354.6 mg, 88%),  **$^1H$  NMR** (400 MHz,  $CDCl_3$ )  $\delta$  8.17 – 7.74 (m, 4H), 7.59 (s, 1H), 7.53 – 7.32 (m, 5H), 4.93 (t,  $J = 6.4$  Hz, 2H), 3.75 (t,  $J = 6.3$  Hz, 2H).  **$^{13}C$  NMR** (100 MHz,  $CDCl_3$ )  $\delta$  196.3, 136.1, 133.6, 129.6, 128.8, 128.7, 128.5, 128.1, 127.6, 88.6, 50.6, 37.8. **HRMS** (ESI-MS)  $m/z$   $[M+H]^+$  calcd for  $C_{17}H_{14}IN_3O+H^+$ : 404.0254, found: 404.0259

1-phenyl-3-(4-phenyl-5-(trifluoromethyl)-2H-1,2,3-triazol-2-yl)propan-1-one (**4j**)

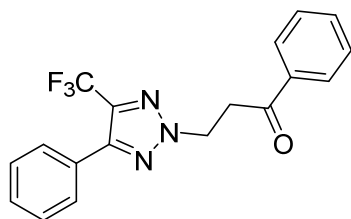

**<sup>1</sup>H NMR** (400 MHz, CDCl<sub>3</sub>) δ 7.99 (d, *J* = 7.7 Hz, 2H), 7.67 (d, *J* = 7.5 Hz, 2H), 7.51 – 7.44 (m, 5H), 4.97 (t, *J* = 7.2 Hz, 2H), 3.79 (t, *J* = 7.2 Hz, 2H). **<sup>13</sup>C NMR** (100 MHz, CDCl<sub>3</sub>) δ 196.06, 146.26, 136.05, 133.71, 129.38, 128.77, 128.66, 128.43, 128.21, 128.20, 128.08, 120.99 (d, *J* = 268.6 Hz), 50.63, 37.53. **HRMS** (ESI-MS) *m/z* [M+Na]<sup>+</sup> calcd for C<sub>18</sub>H<sub>14</sub>F<sub>3</sub>N<sub>3</sub>O+Na<sup>+</sup>: 368.0981, found: 368.0986

ethyl 2-(3-oxo-3-phenylpropyl)-5-phenyl-2H-1,2,3-triazole-4-carboxylate (**4k**)

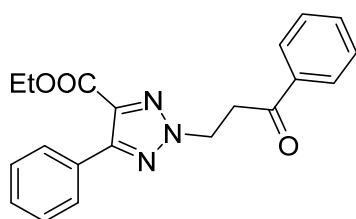

Yellow oil (280.1 mg, 80%), **<sup>1</sup>H NMR** (400 MHz, CDCl<sub>3</sub>) δ 8.02 – 7.94 (m, 2H), 7.85 – 7.77 (m, 2H), 7.63 – 7.56 (m, 1H), 7.49 (t, *J* = 7.6 Hz, 2H), 7.42 (d, *J* = 7.8 Hz, 3H), 5.06 – 4.91 (m, 2H), 4.40 (t, *J* = 7.1 Hz, 2H), 3.81 (dd, *J* = 8.4, 5.7 Hz, 2H), 1.43 – 1.32 (m, 3H). **<sup>13</sup>C NMR** (100 MHz, CDCl<sub>3</sub>) δ 196.1, 161.1, 149.9, 136.1, 135.8, 133.6, 129.4, 129.1, 129.1, 128.7, 128.0, 61.4, 50.7, 37.7, 14.1. **HRMS** (ESI-MS) *m/z* [M+H]<sup>+</sup> calcd for C<sub>20</sub>H<sub>19</sub>N<sub>3</sub>O<sub>3</sub>+H<sup>+</sup>: 350.1499, found: 350.1501.

ethyl 5-(2-nitrophenyl)-2-(3-oxo-3-phenylpropyl)-2H-1,2,3-triazole-4-carboxylate (**4l**)

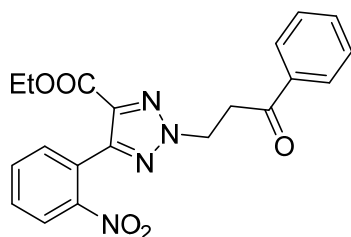

Yellow oil (327.8 mg, 83%), **<sup>1</sup>H NMR** (400 MHz, CDCl<sub>3</sub>) δ 8.14 (d, *J* = 7.8 Hz, 1H), 8.03 – 7.90 (m, 2H), 7.71 – 7.63 (m, 1H), 7.58 (s, 2H), 7.55 – 7.42 (m, 3H), 5.00 (t, *J* = 7.0 Hz, 2H), 4.26 (d, *J* = 7.0 Hz, 2H), 3.81 (t, *J* = 7.0 Hz, 2H), 1.22 (t, *J* = 7.0 Hz, 3H). **<sup>13</sup>C NMR** (100 MHz, CDCl<sub>3</sub>) δ 196.0, 160.3, 148.7, 136.0, 133.7, 132.9, 132.5, 130.1, 128.7, 128.1, 125.4, 124.5, 61.6, 50.9, 37.7, 13.9. **HRMS** (ESI-MS) *m/z* [M+H]<sup>+</sup> calcd for C<sub>20</sub>H<sub>18</sub>N<sub>4</sub>O<sub>5</sub>+H<sup>+</sup>: 395.1350, found: 395.1354

3-(4-(ethylsulfonyl)-5-phenyl-2H-1,2,3-triazol-2-yl)-1-phenylpropan-1-one (**4m**)

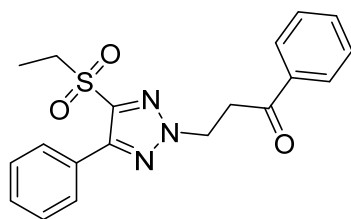

**<sup>1</sup>H NMR** (400 MHz, CDCl<sub>3</sub>) δ 7.99 (d, *J* = 7.8 Hz, 2H), 7.92 – 7.85 (m, 2H), 7.62 (t, *J* = 7.3 Hz, 1H), 7.52 – 7.44 (m, 5H), 4.99 (t, *J* = 7.2 Hz, 2H), 3.80 (t, *J* = 7.2 Hz, 2H), 3.28 (q, *J* = 7.2 Hz, 2H), 1.30 (t, *J* = 7.6 Hz, 3H). **<sup>13</sup>C NMR** (100 MHz, CDCl<sub>3</sub>) δ 195.90, 147.53, 135.98, 133.82, 133.00, 129.81, 129.11, 128.83, 128.57, 128.08, 127.89, 50.99, 49.92, 37.33, 6.88. **HRMS** (ESI-MS) *m/z* [M+Na]<sup>+</sup> calcd for C<sub>19</sub>H<sub>20</sub>N<sub>3</sub>O<sub>3</sub>S+Na<sup>+</sup>: 392.1039.1220, found: 392.1041

N-((4,5-diphenyl-2H-1,2,3-triazol-2-yl)methyl)-N-methylformamide (**5**)

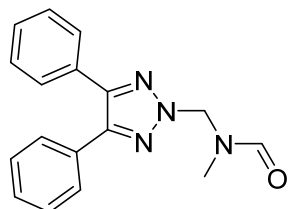

White solid (87%, 229 mg). Mp: 105–107 °C. **<sup>1</sup>H NMR** (400 MHz, CDCl<sub>3</sub>) δ 8.52 (s, 1H), 7.55 – 7.52 (m, 4H), 7.38 – 7.35 (m, 6H), 5.86 (d, *J* = 121.5 Hz, 2H), 3.11 – 3.00 (m, 3H). **<sup>13</sup>C NMR** (100 MHz, CDCl<sub>3</sub>) δ 186.9, 163.1, 162.9, 145.9, 145.5, 130.6, 130.5, 130.2, 128.7, 128.6, 128.6, 128.5, 128.5, 128.4, 128.4, 128.3, 128.3, 128.2, 128.2, 128.2, 67.1, 60.8, 33.8, 29.7.

1-phenylprop-2-en-1-one (**6**)

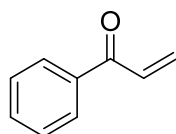

Yellow oil (112mg, 85%), *R<sub>f</sub>* = 0.7 (petroleum/ethyl acetate = 20:1), **<sup>1</sup>H NMR** (400 MHz, CDCl<sub>3</sub>) δ 7.93 (dd, *J* = 8.4, 1.4 Hz, 2H), 7.58 – 7.51 (m, 1H), 7.48 – 7.40 (m, 2H), 7.14 (dd, *J* = 17.1, 10.6 Hz, 1H), 6.42 (dd, *J* = 17.2, 1.7 Hz, 1H), 5.90 (dd, *J* = 10.6, 1.7 Hz, 1H).

1-(4-bromophenyl)-3-(4-phenyl-2H-1,2,3-triazol-2-yl)propan-1-ol (**9**)

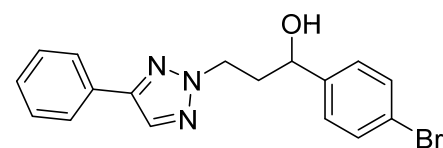

White solid (349 mg, 98%), **<sup>1</sup>H NMR** (400 MHz, CDCl<sub>3</sub>) δ 7.82 (s, 1H), 7.78 – 7.74 (m, 2H), 7.48 – 7.40 (m, 4H), 7.38 – 7.33 (m, 1H), 7.25 – 7.20 (m, 2H), 4.73 – 4.64 (m, 2H), 4.60 – 4.51 (m, 1H), 2.42 – 2.26 (m, 2H). **<sup>13</sup>C NMR** (100 MHz, CDCl<sub>3</sub>) δ 147.8,

142.7, 131.6, 130.9, 130.1, 128.9, 128.5, 127.4, 125.8, 121.4, 70.6, 51.7, 38.6. **HRMS** (ESI-MS)  $m/z$   $[M+Na]^+$  calcd for  $C_{17}H_{17}BrN_3O+ Na^+$ : 380.0369, found: 380.0372.

2-(3,3-diphenylpropyl)-4,5-diphenyl-2H-1,2,3-triazole (**10**)

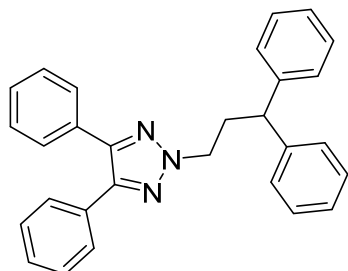

Colorless oil,  **$^1H$  NMR** (500 MHz,  $CDCl_3$ )  $\delta$  7.59 – 7.53 (m, 4H), 7.42 – 7.34 (m, 6H), 7.31 (d,  $J = 4.3$  Hz, 8H), 7.21 (d,  $J = 4.4$  Hz, 2H), 4.47 (t,  $J = 7.3$  Hz, 2H), 4.12 (t,  $J = 7.8$  Hz, 1H), 2.85 (q,  $J = 7.5$  Hz, 2H).  **$^{13}C$  NMR** (126 MHz,  $CDCl_3$ )  $\delta$  144.2, 143.6, 131.1, 128.6, 128.5, 128.2, 128.2, 127.8, 126.5, 53.6, 48.5, 35.5. **HRMS (ESI-MS)**  $m/z$   $[M+H]^+$  calcd for  $C_{29}H_{25}N_3+H^+$ : 416.2121, found: 416.2128.

## 6. NMR spectra

1-phenyl-3-(4-phenyl-2H-1,2,3-triazol-2-yl)propan-1-one (**3a**)

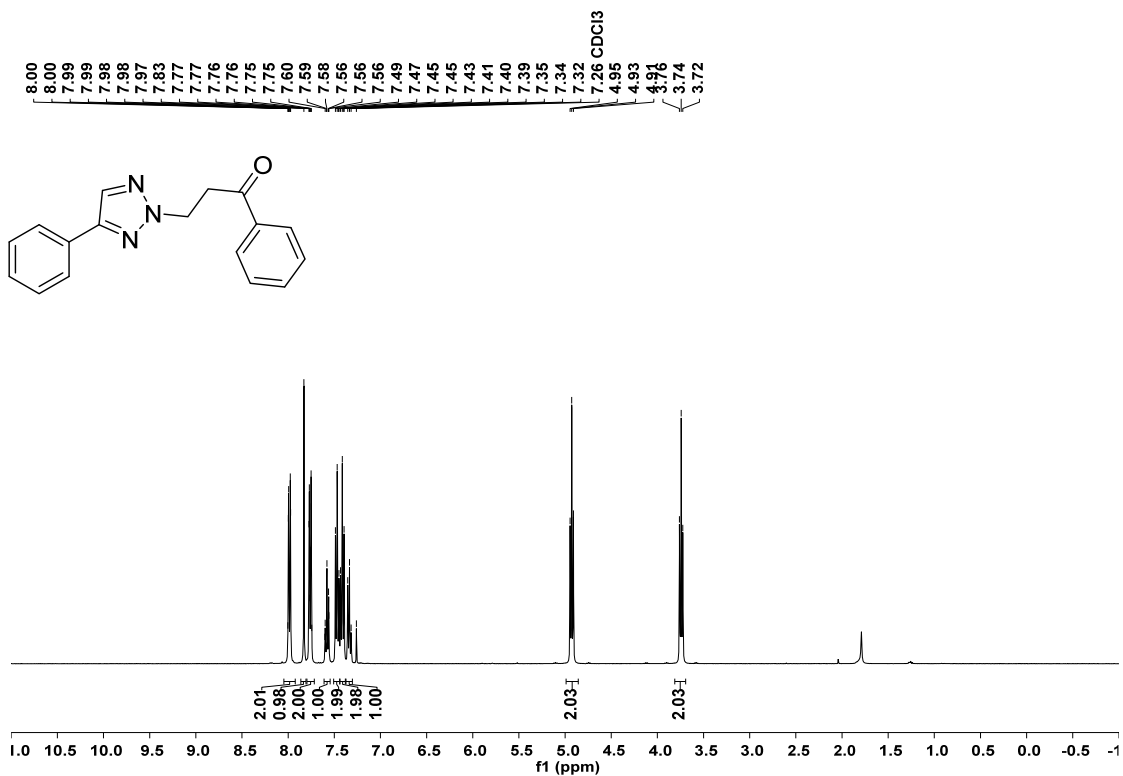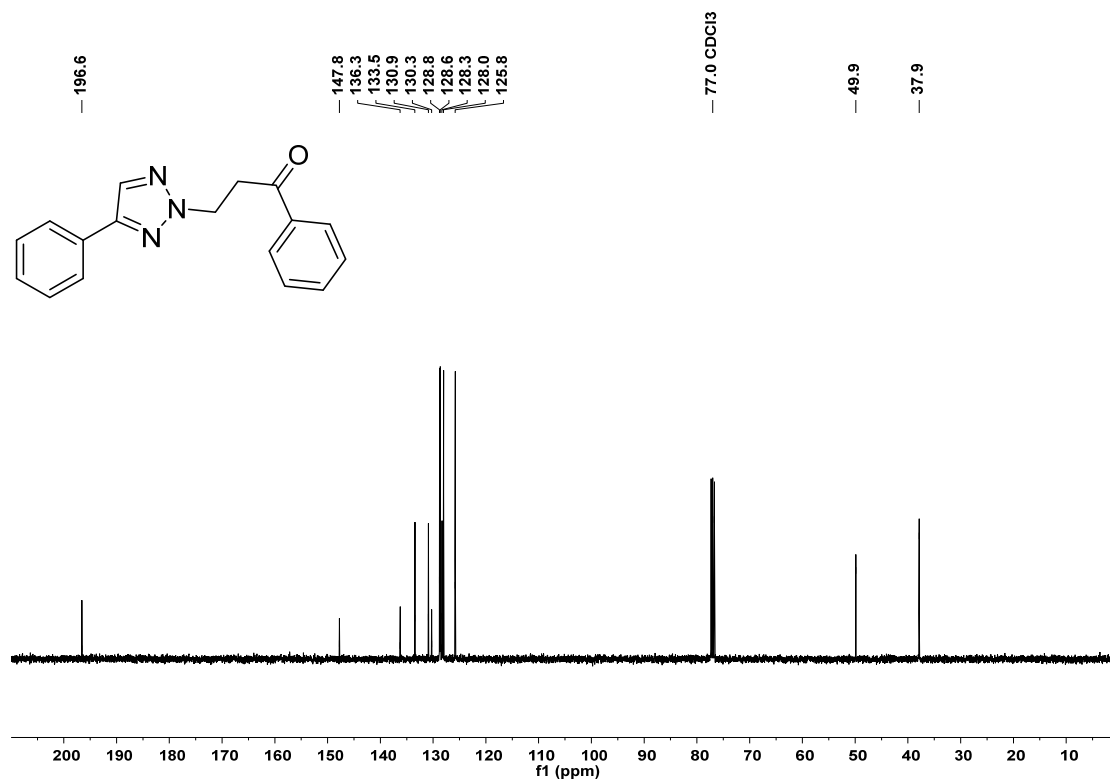

1-phenyl-3-(4-phenyl-1H-1,2,3-triazol-1-yl) propan-1-one (**3'a**)

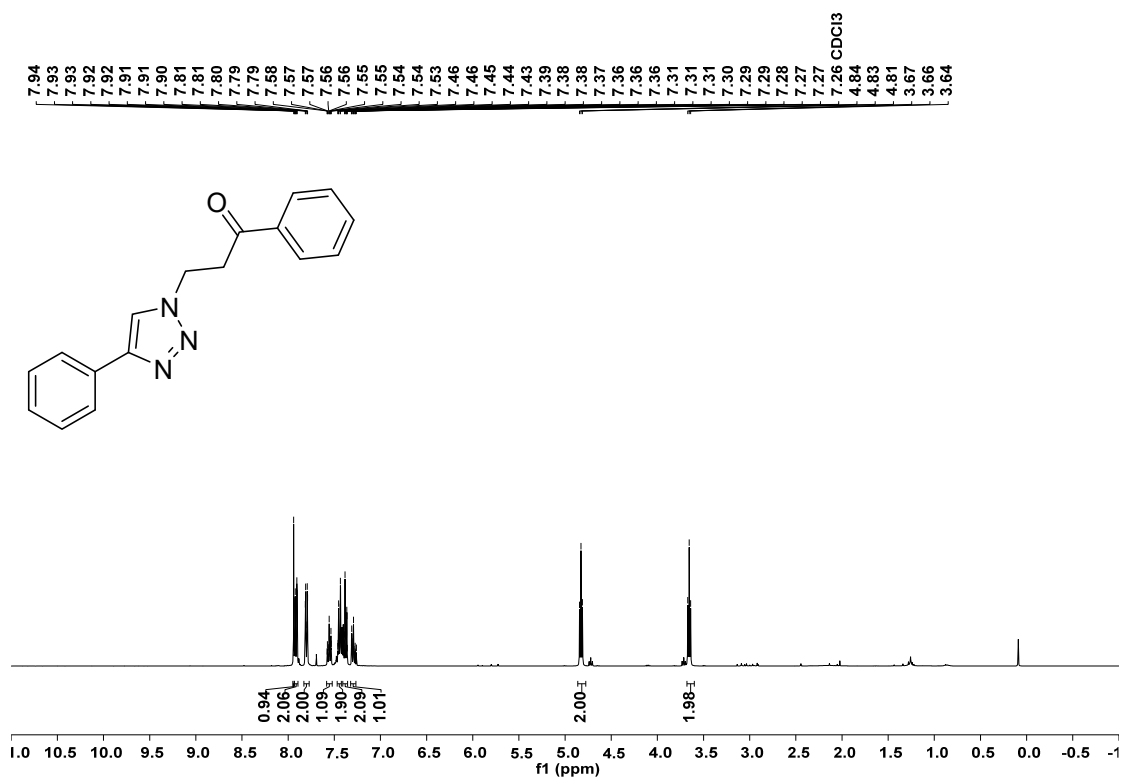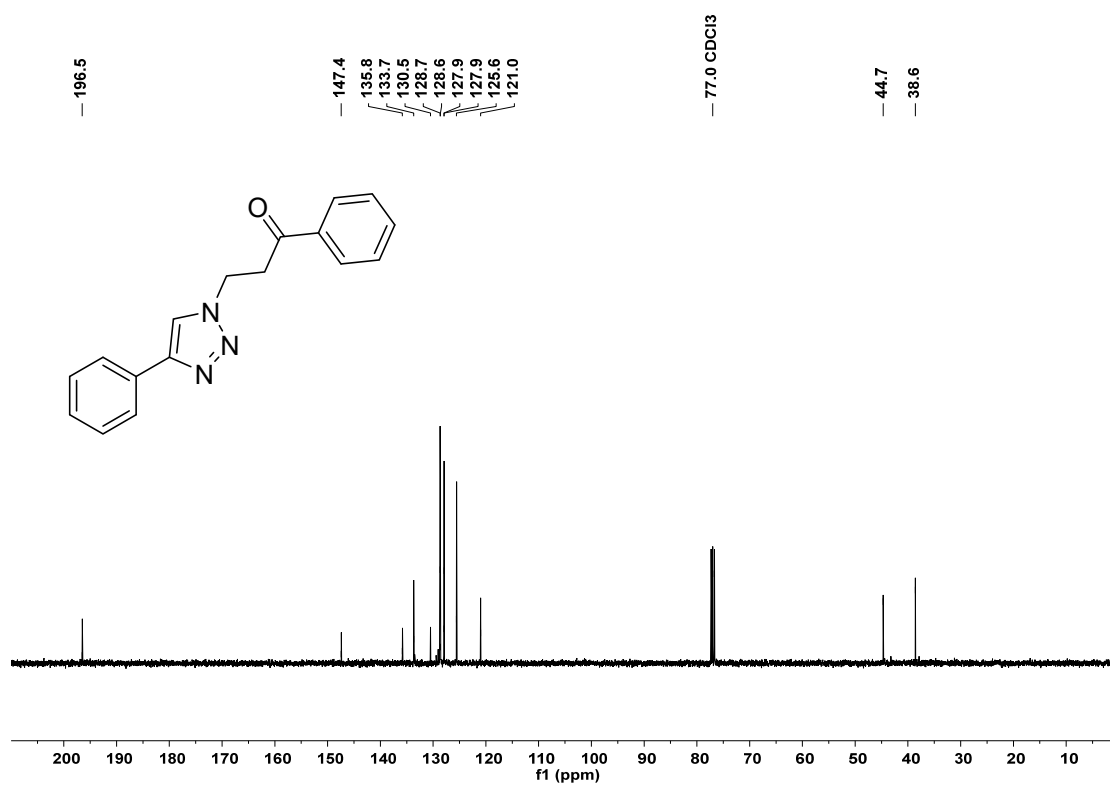

3-(4-phenyl-2H-1,2,3-triazol-2-yl)-1-(p-tolyl)propan-1-one (**3b**)

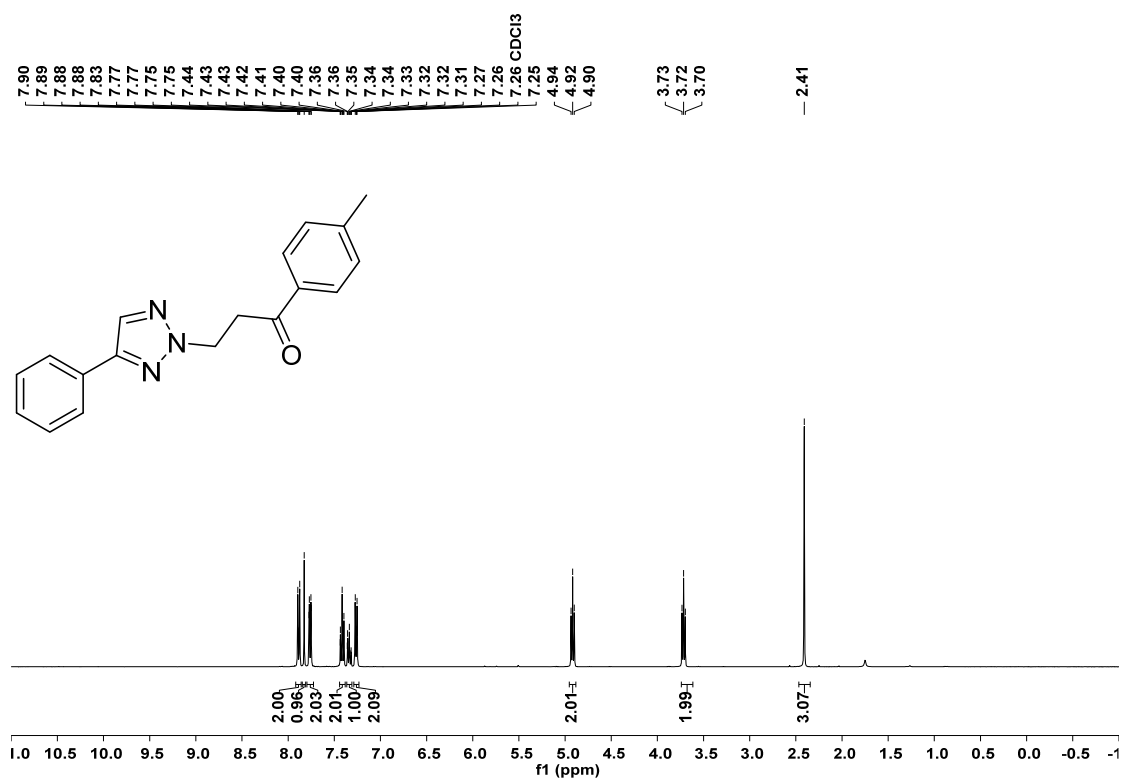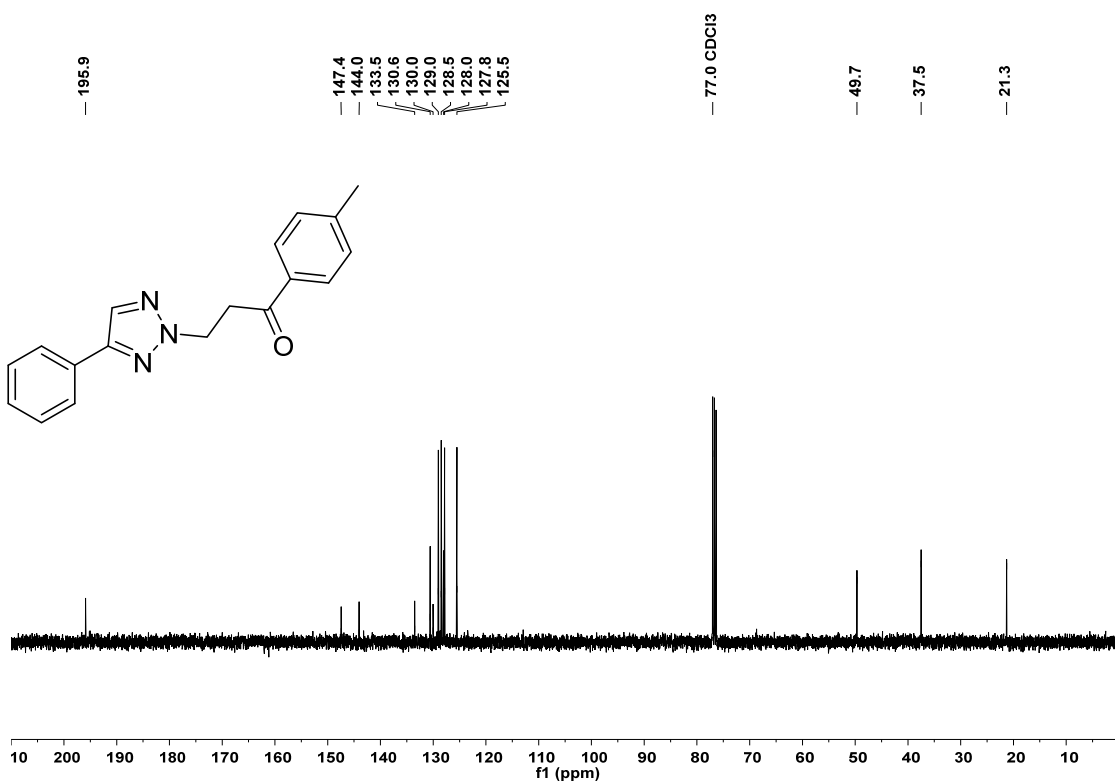

3-(4-phenyl-1H-1,2,3-triazol-1-yl)-1-(p-tolyl)propan-1-one (**3'b**)

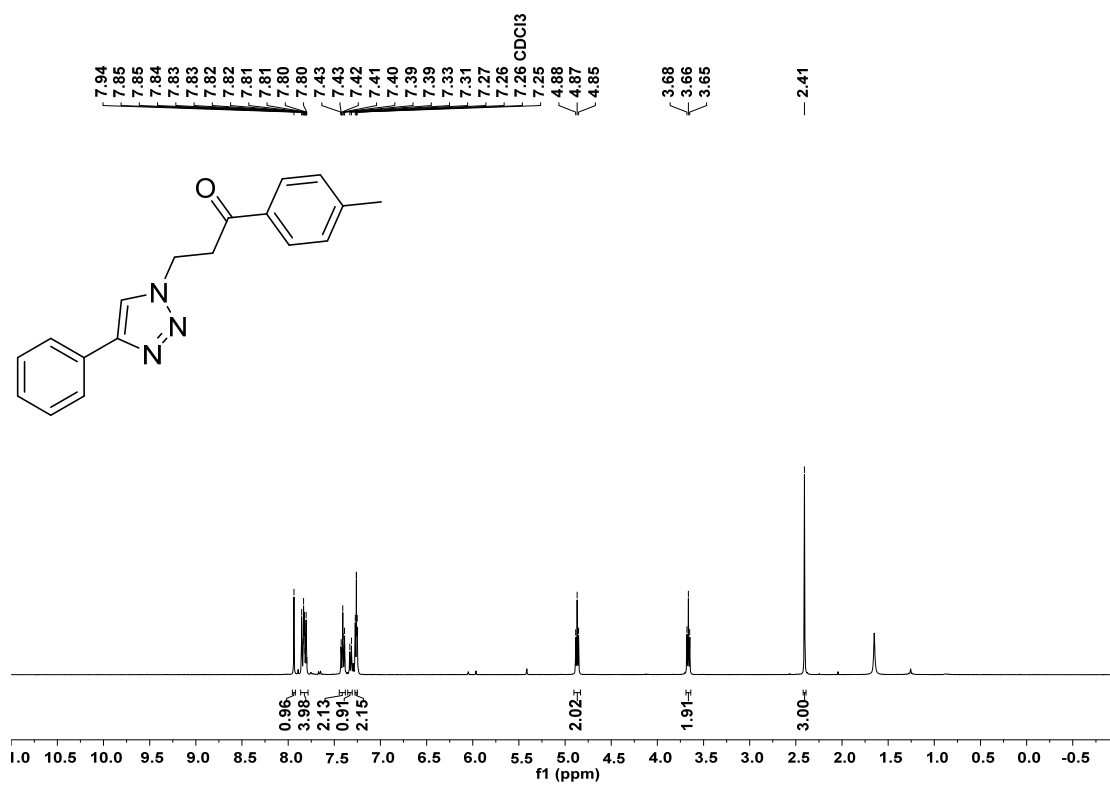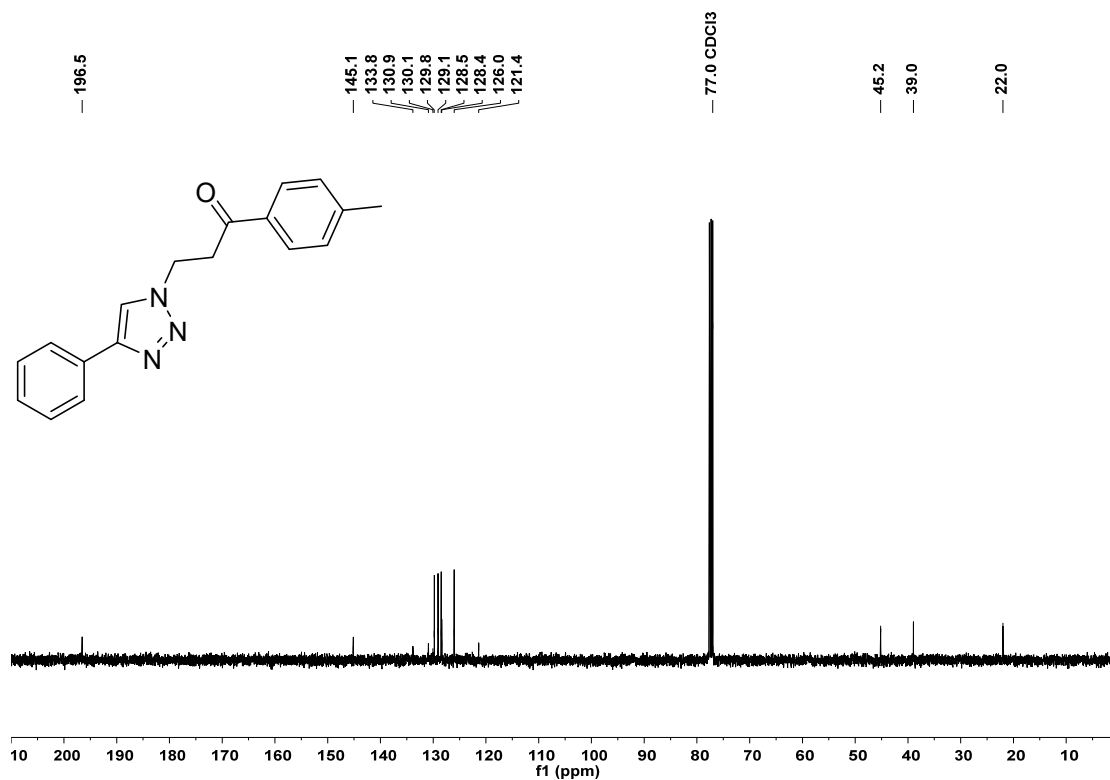



1-(4-methoxyphenyl)-3-(4-phenyl-2H-1,2,3-triazol-2-yl)propan-1-one (**3c**)

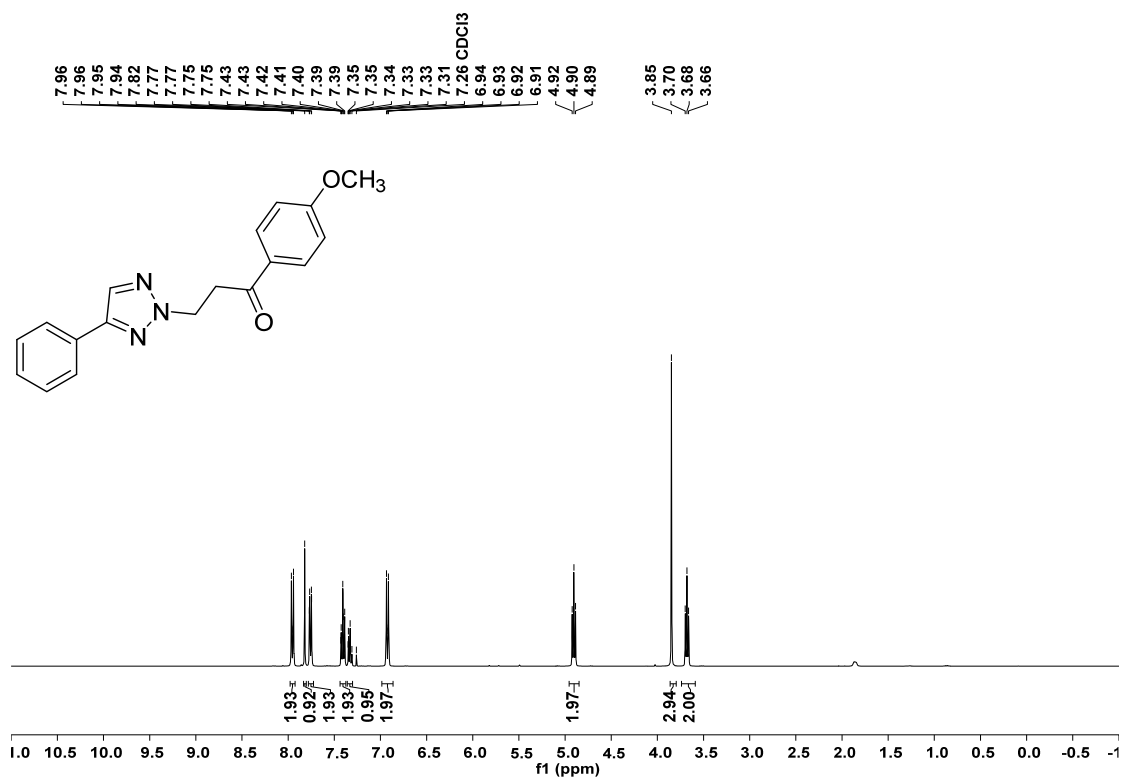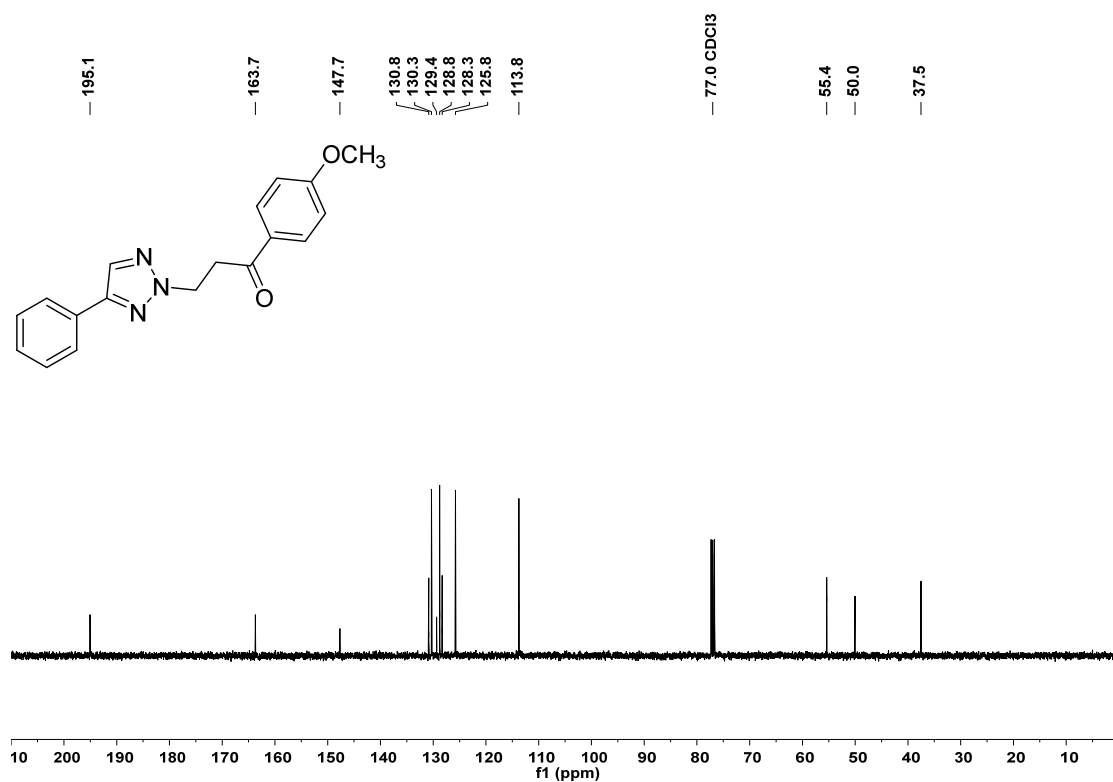

1-(4-methoxyphenyl)-3-(4-phenyl-1H-1,2,3-triazol-1-yl)propan-1-one (**3'c**)

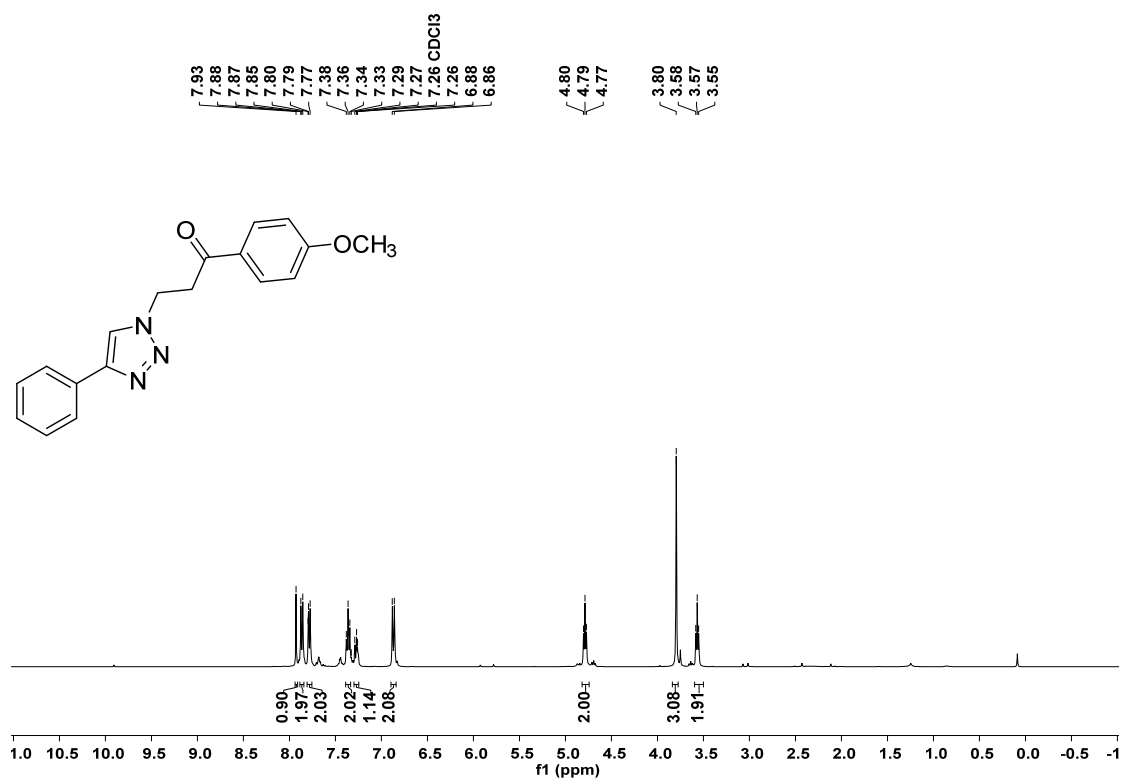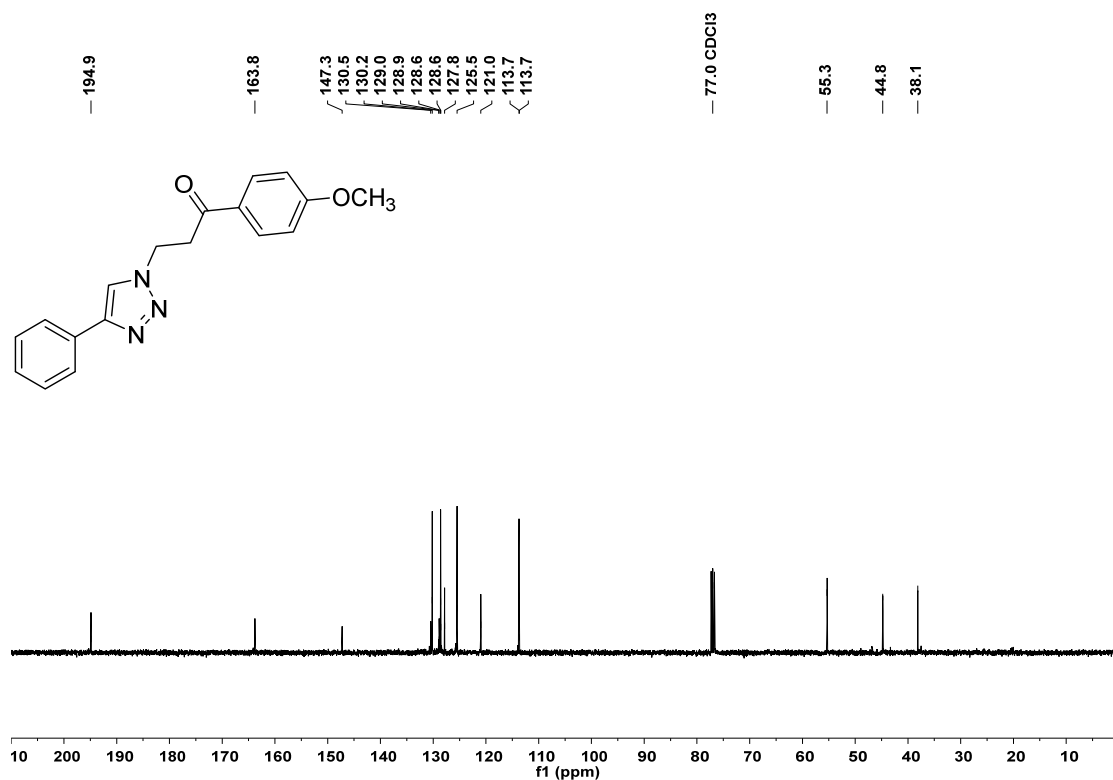

1-(4-chlorophenyl)-3-(4-phenyl-2H-1,2,3-triazol-2-yl)propan-1-one (**3d**)

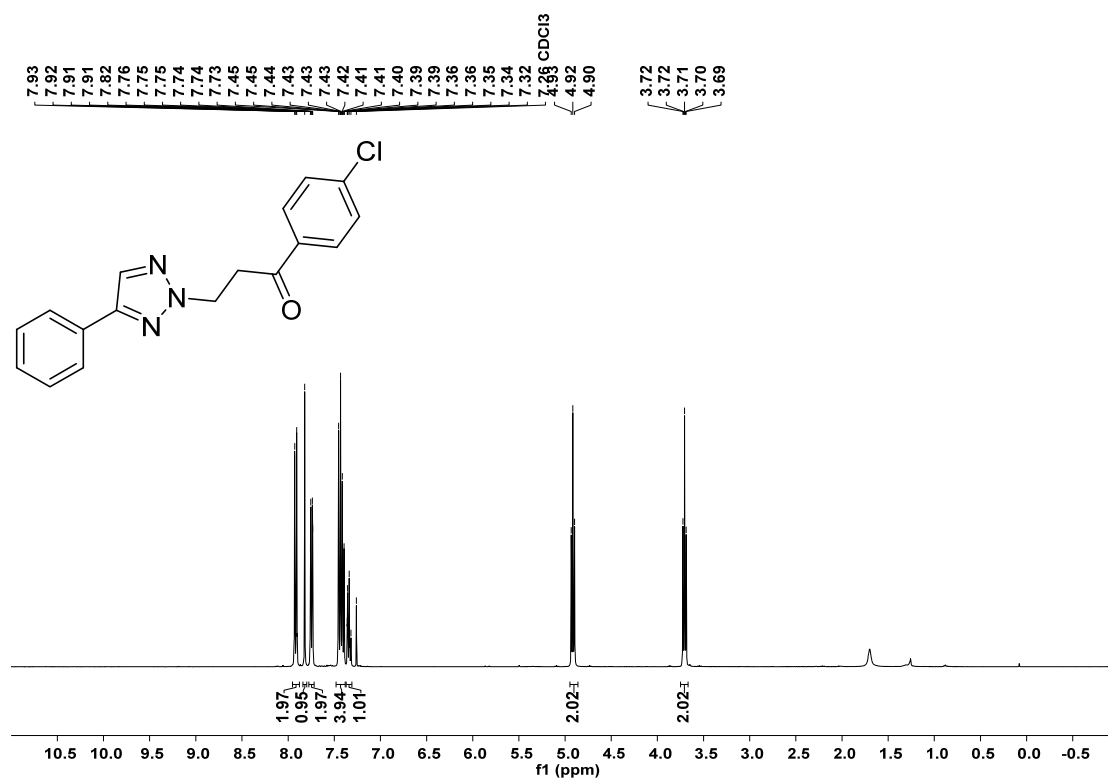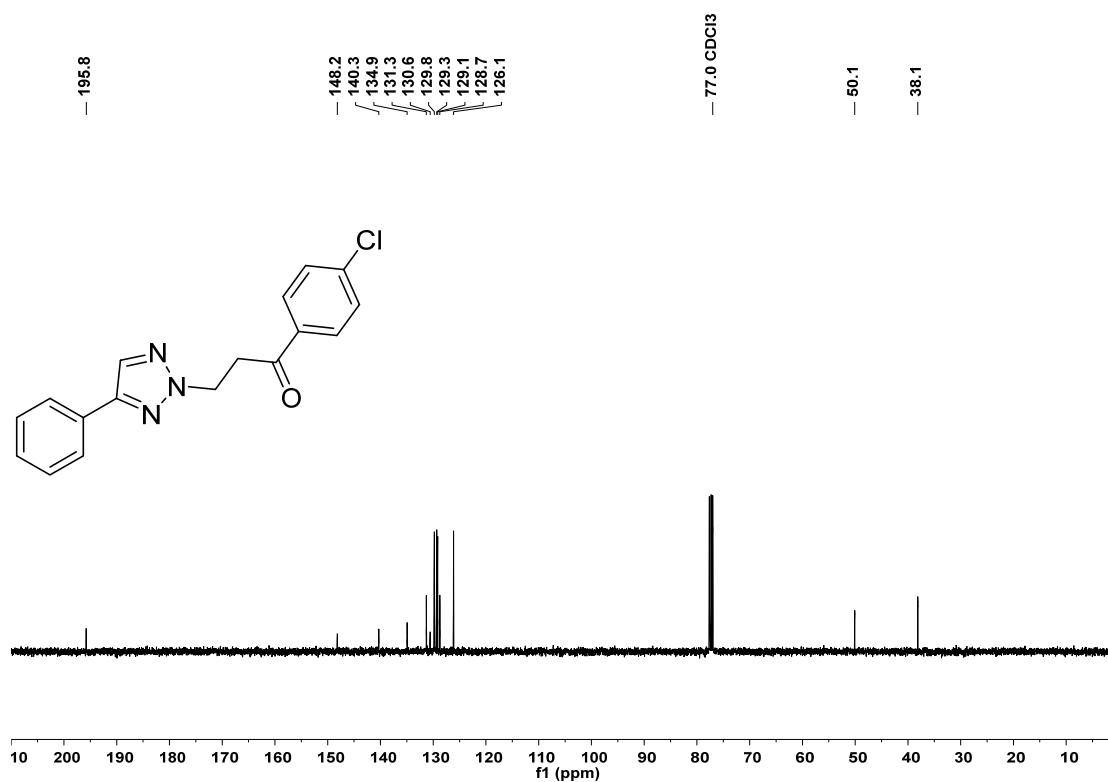

1-(4-chlorophenyl)-3-(4-phenyl-1H-1,2,3-triazol-1-yl)propan-1-one (**3'd**)

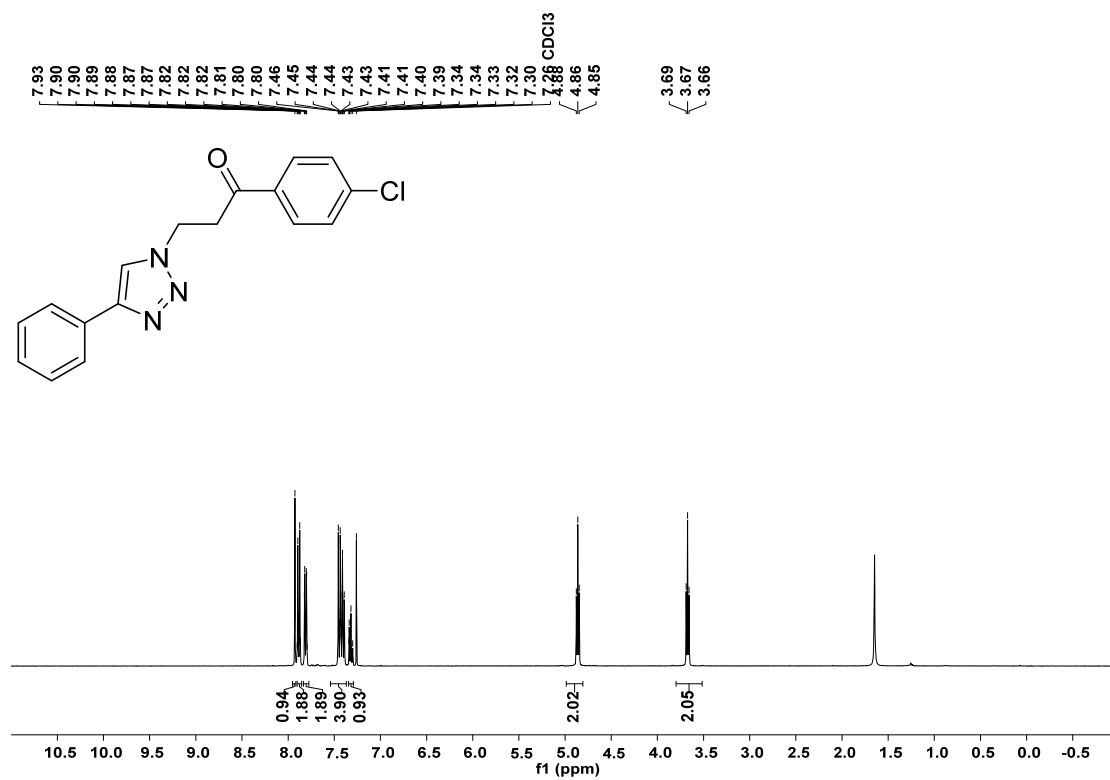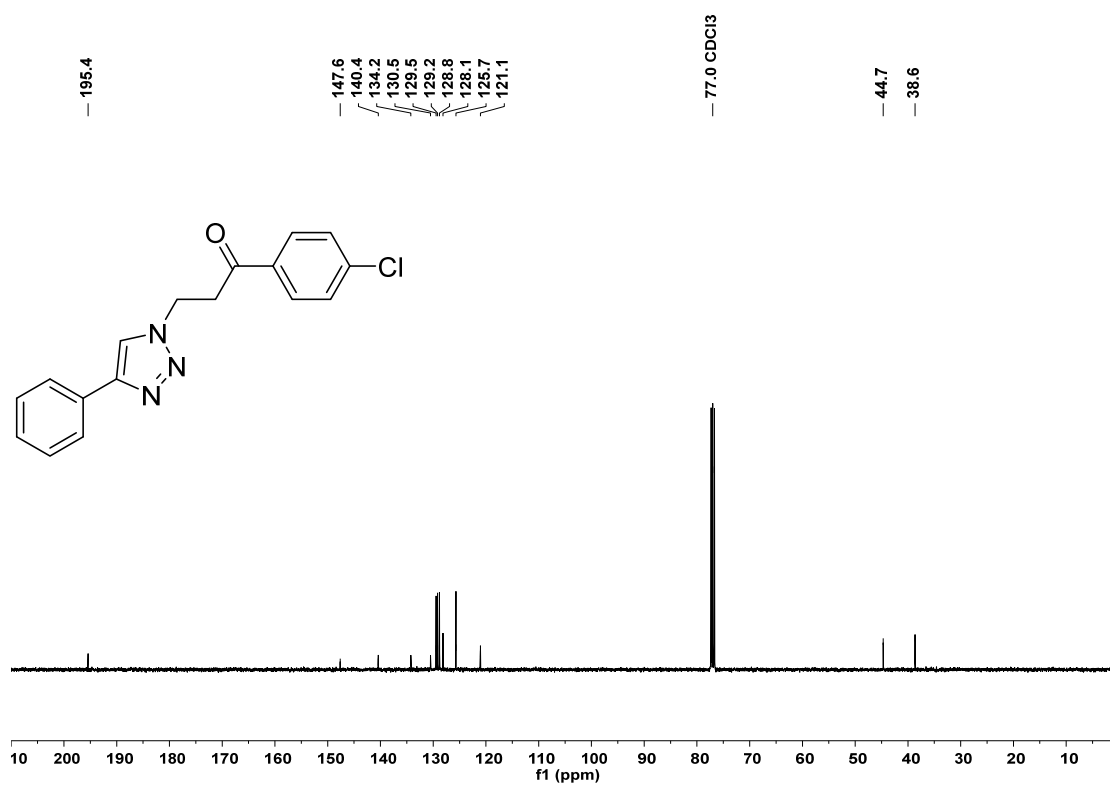

1-(4-bromophenyl)-3-(4-phenyl-2H-1,2,3-triazol-2-yl)propan-1-one (**3e**)

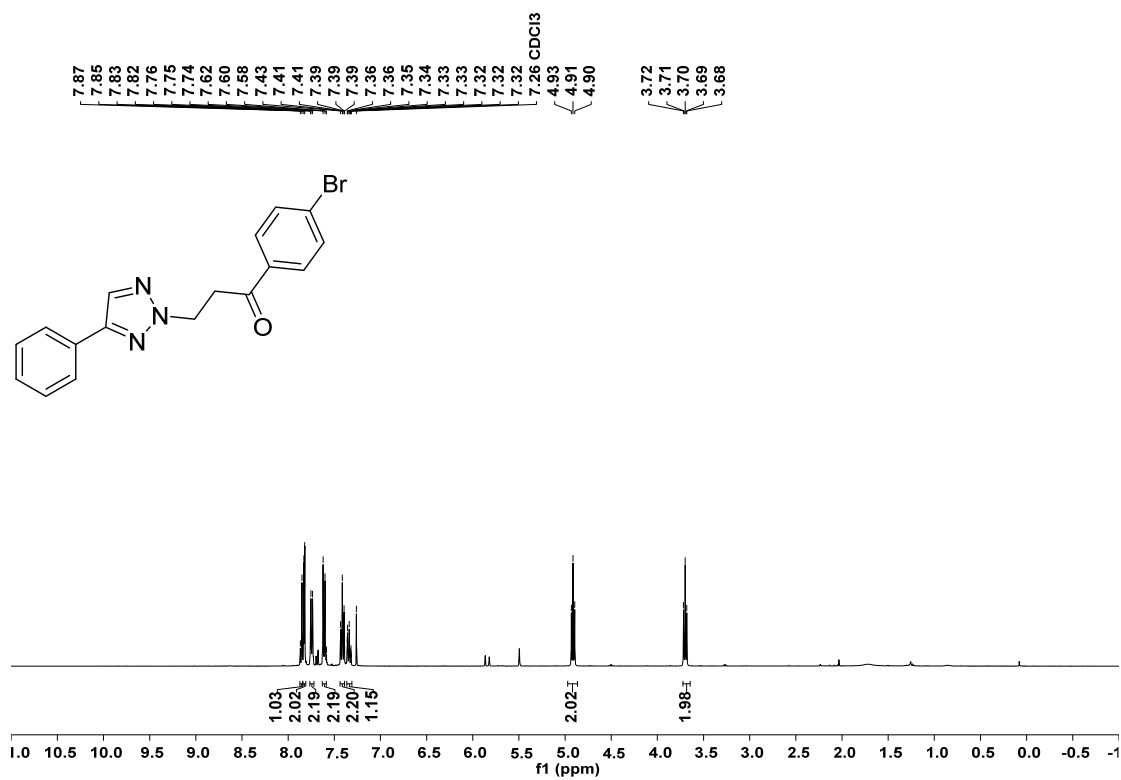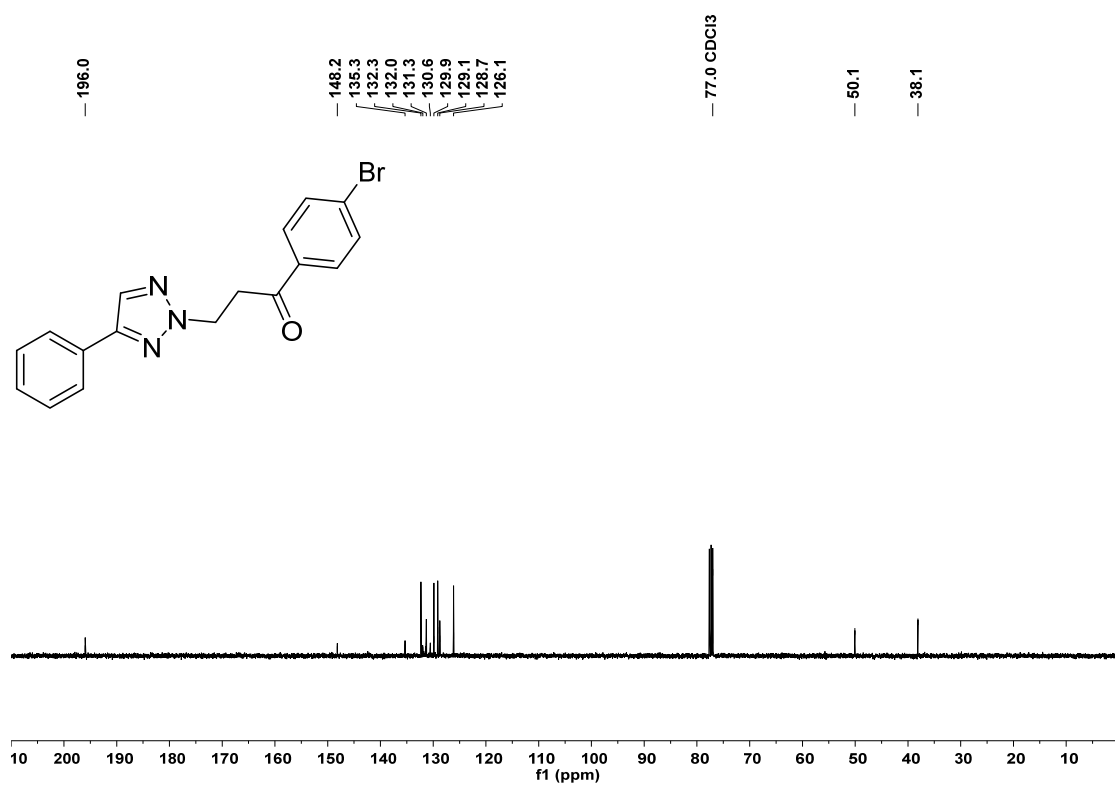

1-(4-bromophenyl)-3-(4-phenyl-1H-1,2,3-triazol-1-yl)propan-1-one (**3'e**)

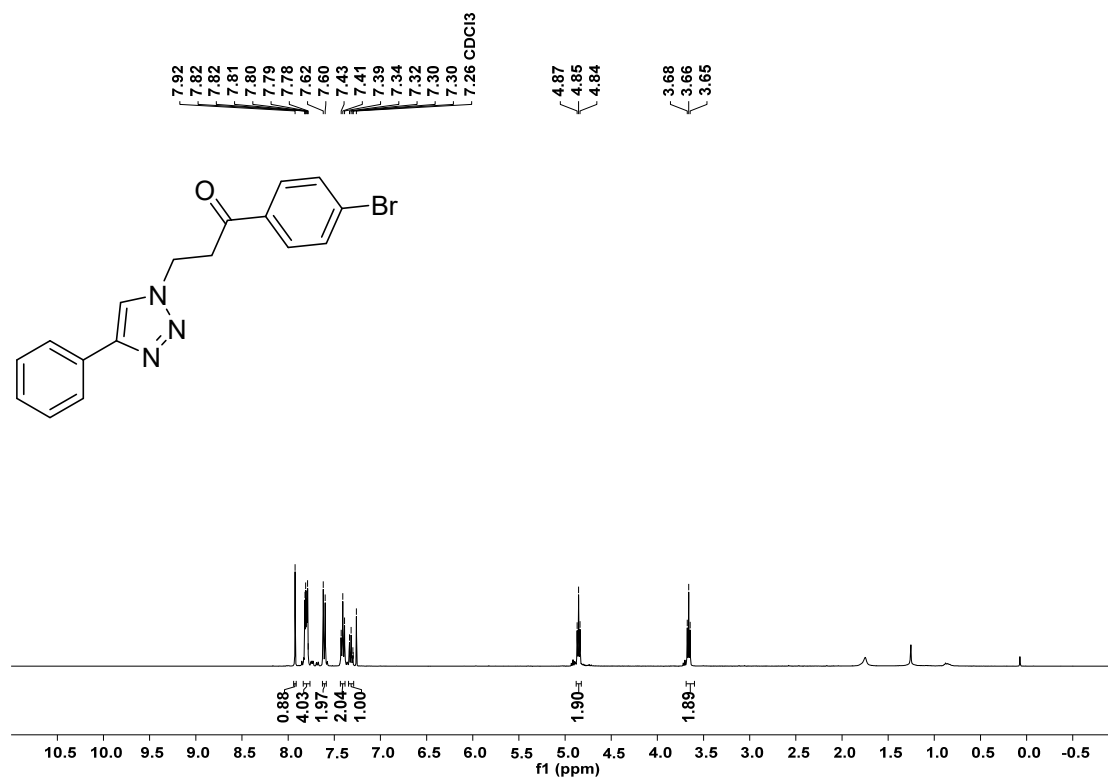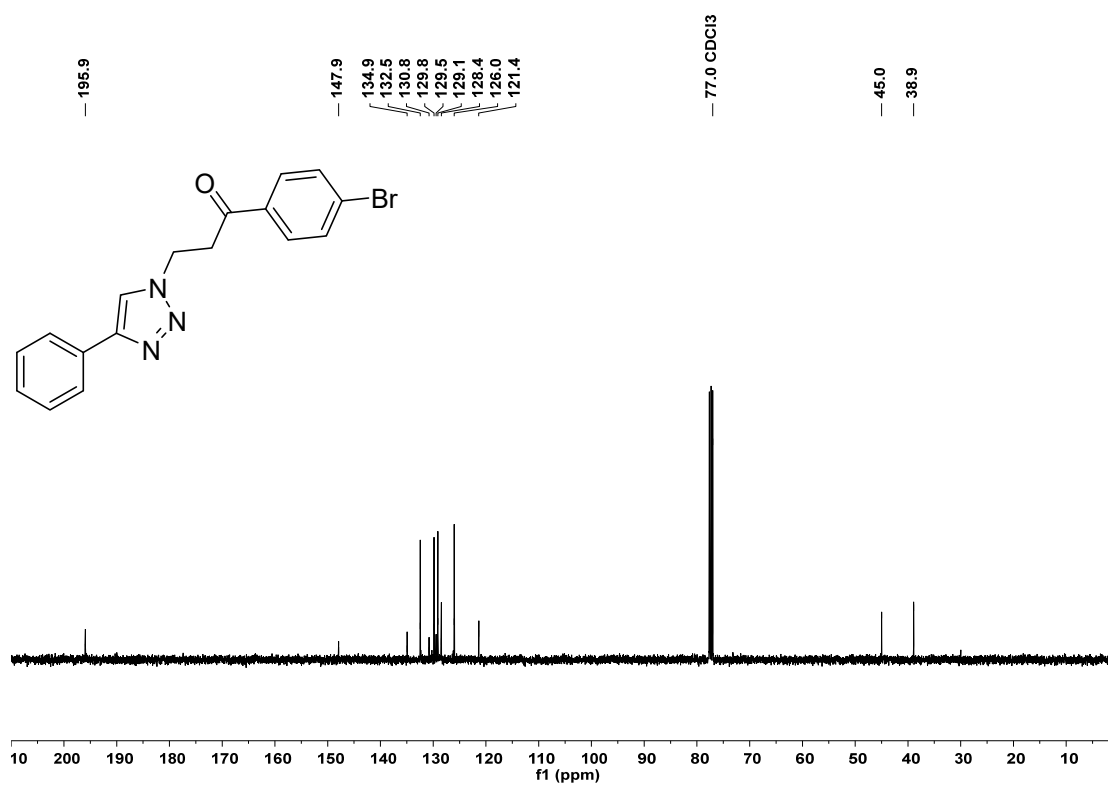

1-(3-bromophenyl)-3-(4-phenyl-2H-1,2,3-triazol-2-yl)propan-1-one (**3f**)

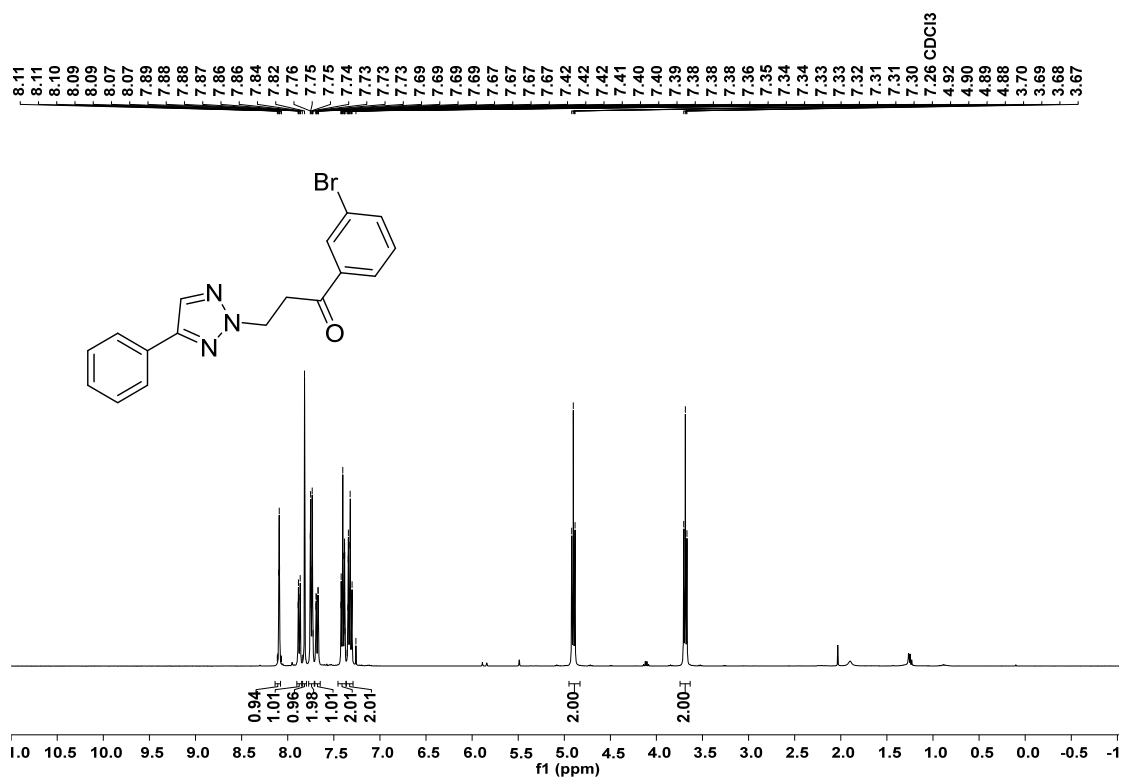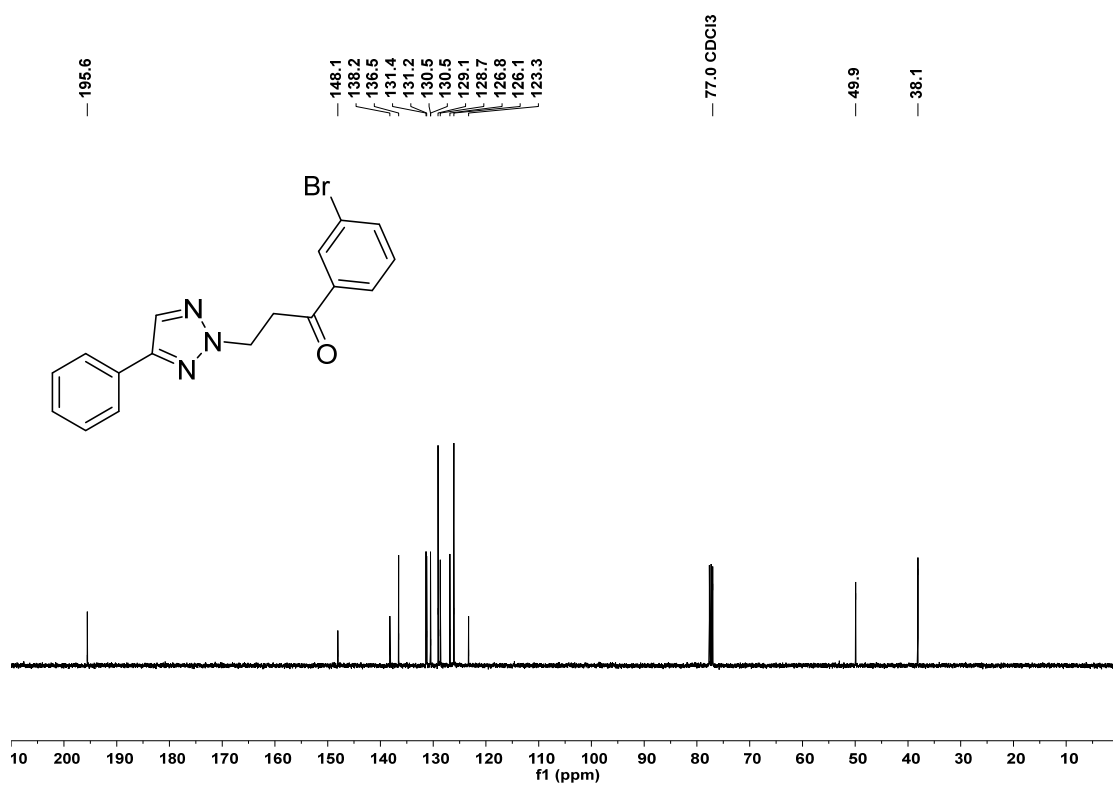

1-(3-bromophenyl)-3-(4-phenyl-1H-1,2,3-triazol-1-yl)propan-1-one (**3'f**)

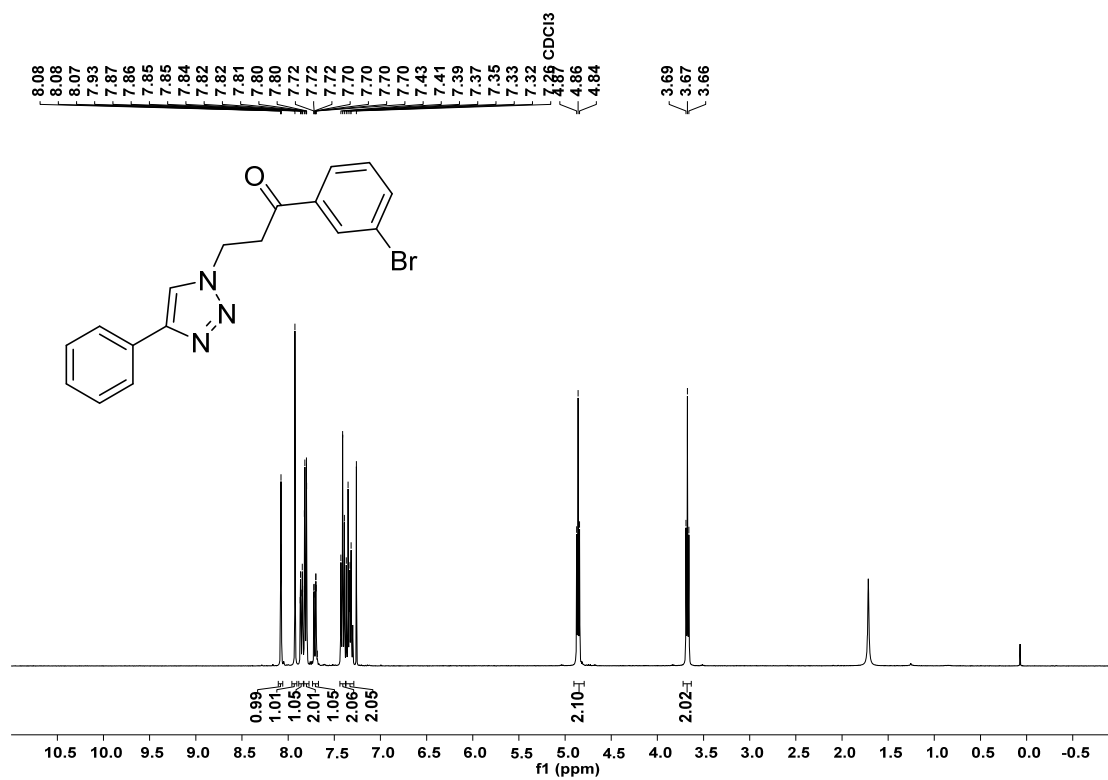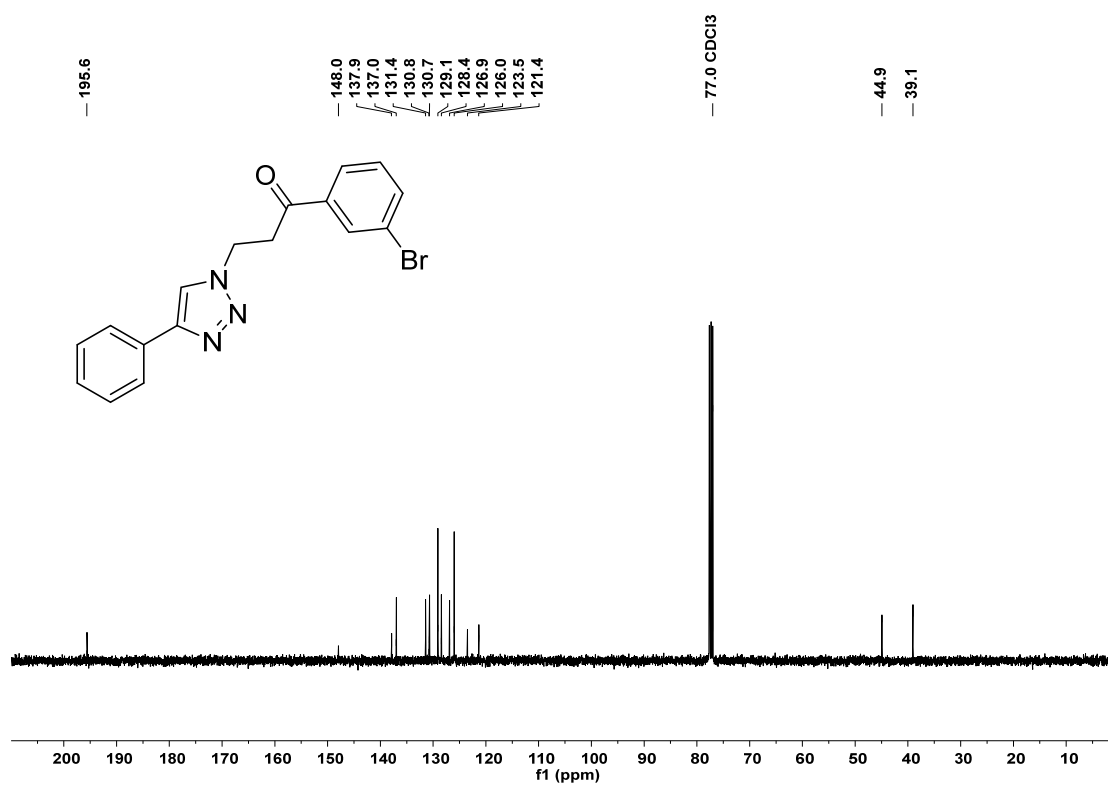



1-(2-chlorophenyl)-3-(4-phenyl-2H-1,2,3-triazol-2-yl)propan-1-one (**3g**)

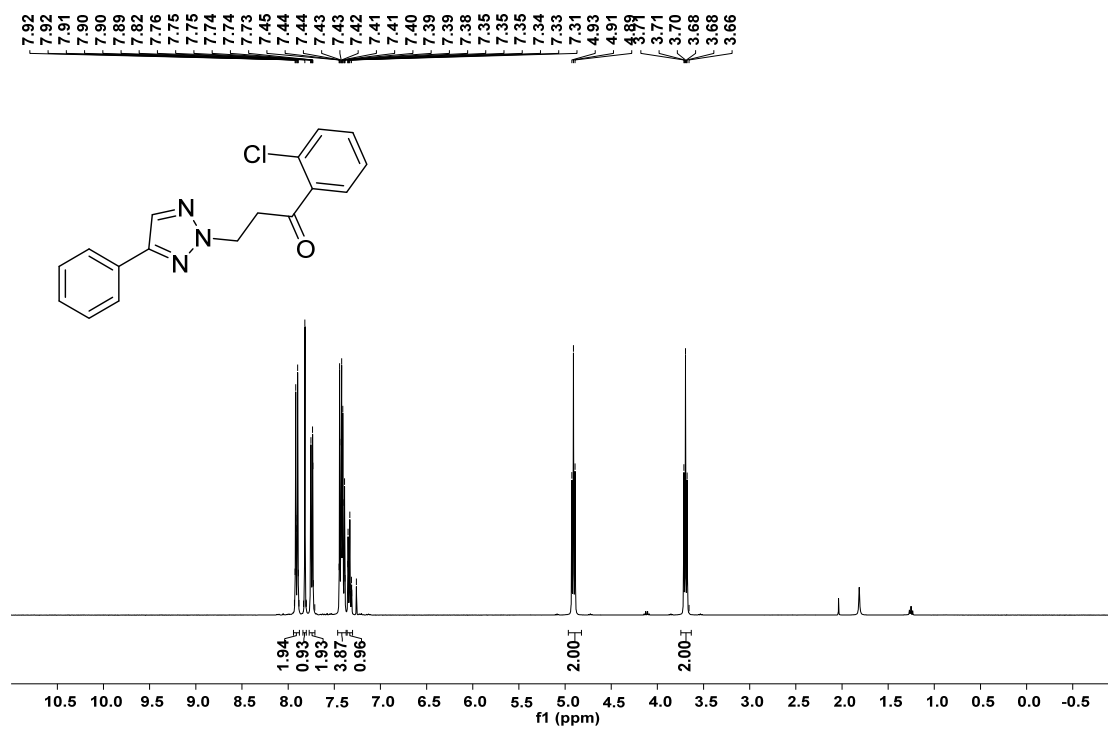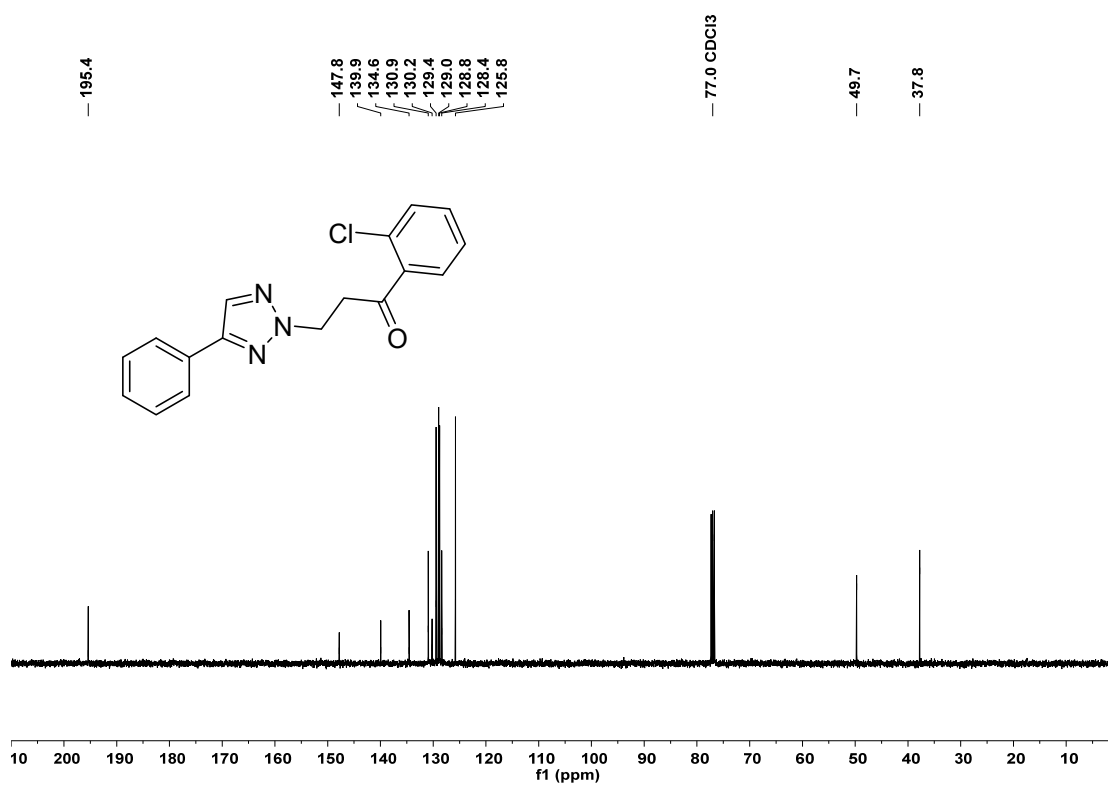

1-(2-chlorophenyl)-3-(4-phenyl-1H-1,2,3-triazol-1-yl)propan-1-one (**3'g**)

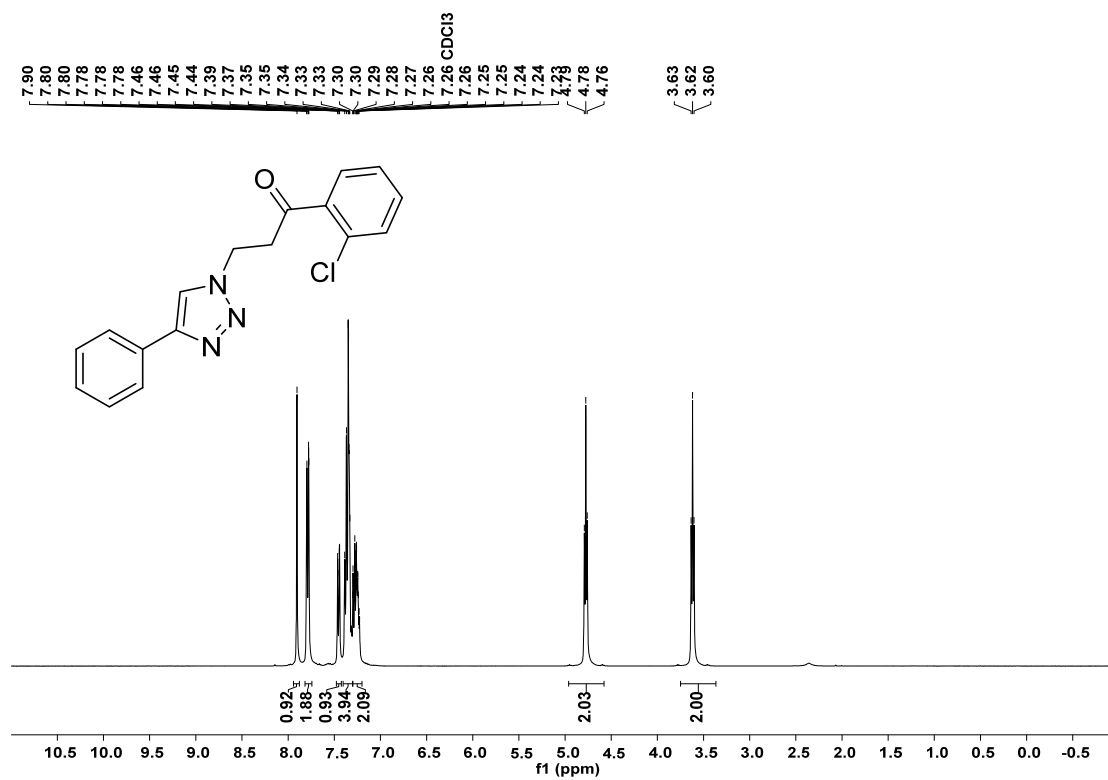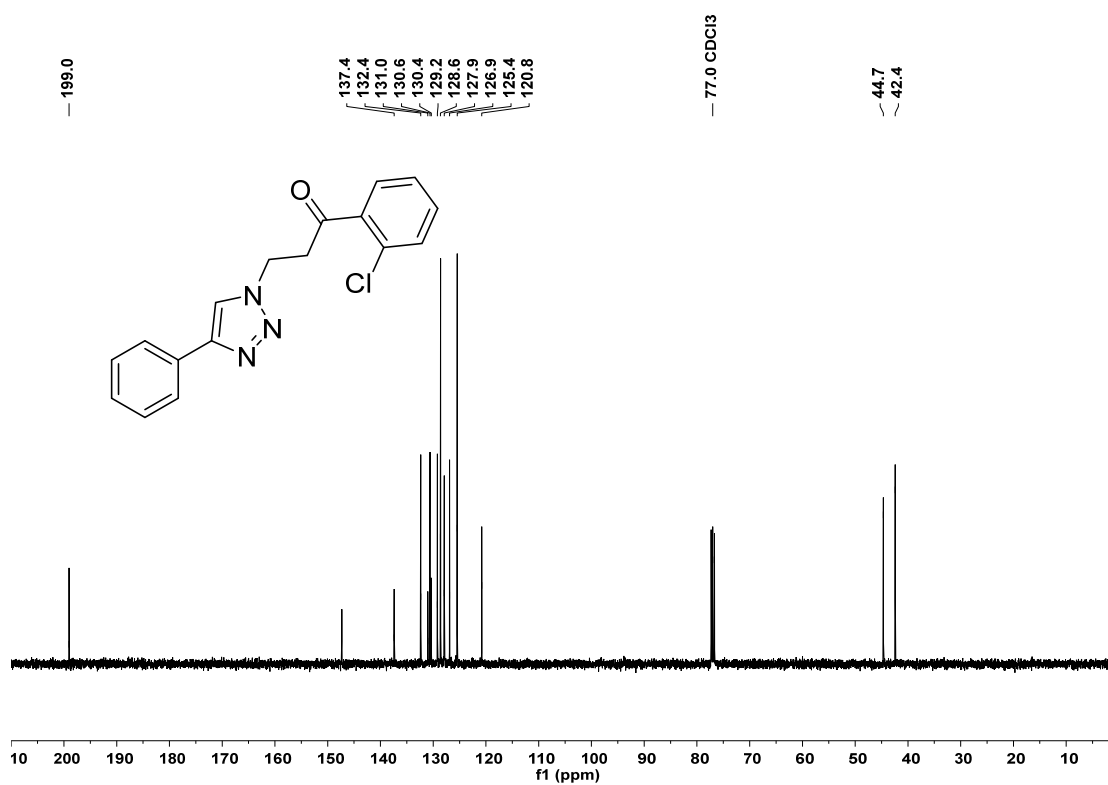

1-(4-bromophenyl)-3-(4-(2-chlorophenyl)-2H-1,2,3-triazol-2-yl)propan-1-one (**3h**)

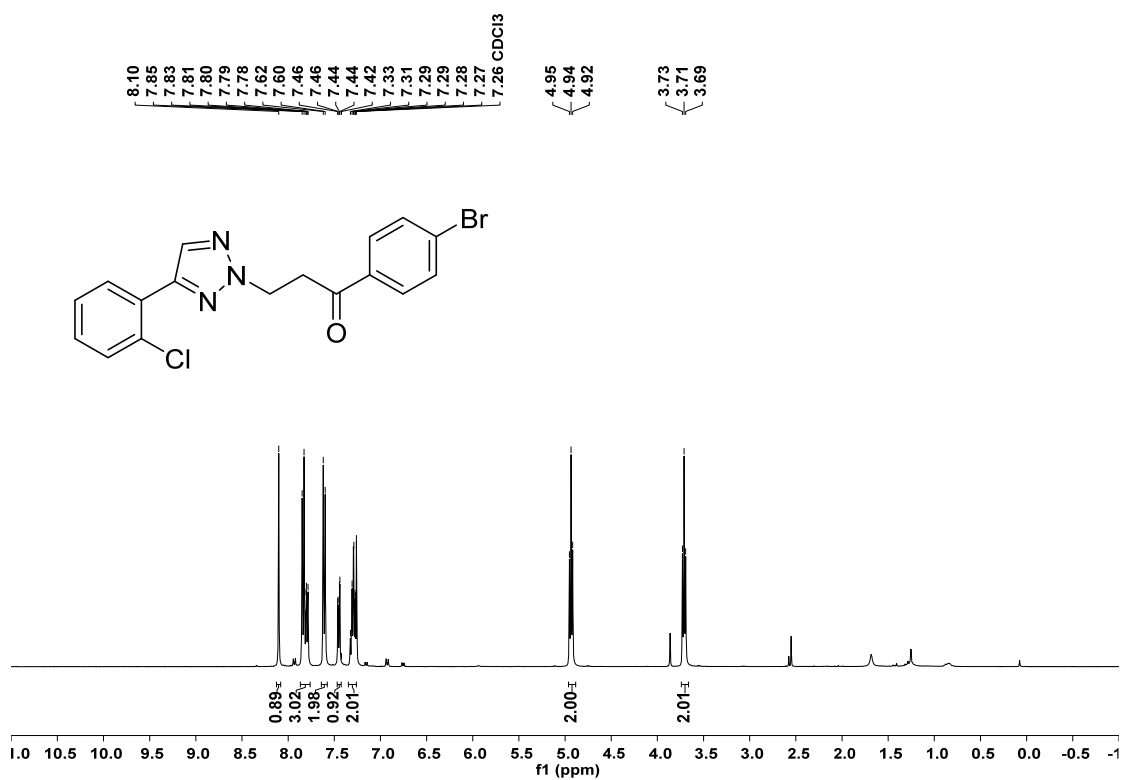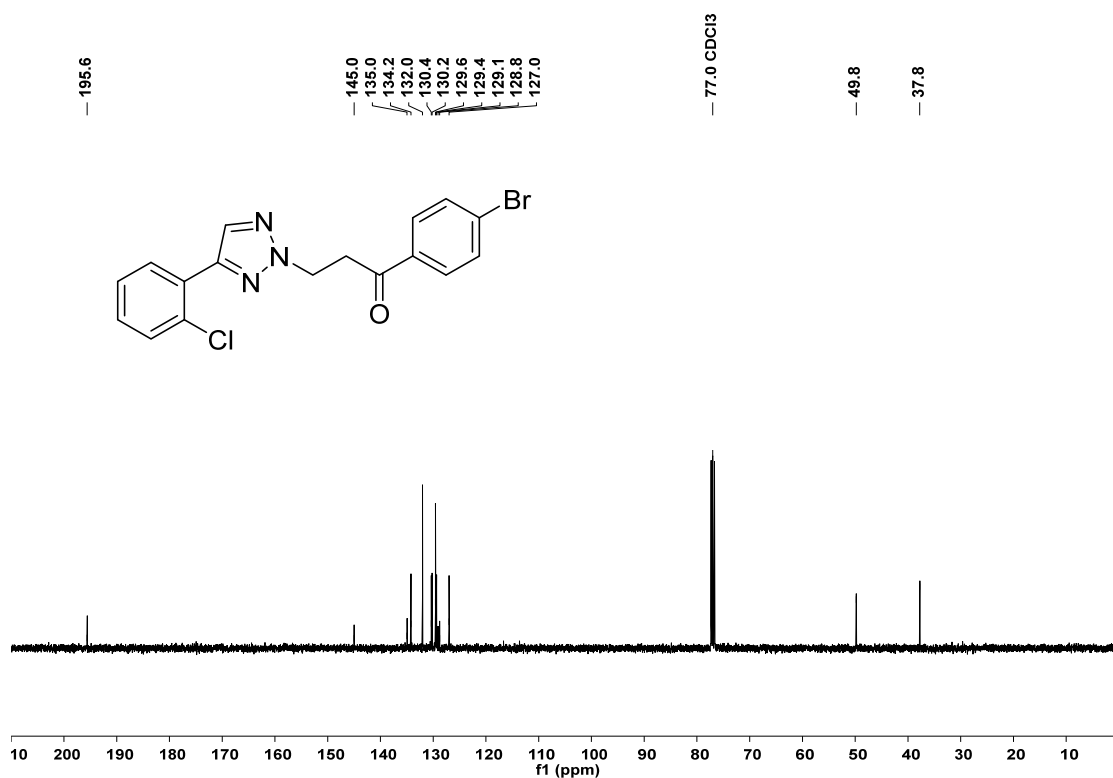

1-(4-bromophenyl)-3-(4-(2-chlorophenyl)-1H-1,2,3-triazol-1-yl)propan-1-one (**3'h**)

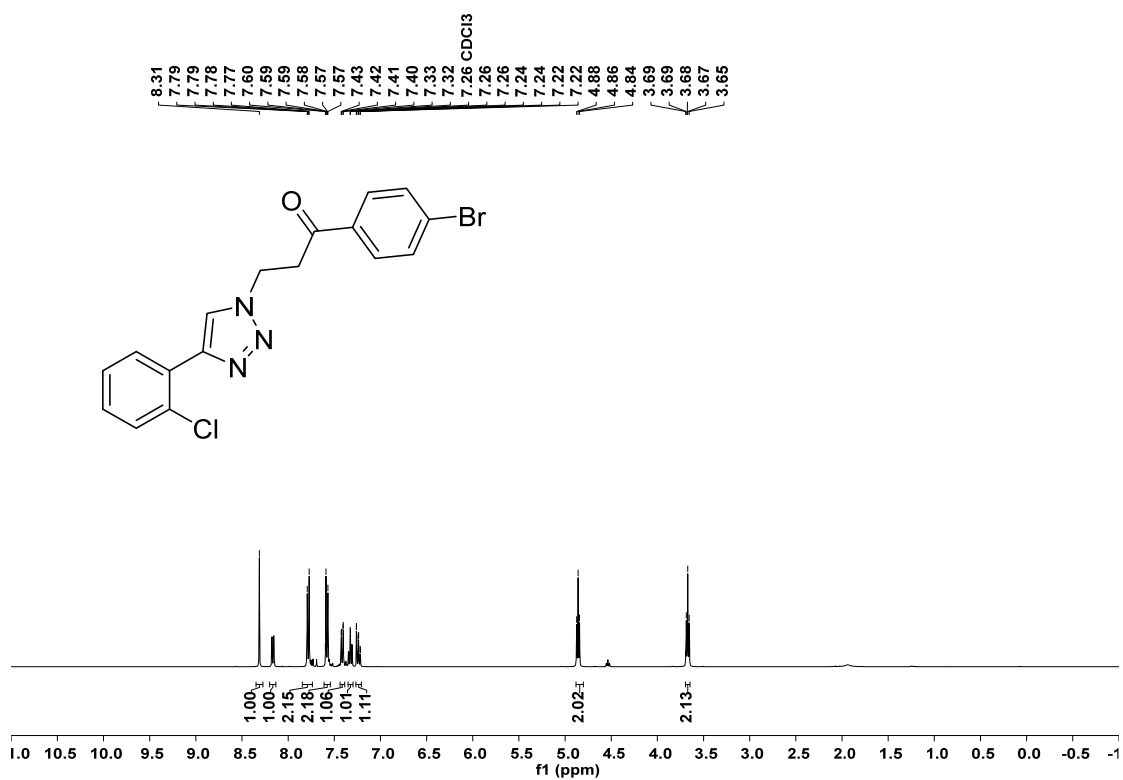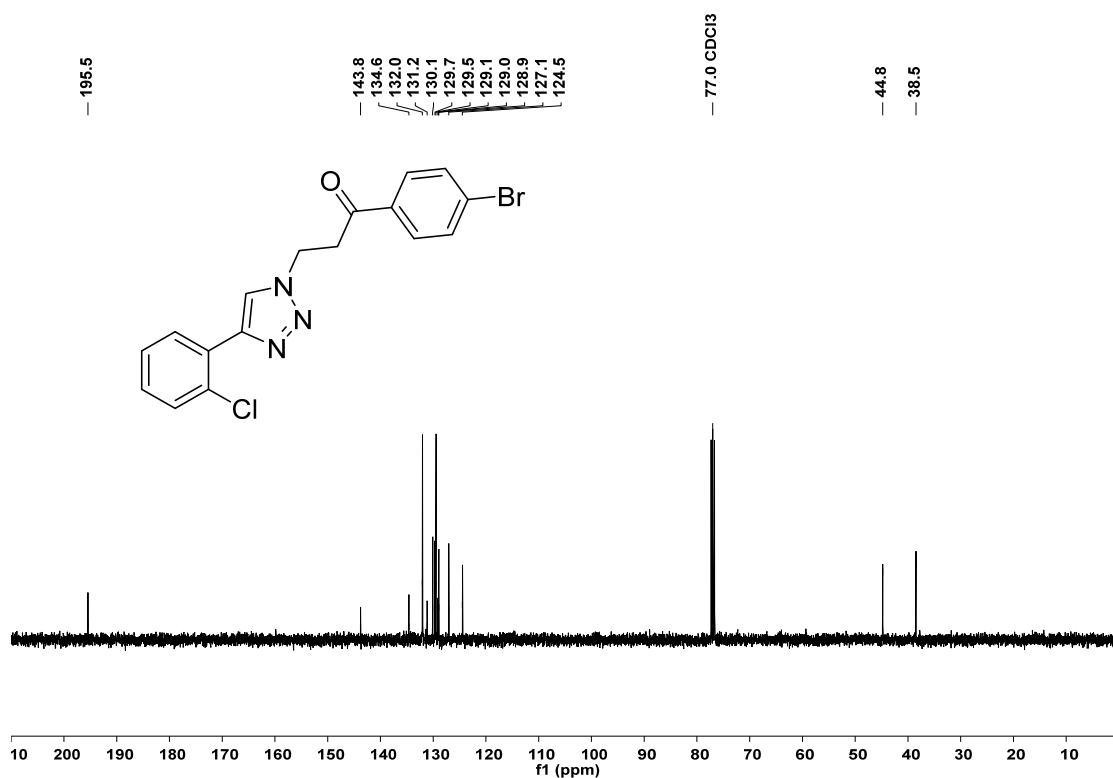

3-(4-(2-chlorophenyl)-2H-1,2,3-triazol-2-yl)-1-(4-methoxyphenyl)propan-1-one (**3i**)

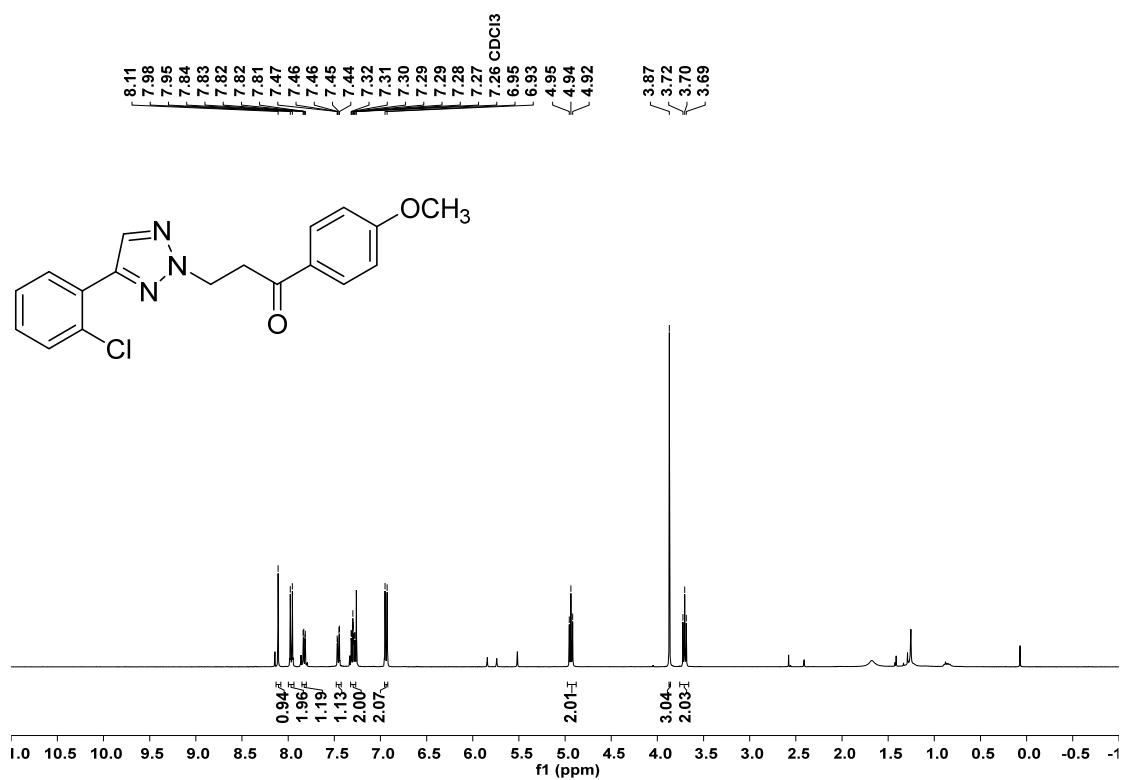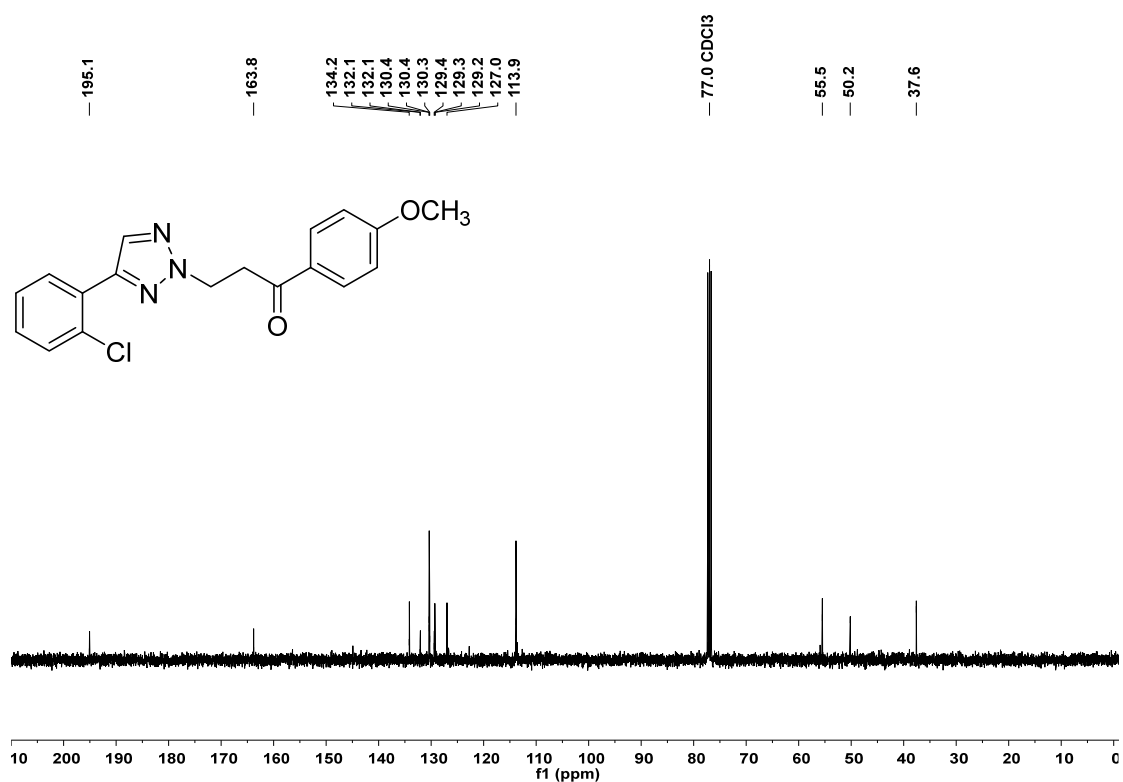

3-(4-(2-chlorophenyl)-1H-1,2,3-triazol-1-yl)-1-(4-methoxyphenyl)propan-1-one (**3'i**)

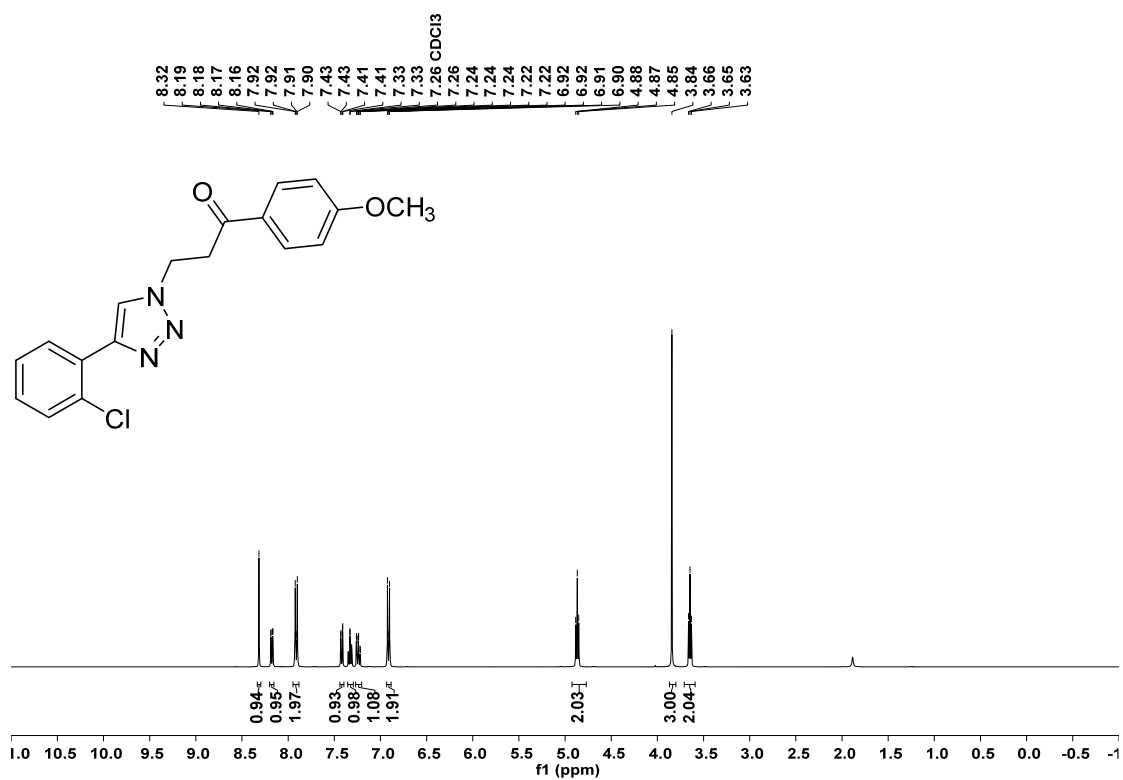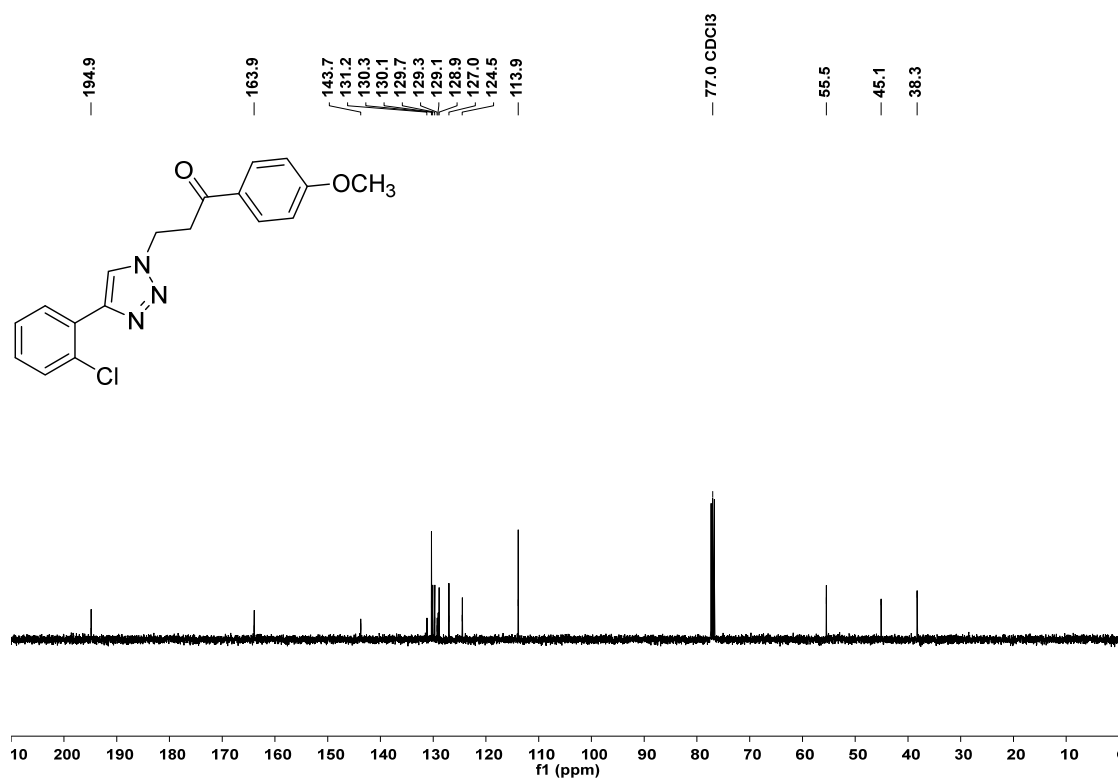

1-(naphthalen-2-yl)-3-(4-phenyl-2H-1,2,3-triazol-2-yl)propan-1-one (**3j**)

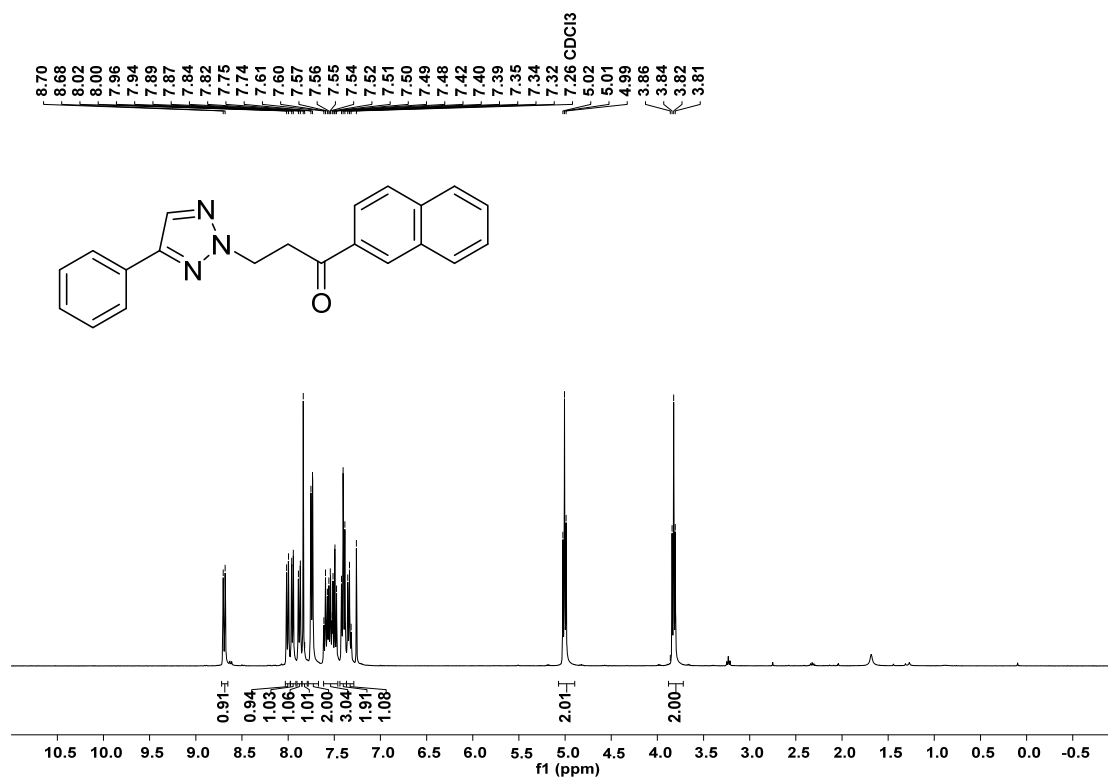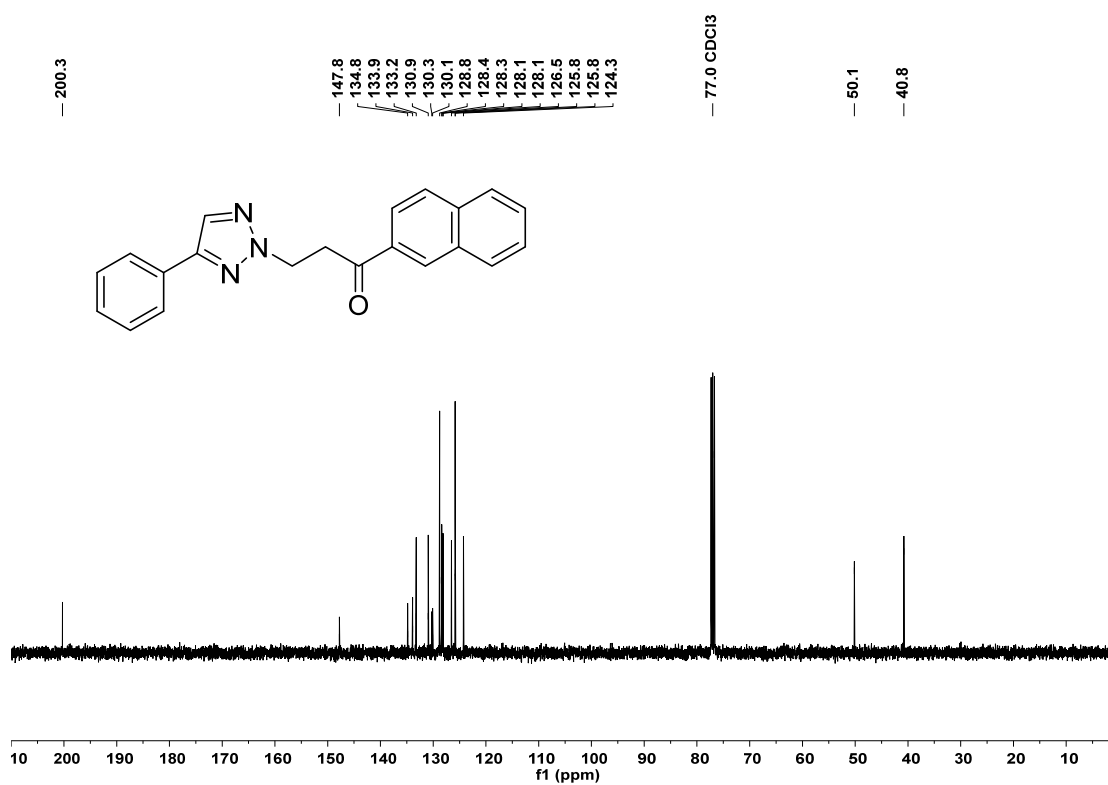

1-(naphthalen-2-yl)-3-(4-phenyl-1H-1,2,3-triazol-1-yl)propan-1-one (**3'j**)

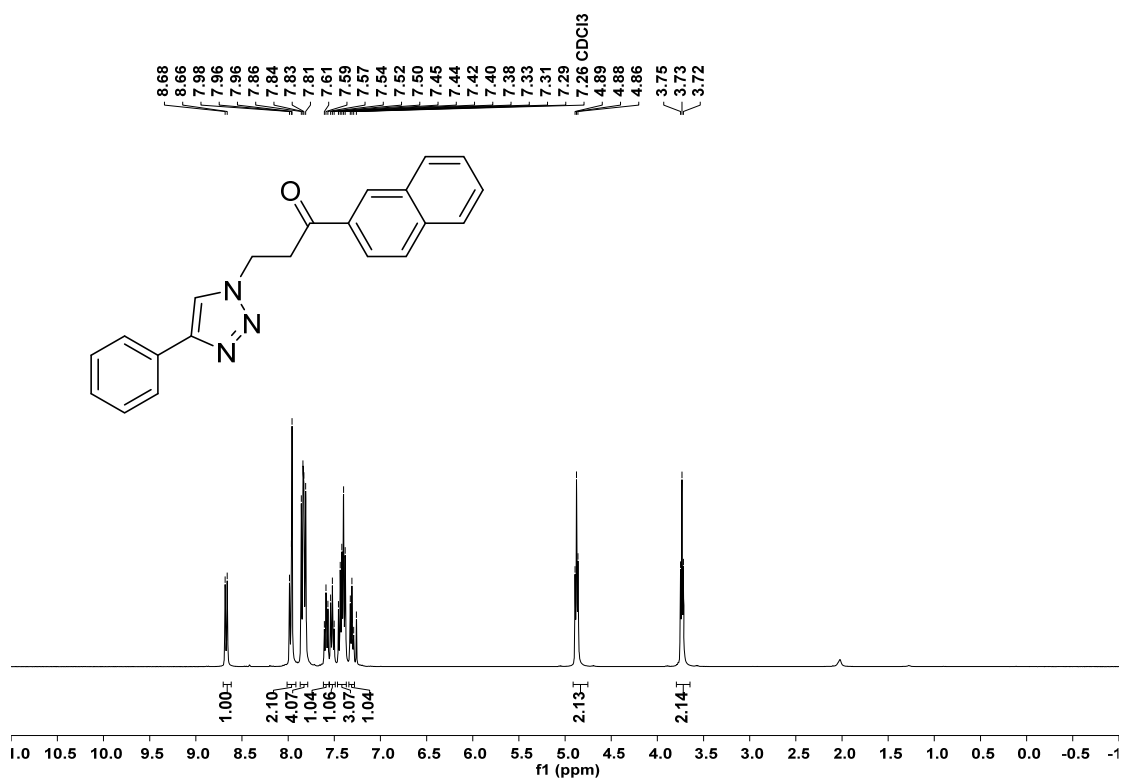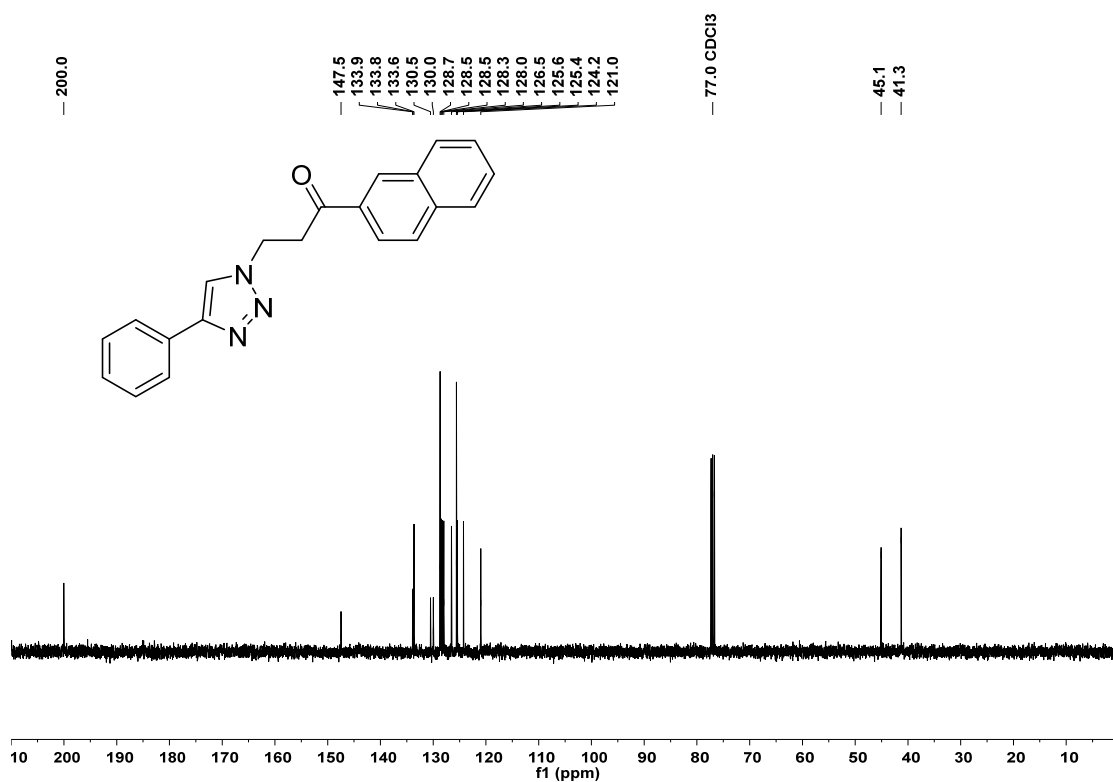



2-methyl-1-phenyl-3-(4-phenyl-2H-1,2,3-triazol-2-yl)propan-1-one (**3k**)

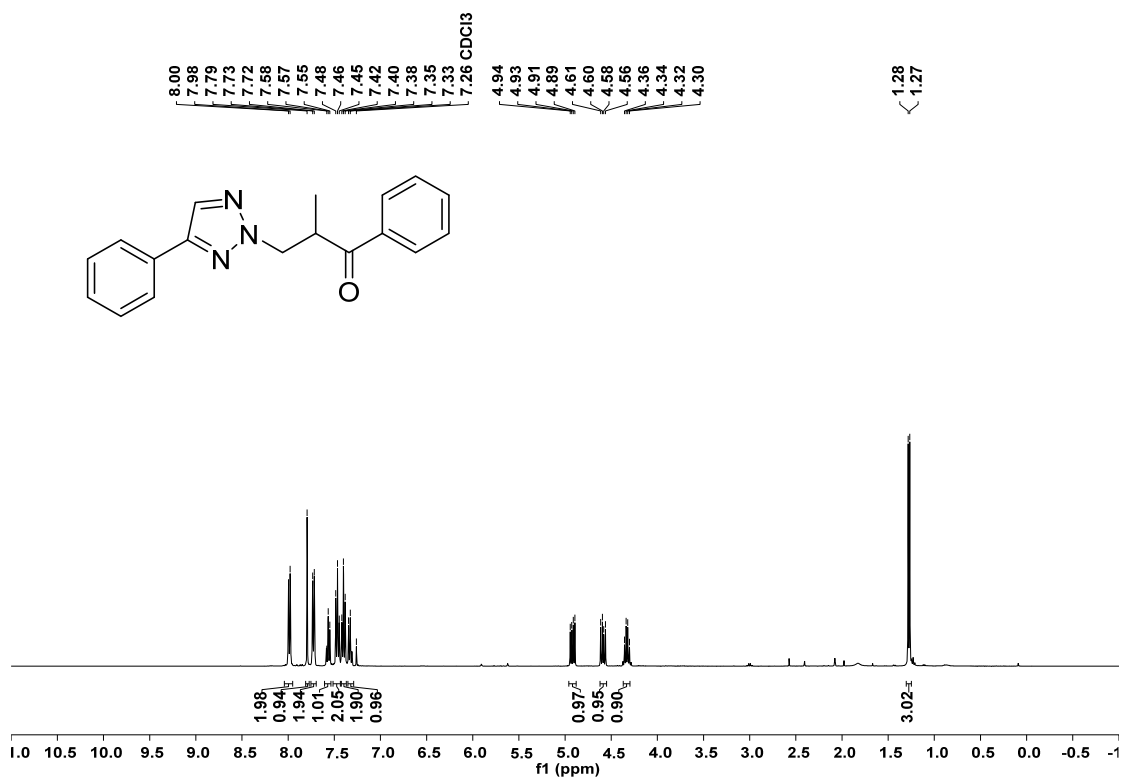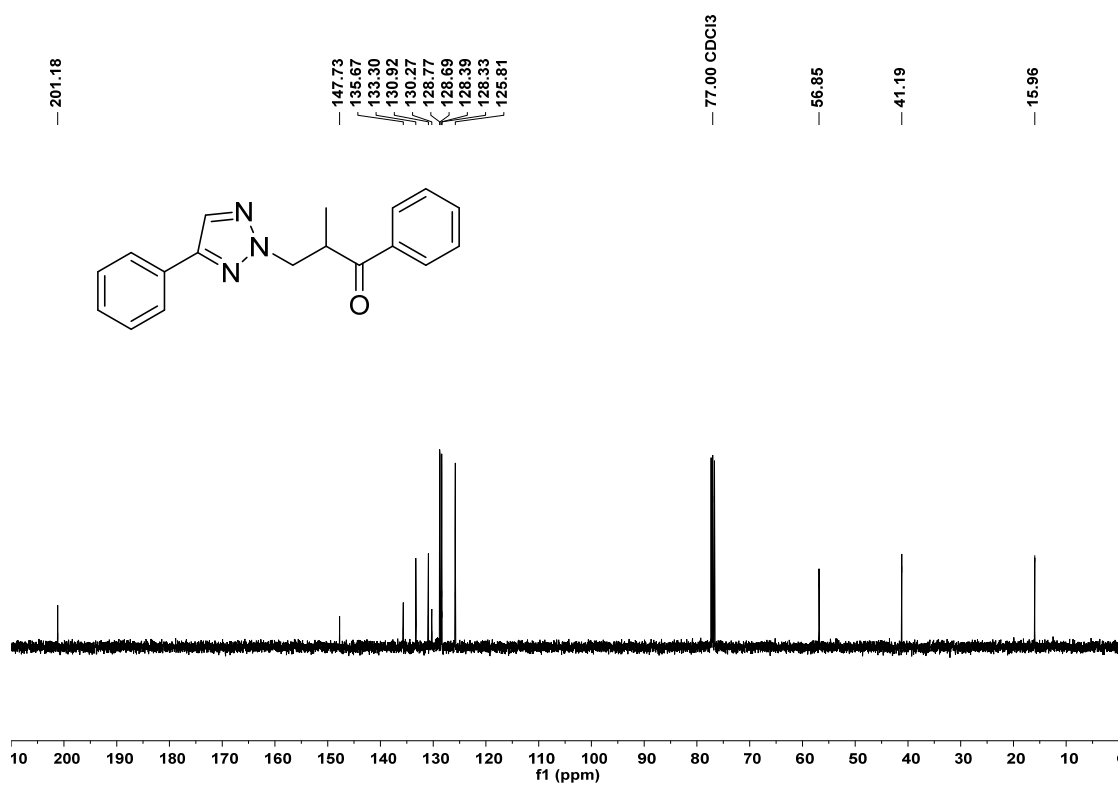

2-methyl-1-phenyl-3-(4-phenyl-1*H*-1,2,3-triazol-1-yl)propan-1-one (**3'k**)

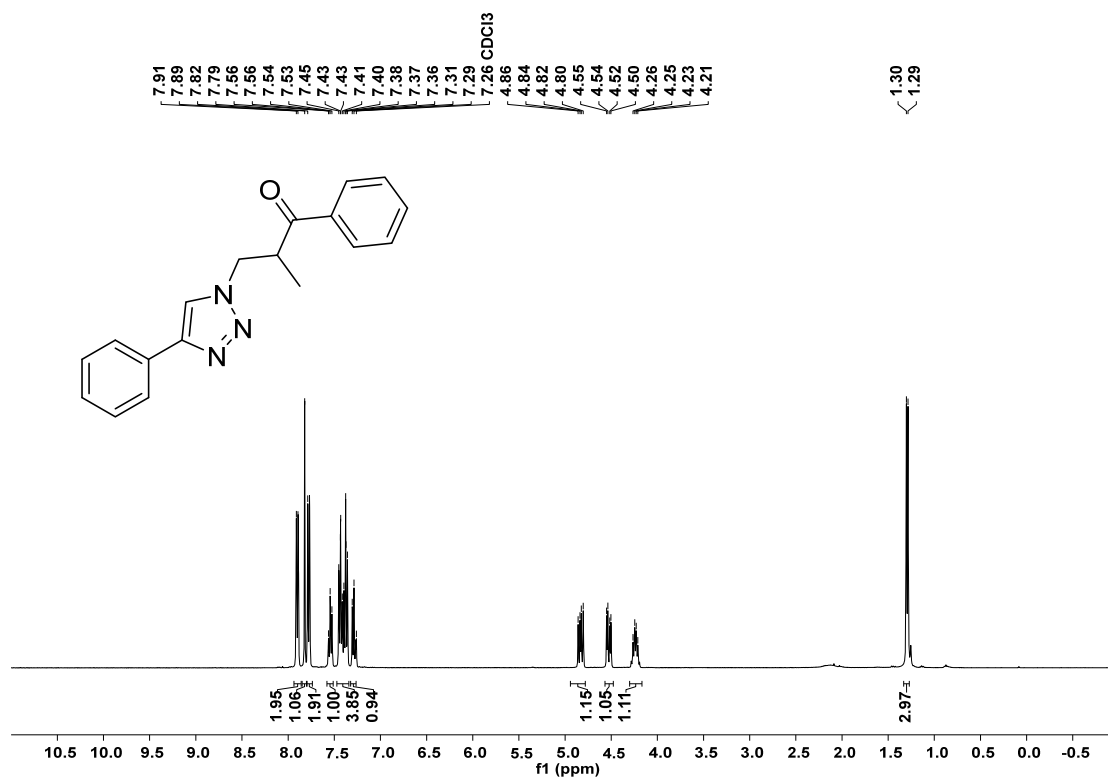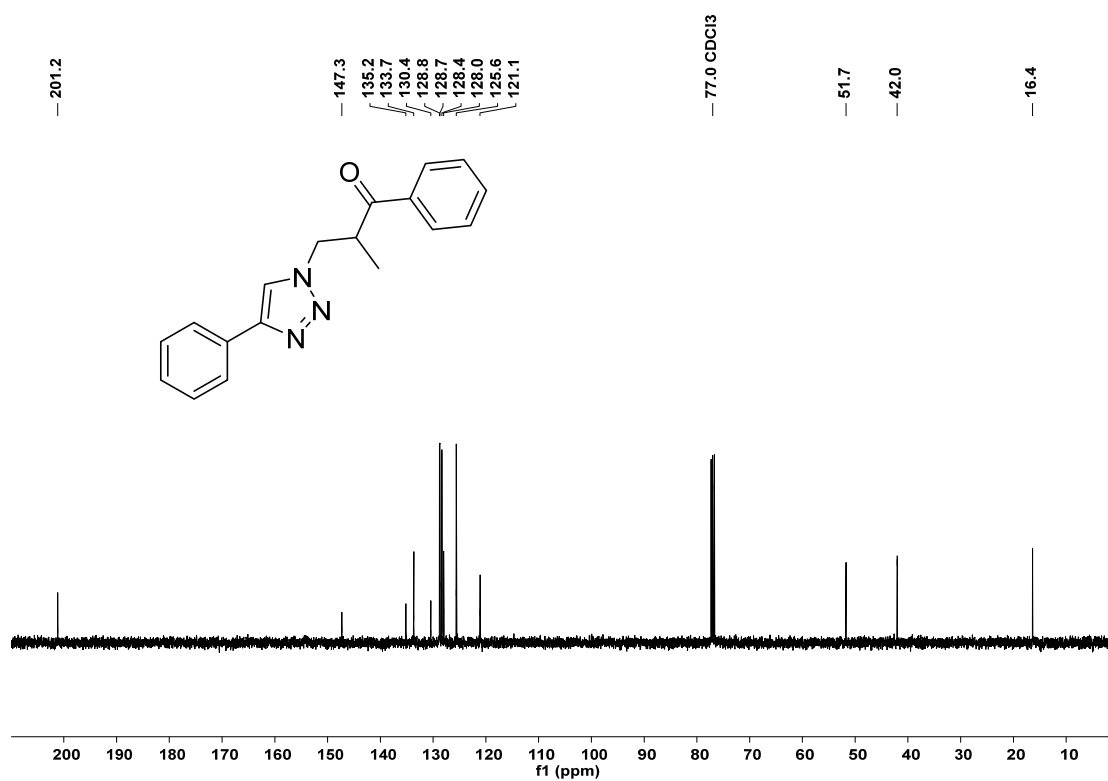

3-(4-methyl-5-phenyl-2H-1,2,3-triazol-2-yl)-1-phenylpropan-1-one (**31**)

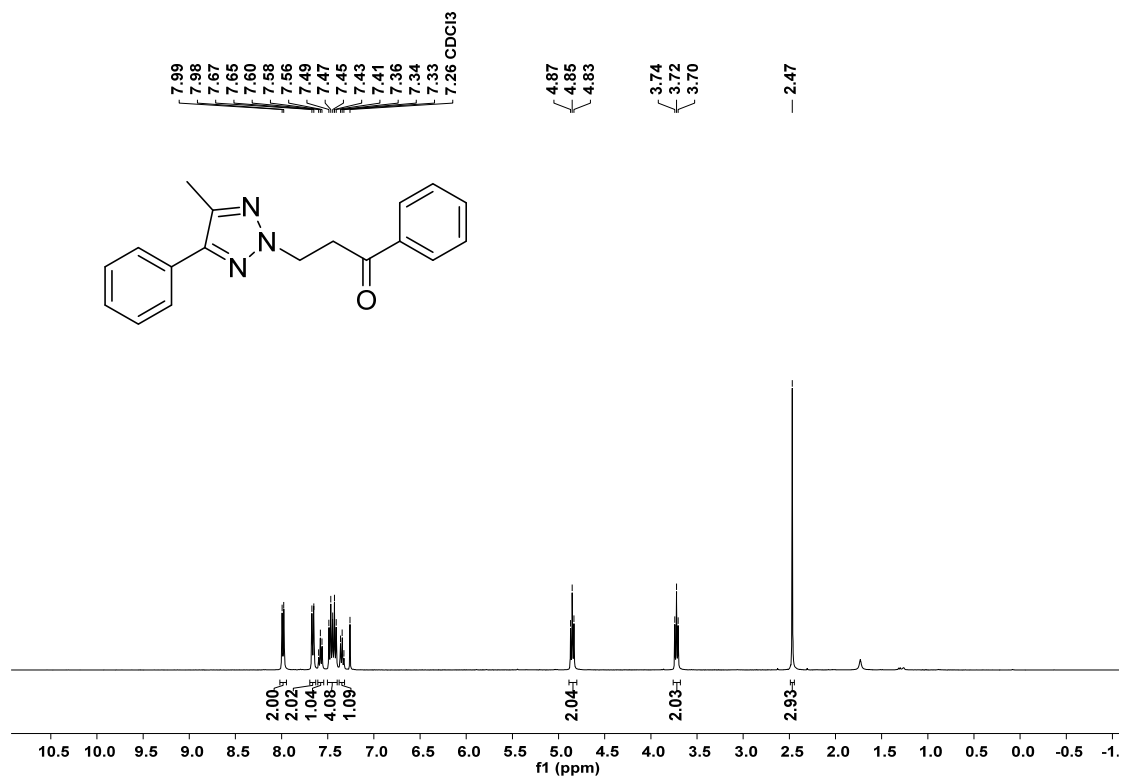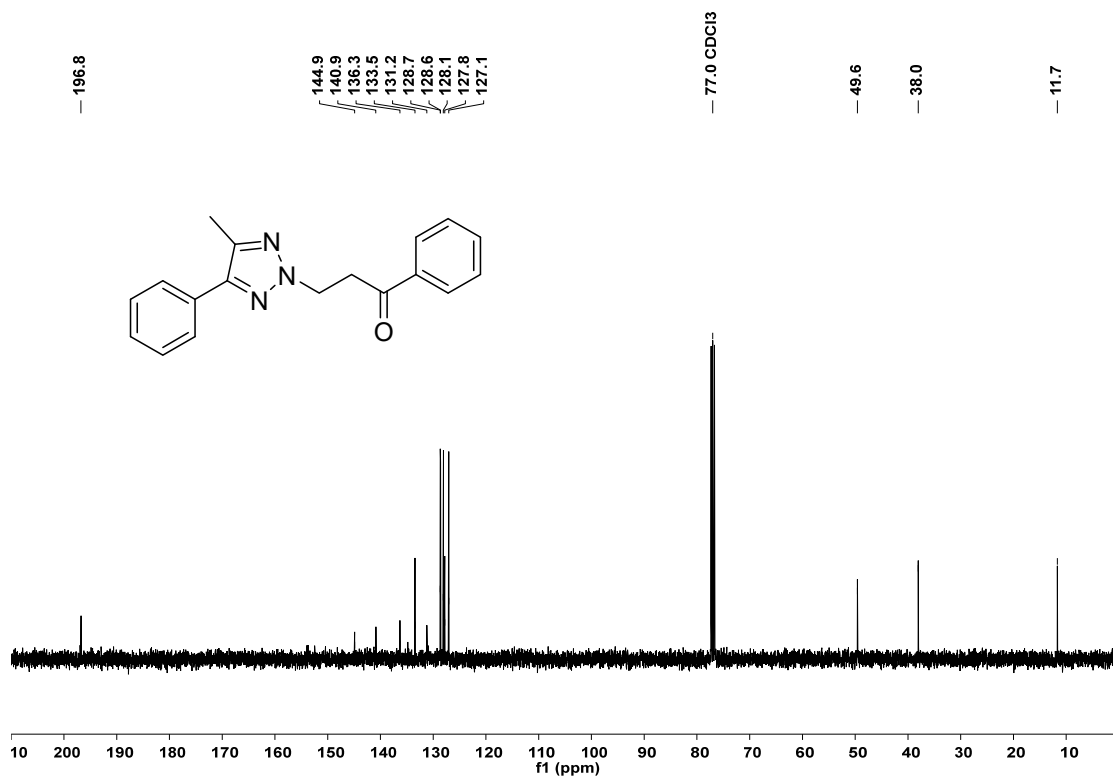

3-(5-methyl-4-phenyl-1H-1,2,3-triazol-1-yl)-1-phenylpropan-1-one (**3'1**)

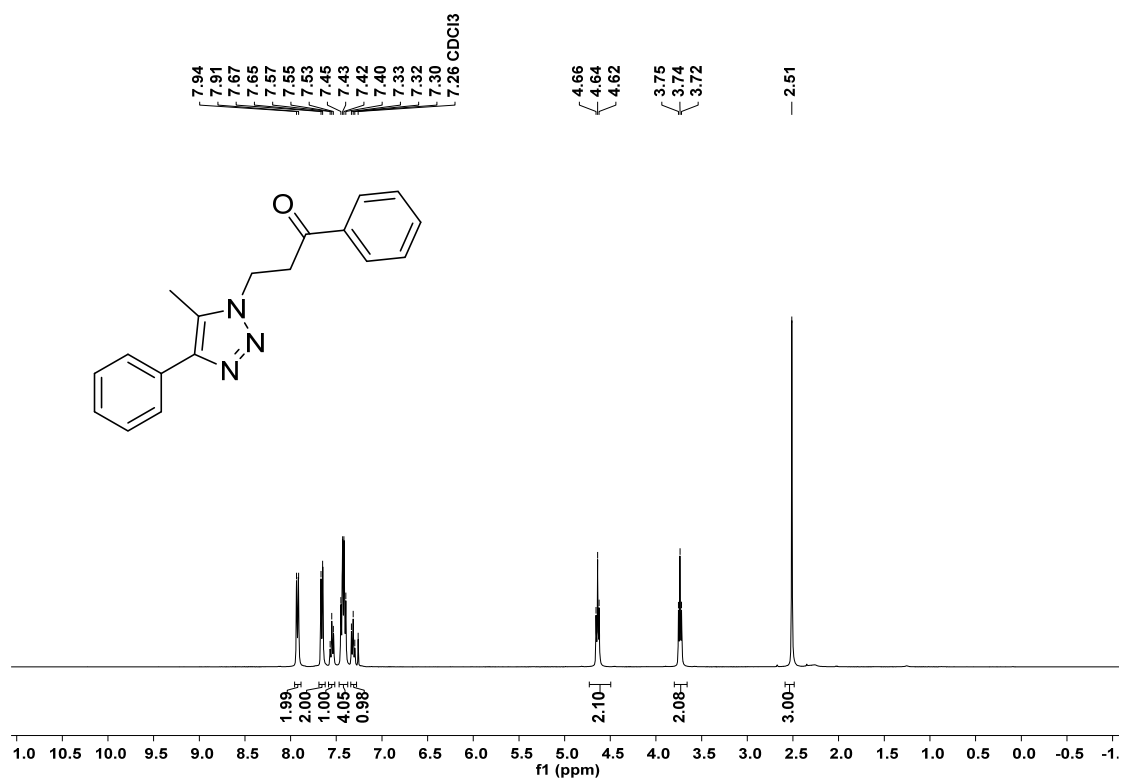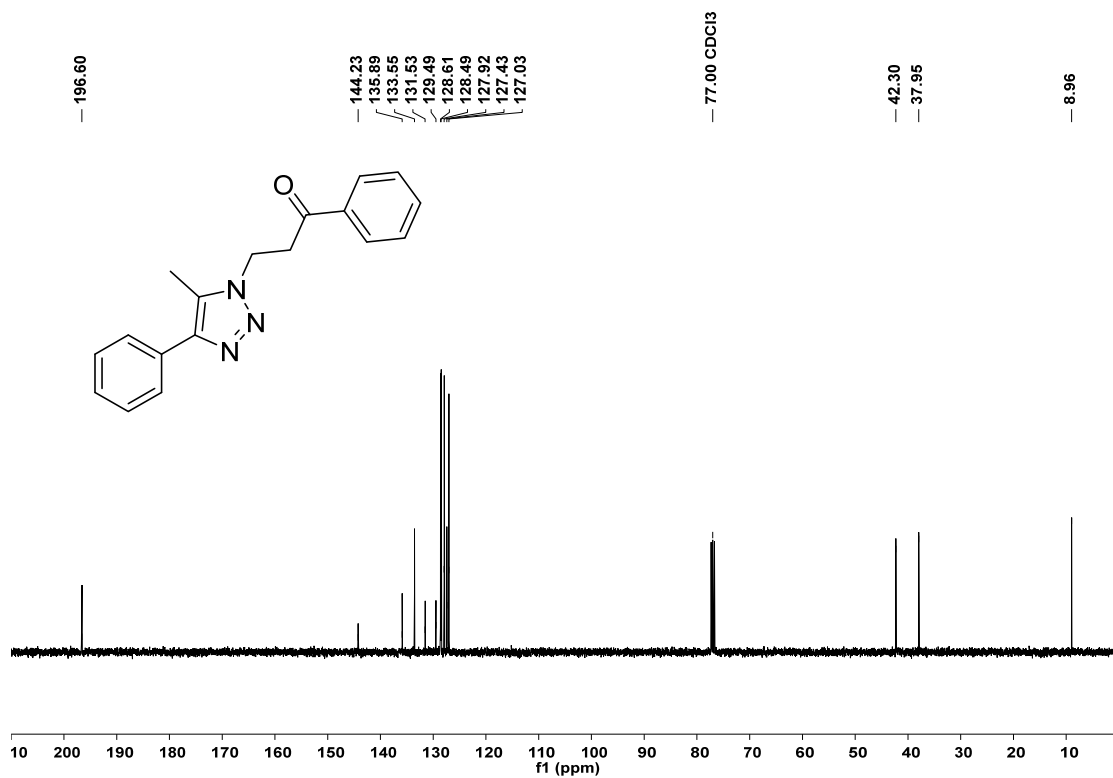

1-(4-methoxyphenyl)-3-(4-methyl-5-phenyl-2H-1,2,3-triazol-2-yl)propan-1-one (**3m**)

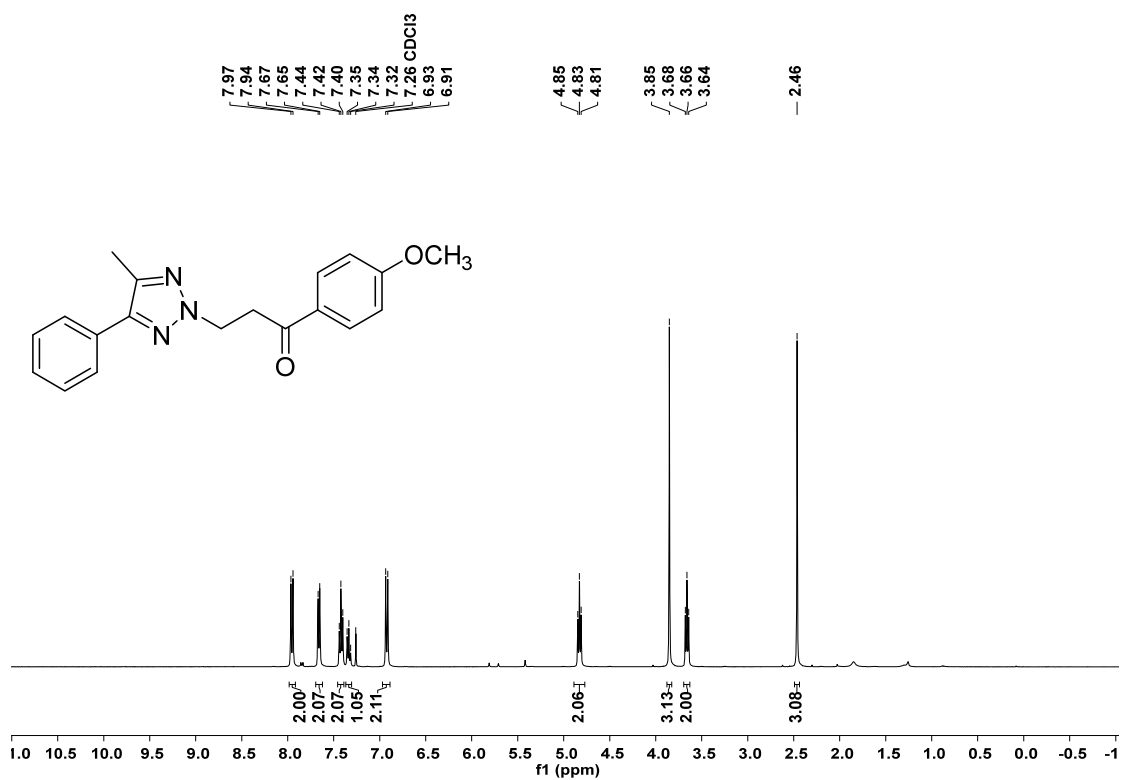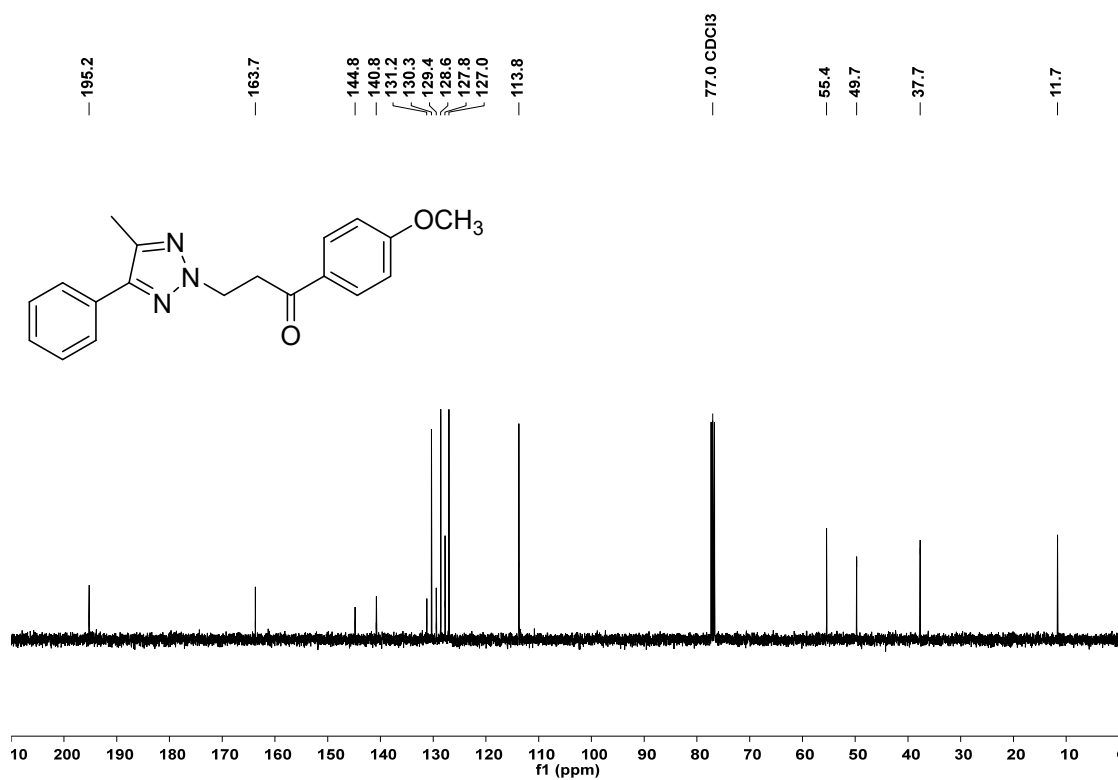

1-(4-methoxyphenyl)-3-(5-methyl-4-phenyl-1H-1,2,3-triazol-1-yl)propan-1-one (**3'm**)

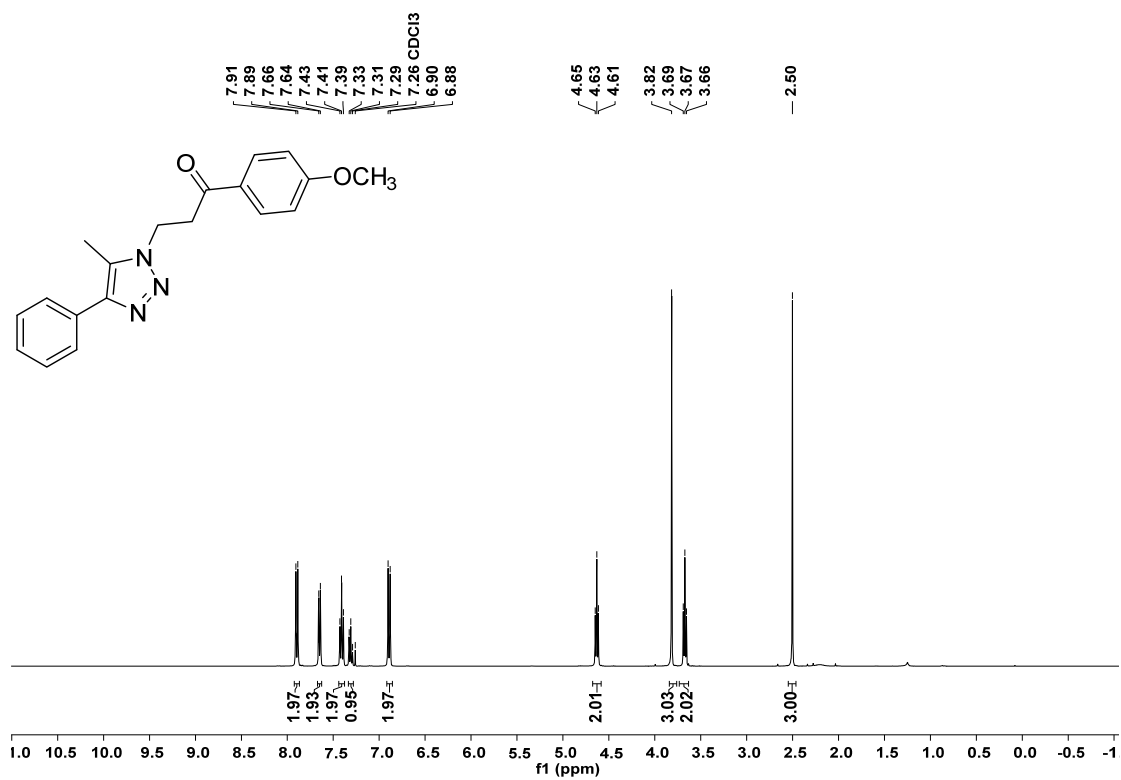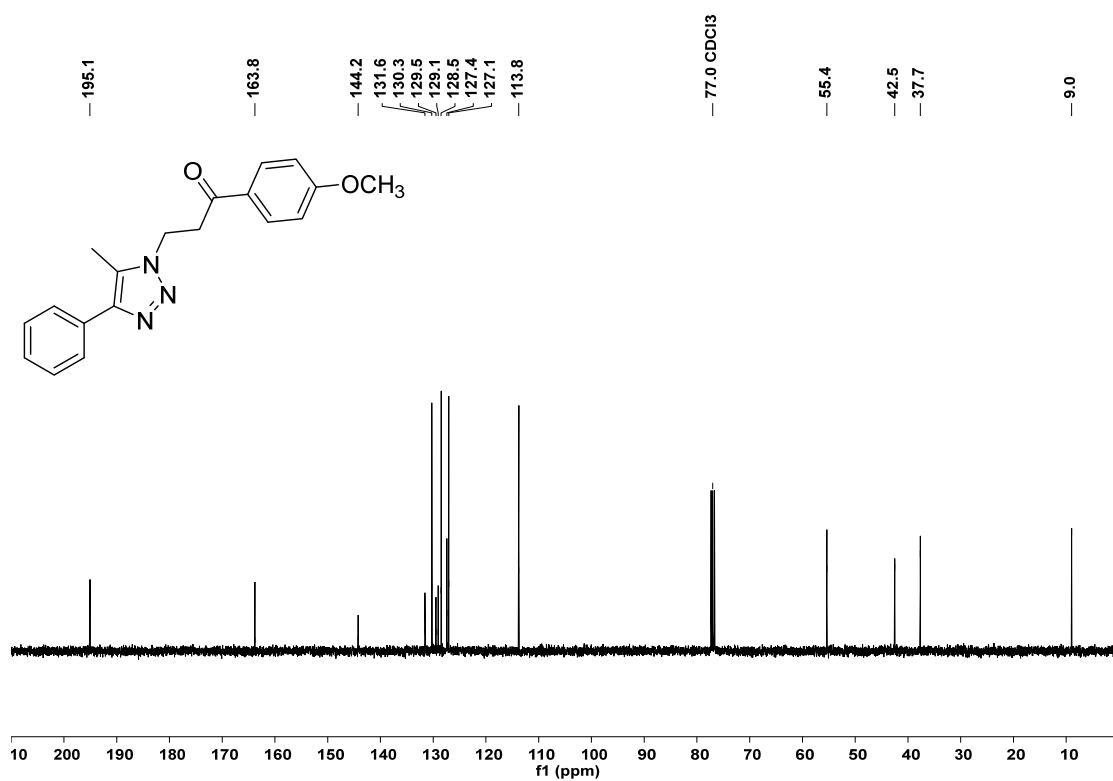

1-(4-bromophenyl)-3-(4-methyl-5-phenyl-2H-1,2,3-triazol-2-yl)propan-1-one (**3n**)

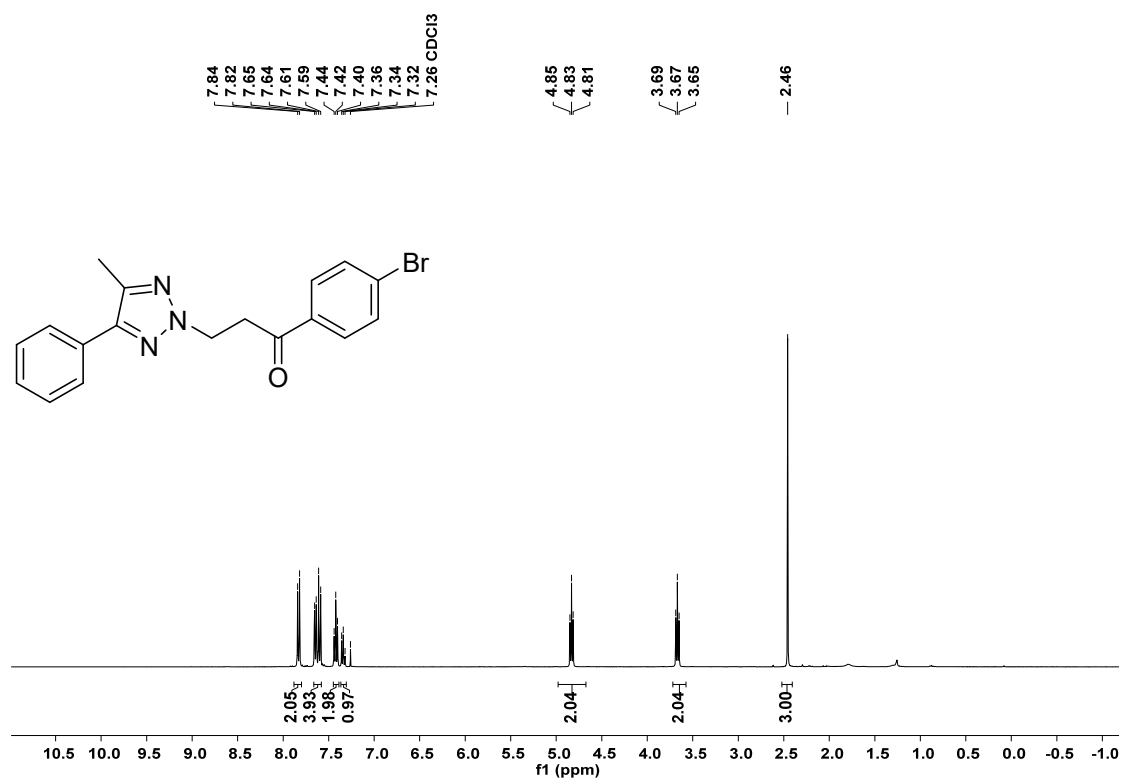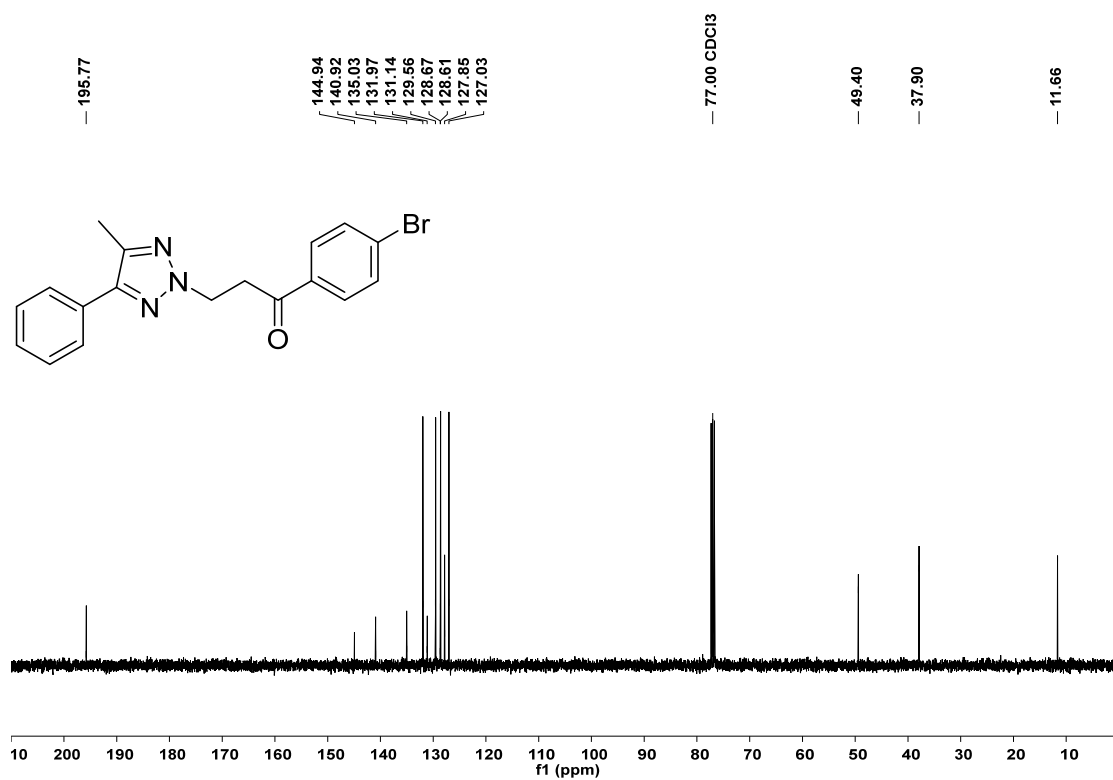

1-(4-bromophenyl)-3-(5-methyl-4-phenyl-1H-1,2,3-triazol-1-yl)propan-1-one (**3'n**)

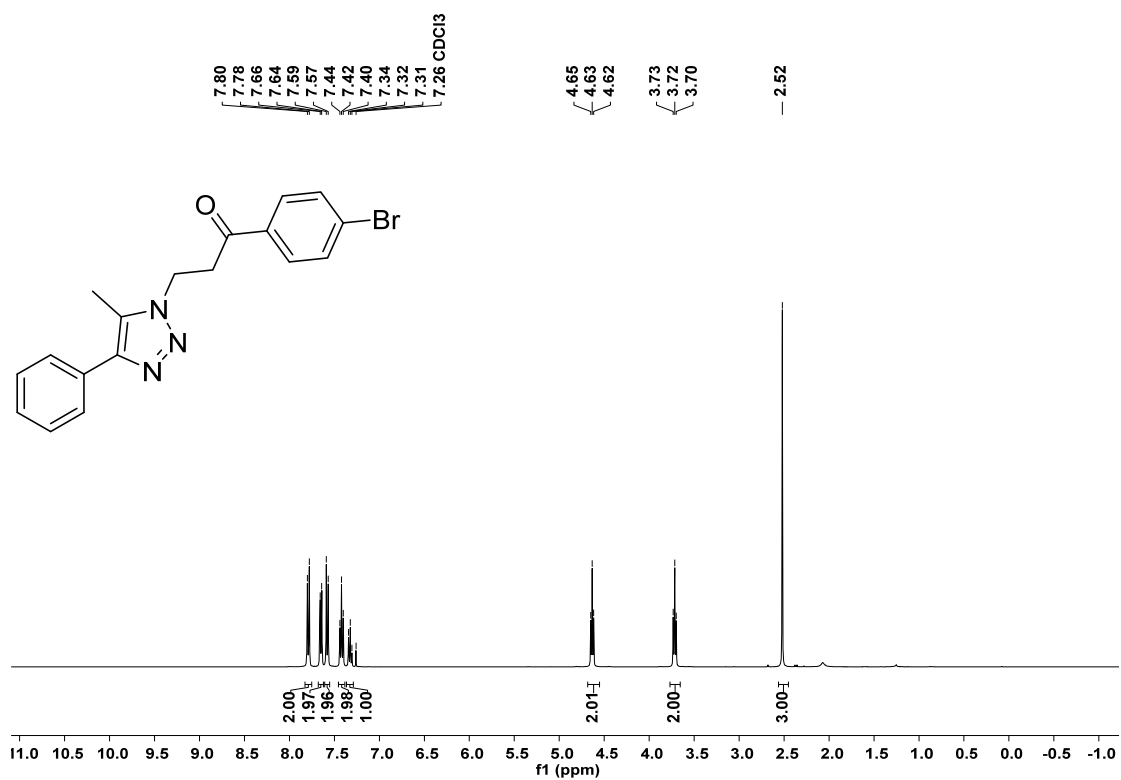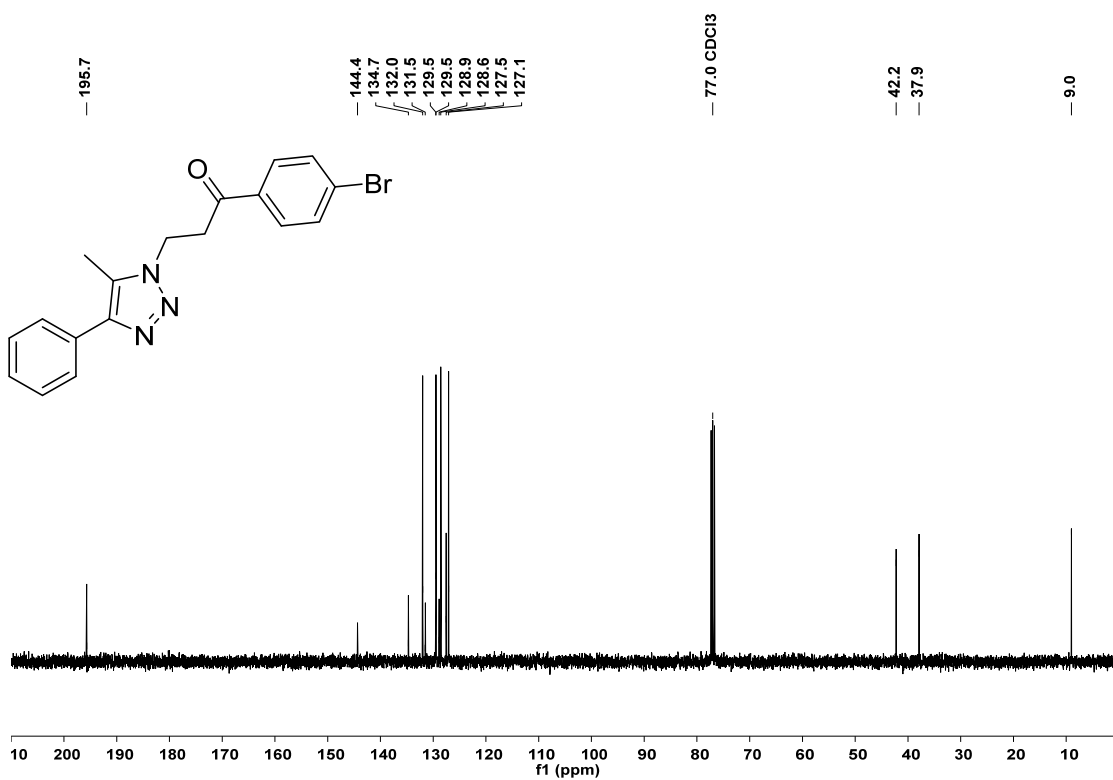



3-(4,5-diphenyl-2H-1,2,3-triazol-2-yl)-1-phenylpropan-1-one (**30**)

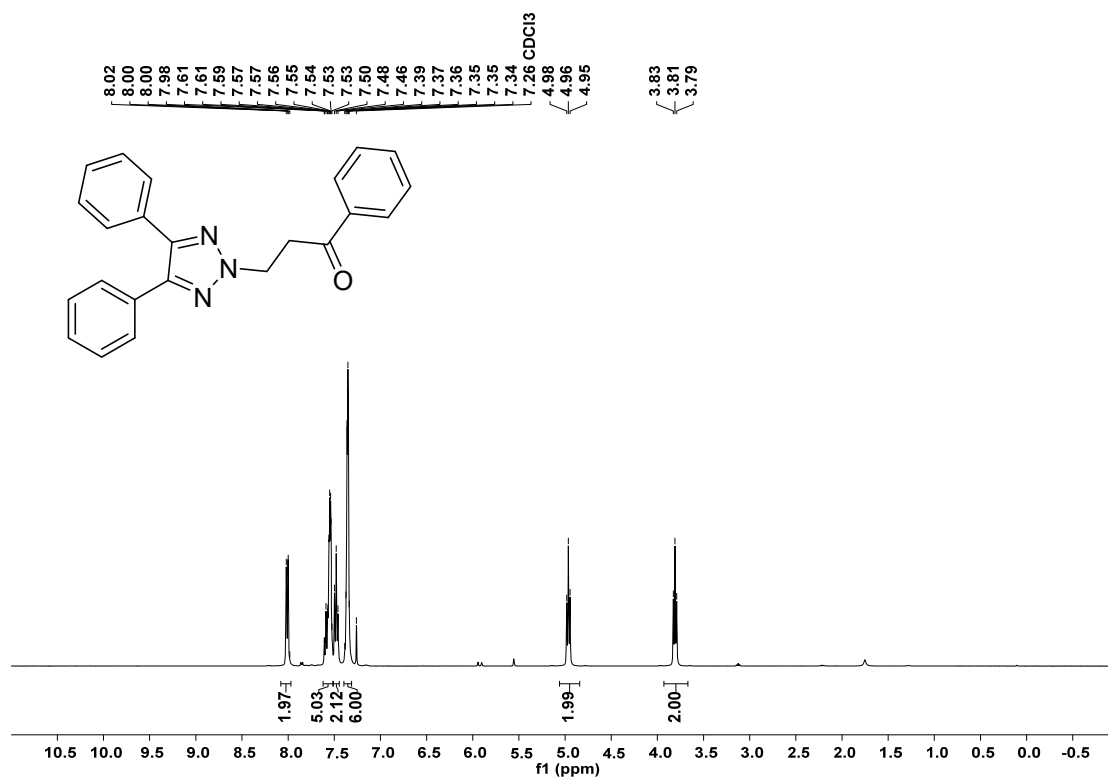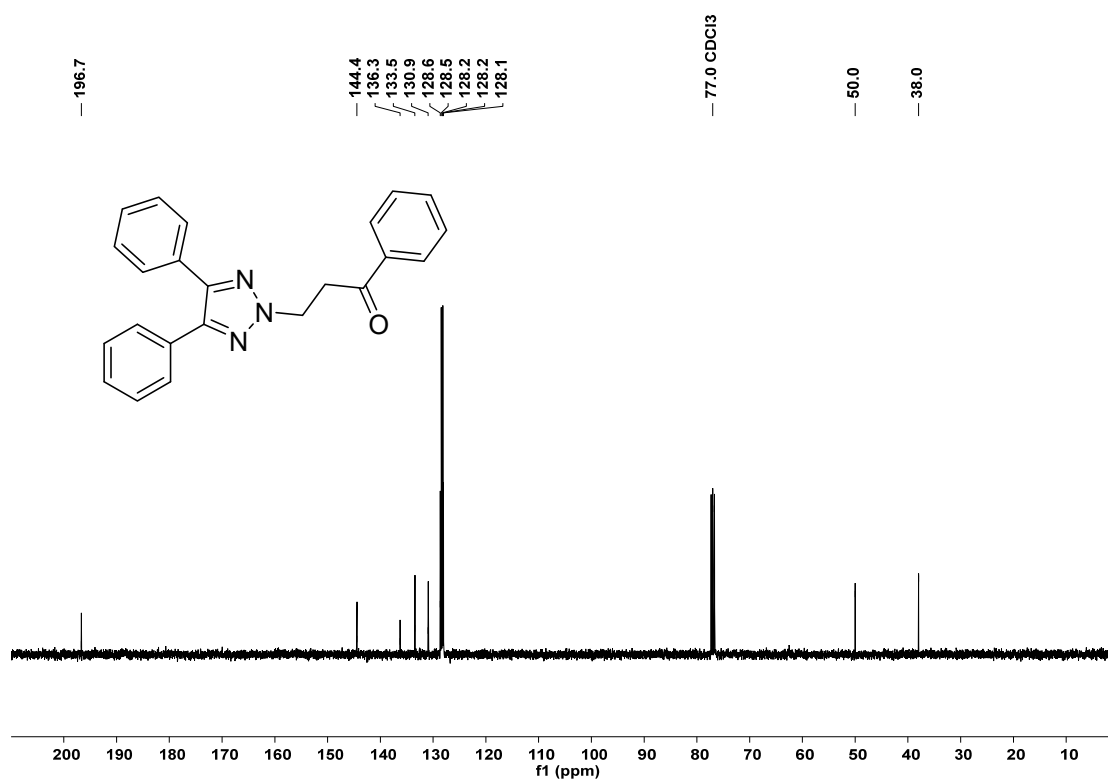

3-(4,5-diphenyl-1H-1,2,3-triazol-1-yl)-1-phenylpropan-1-one (**3'o**)

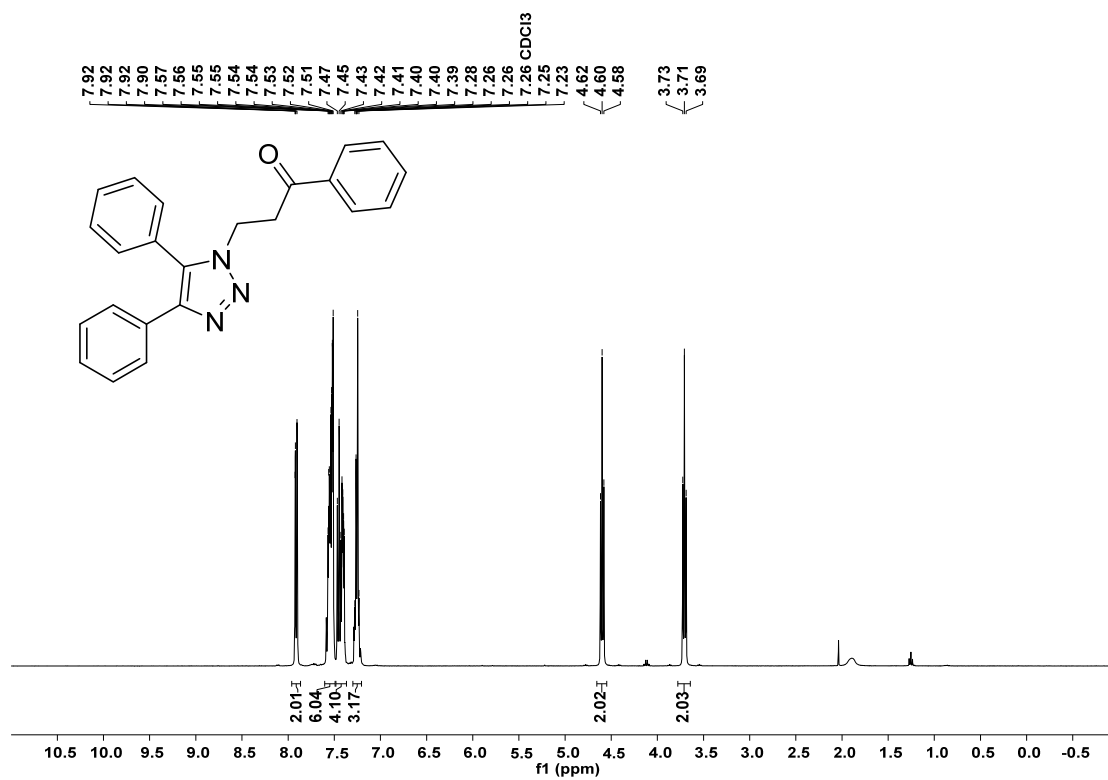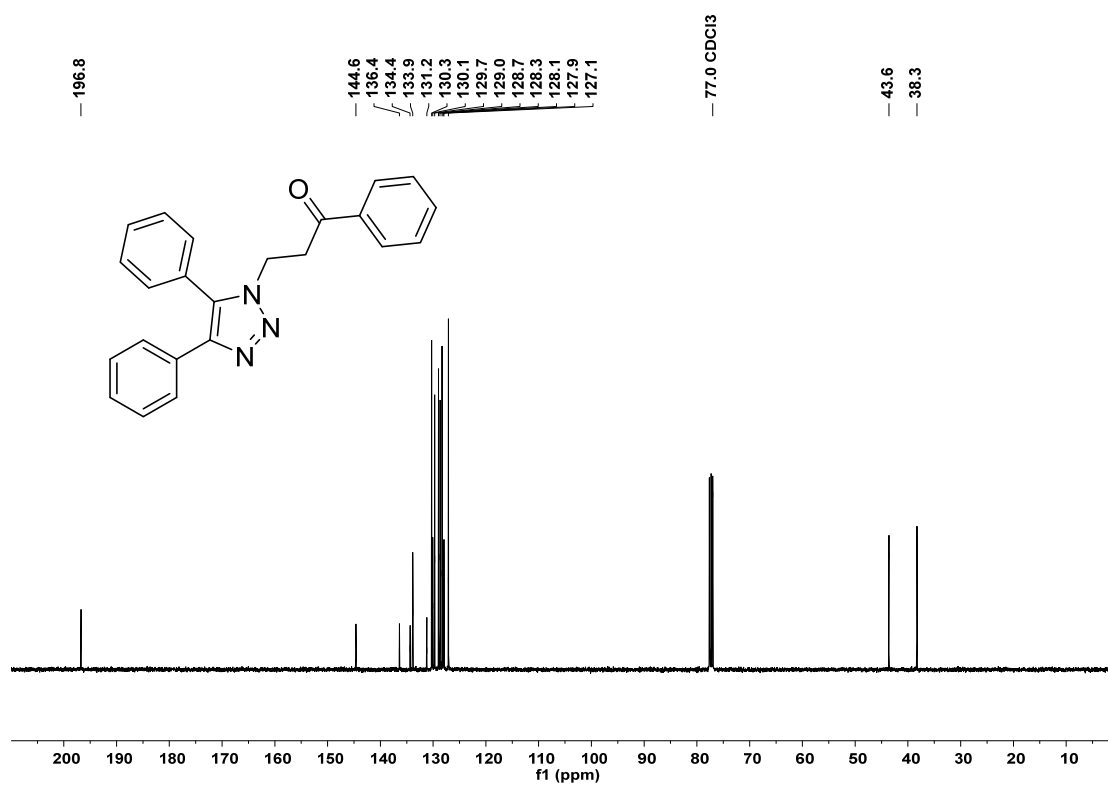

1-(2-chlorophenyl)-3-(4,5-diphenyl-2H-1,2,3-triazol-2-yl)propan-1-one (**3p**)

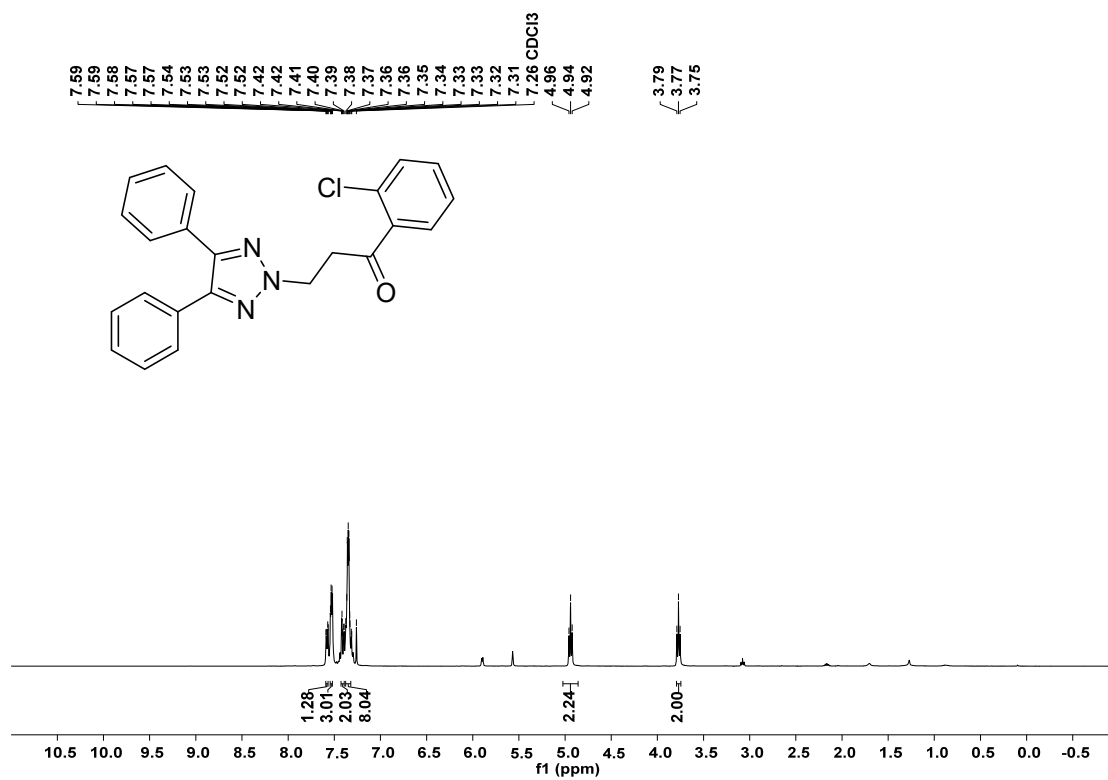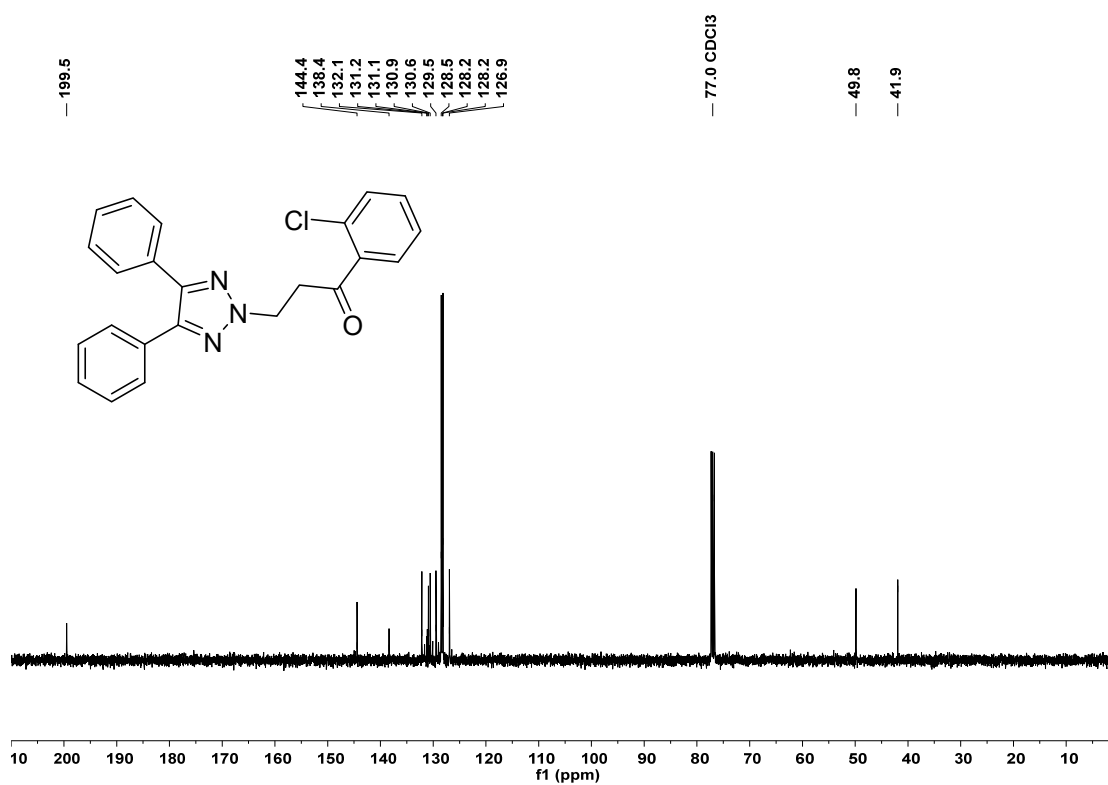

1-(2-chlorophenyl)-3-(4,5-diphenyl-1H-1,2,3-triazol-1-yl)propan-1-one (**3'p**)

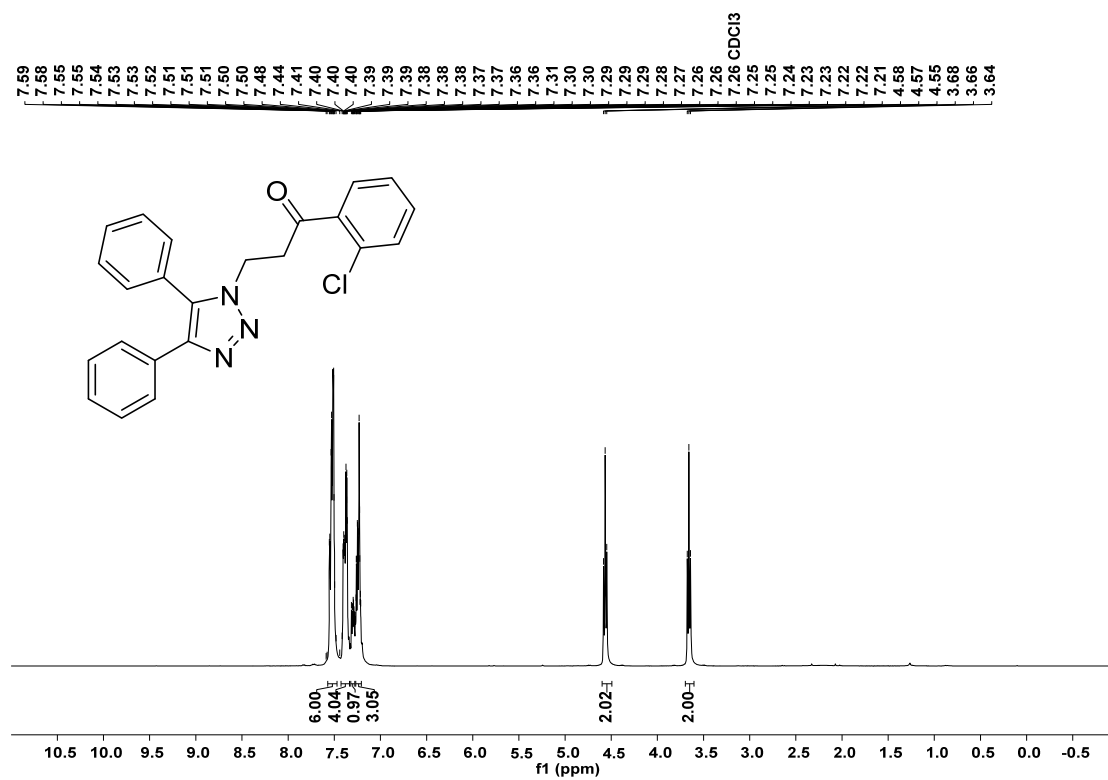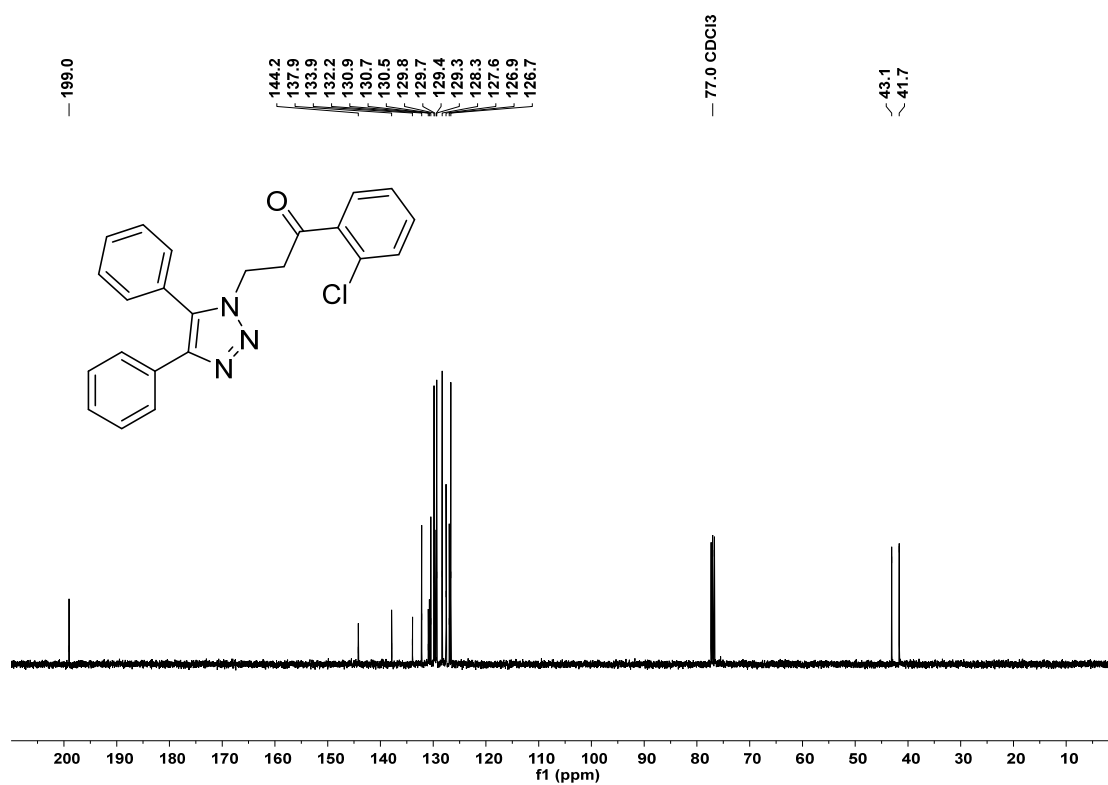

3-(4,5-diphenyl-2H-1,2,3-triazol-2-yl)-1-(4-methoxyphenyl)propan-1-one (**3q**)

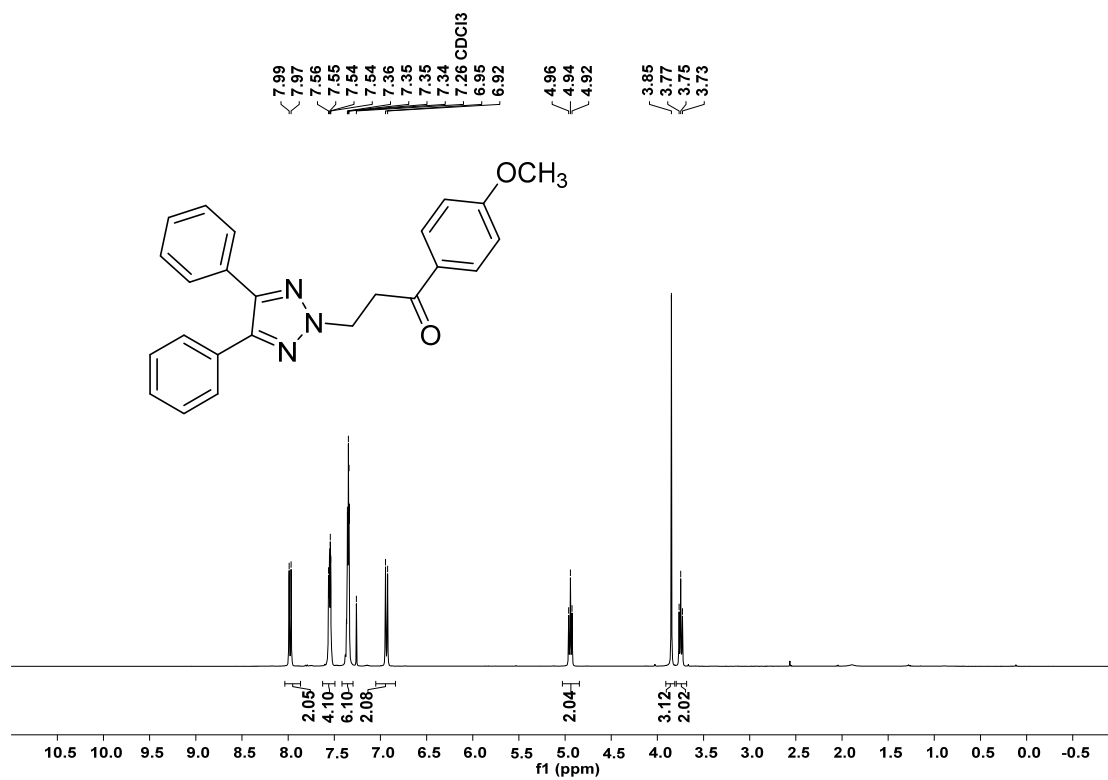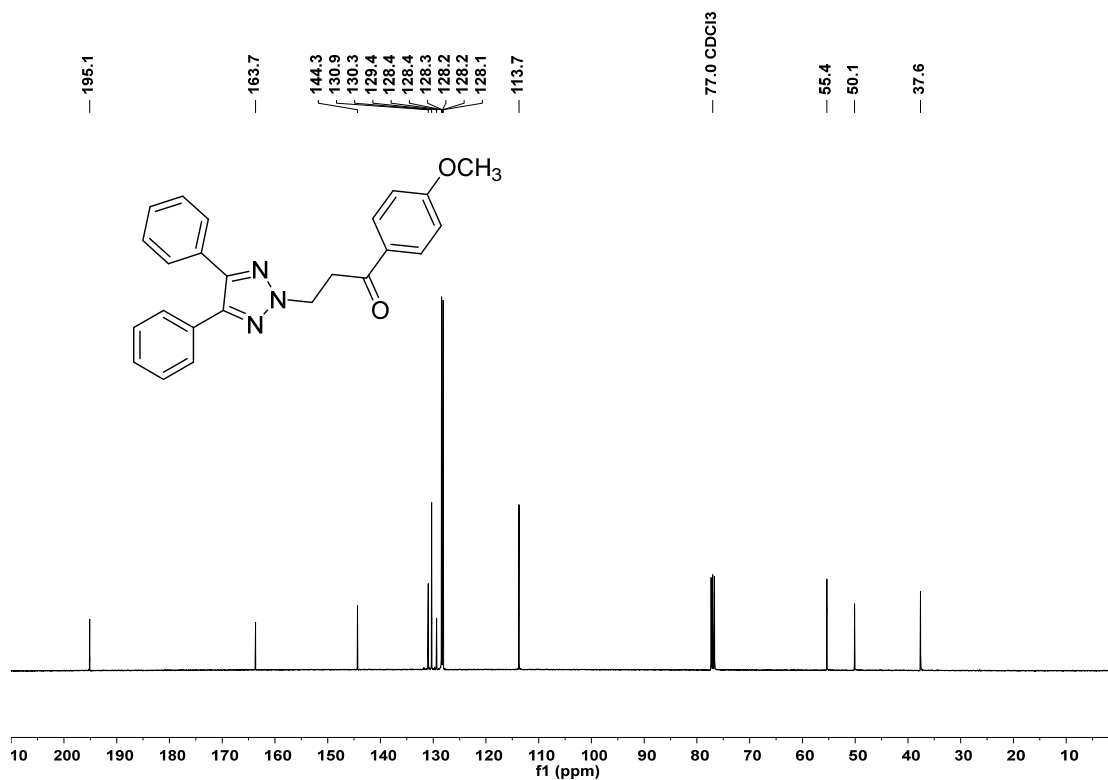

3-(4,5-diphenyl-1H-1,2,3-triazol-1-yl)-1-(4-methoxyphenyl)propan-1-one (**3'q**)

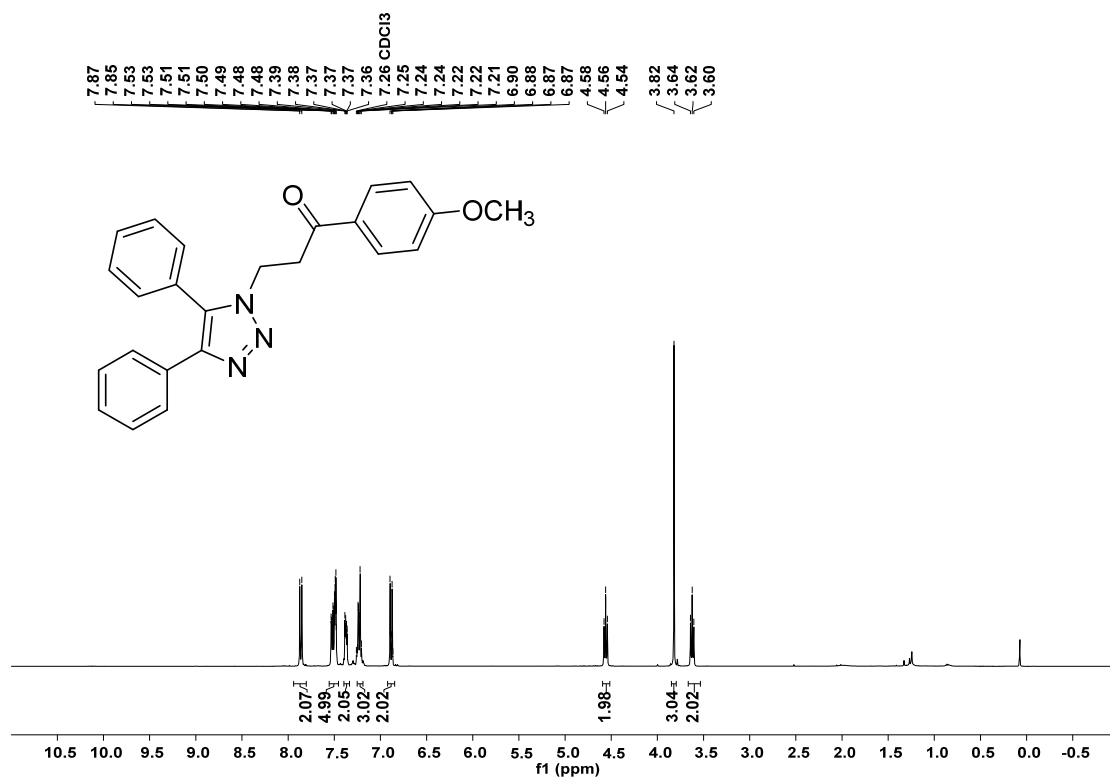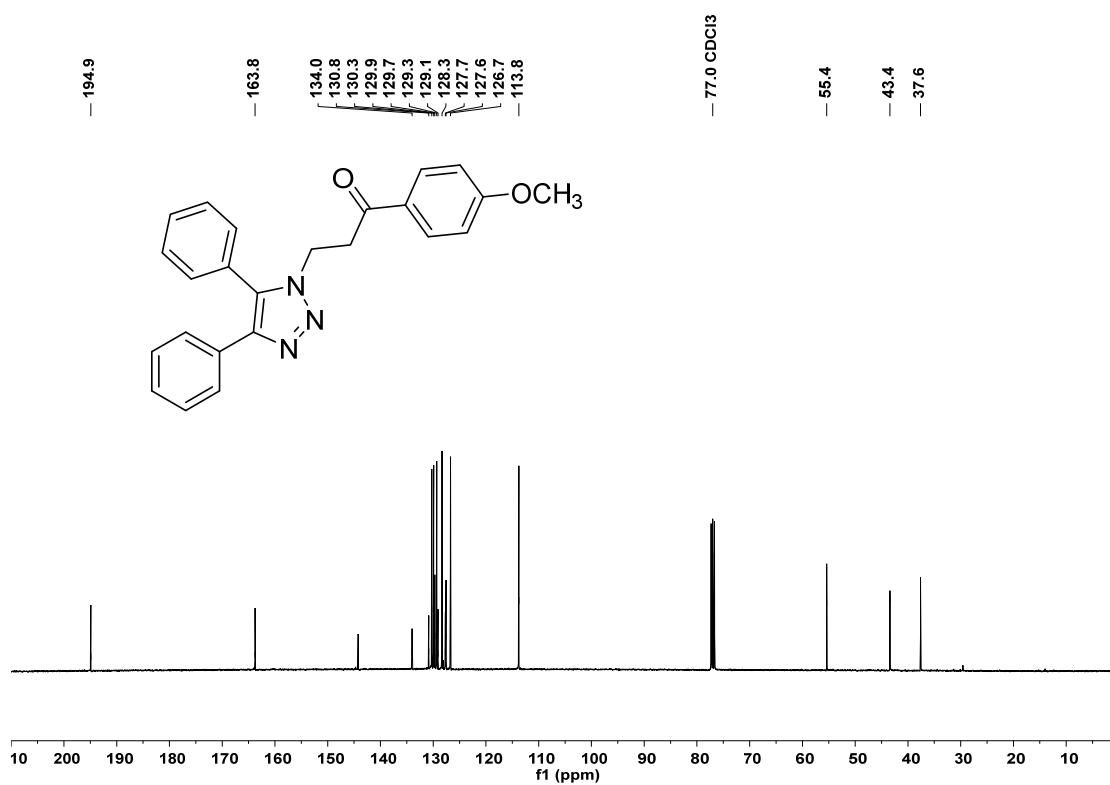

1-(4-chlorophenyl)-3-(4,5-diphenyl-2H-1,2,3-triazol-2-yl)propan-1-one (**3r**)

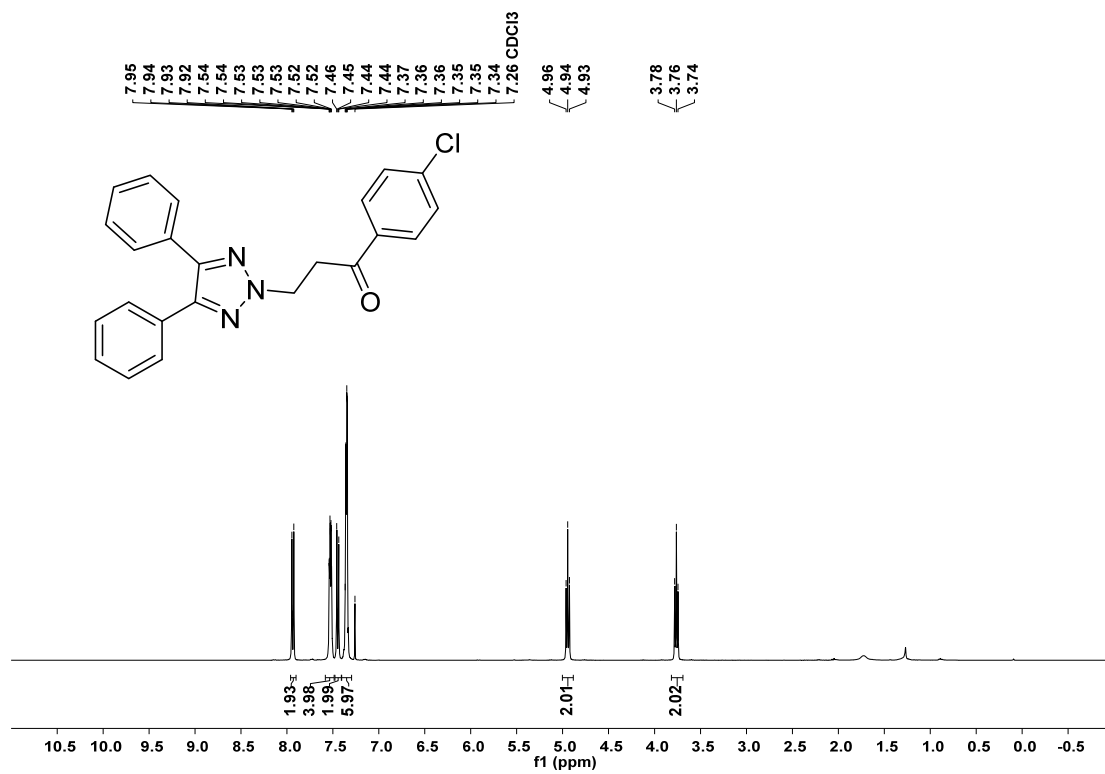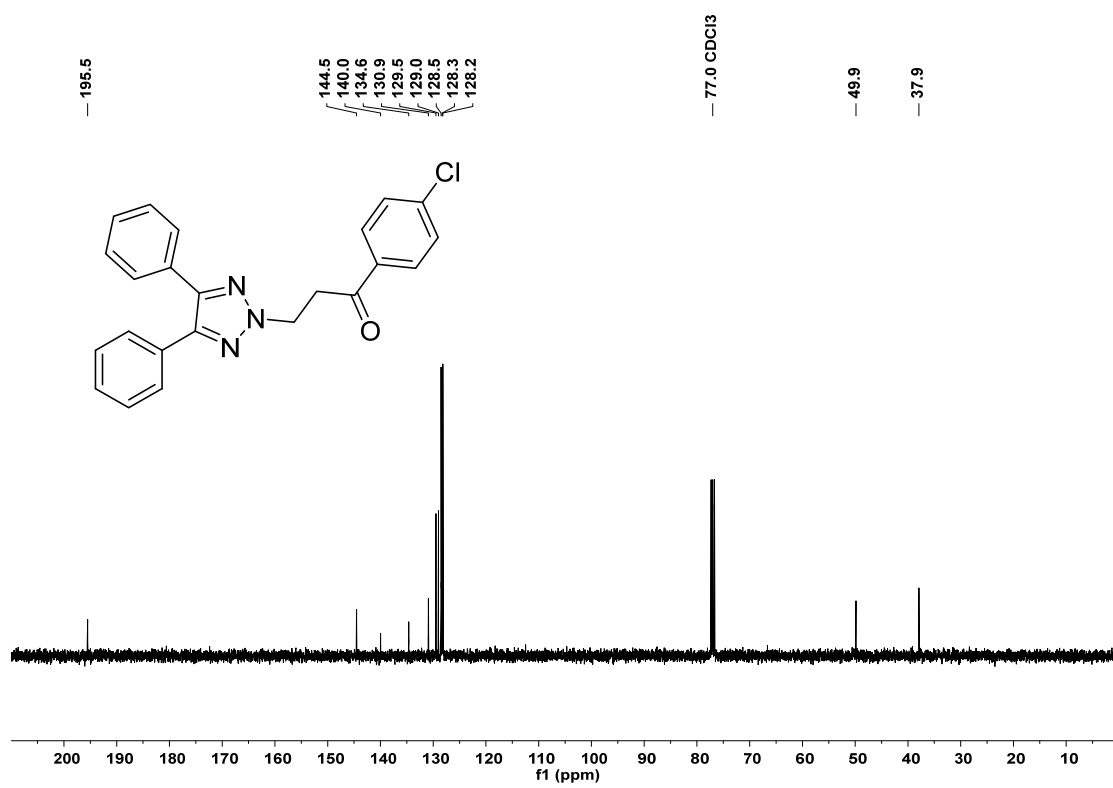

1-(4-chlorophenyl)-3-(4,5-diphenyl-1H-1,2,3-triazol-1-yl)propan-1-one (**3'r**)

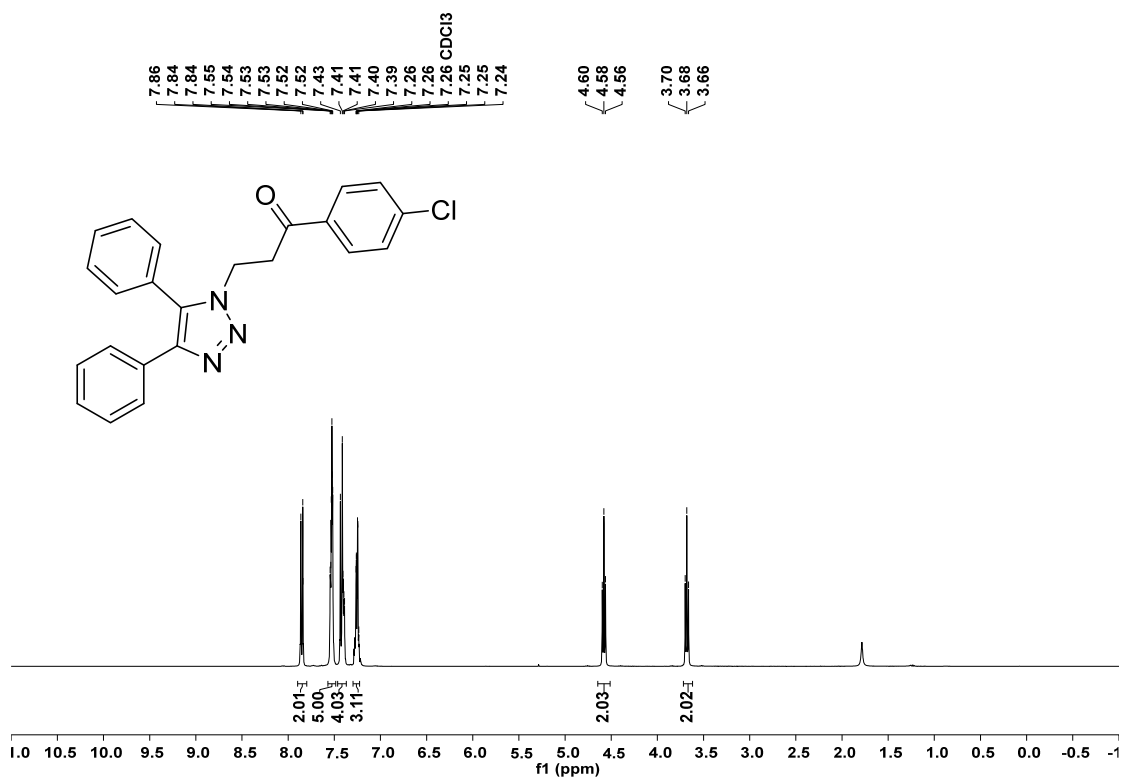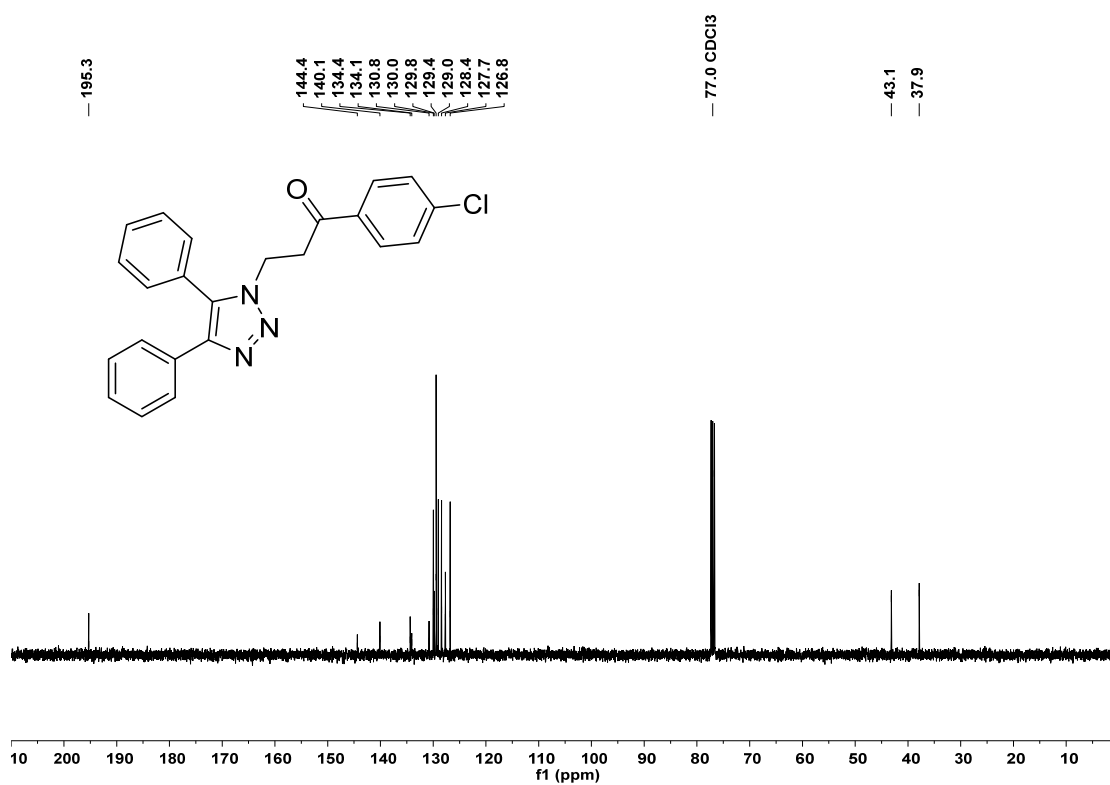



1-(4-bromophenyl)-3-(4,5-diphenyl-2H-1,2,3-triazol-2-yl)propan-1-one (**3s**)

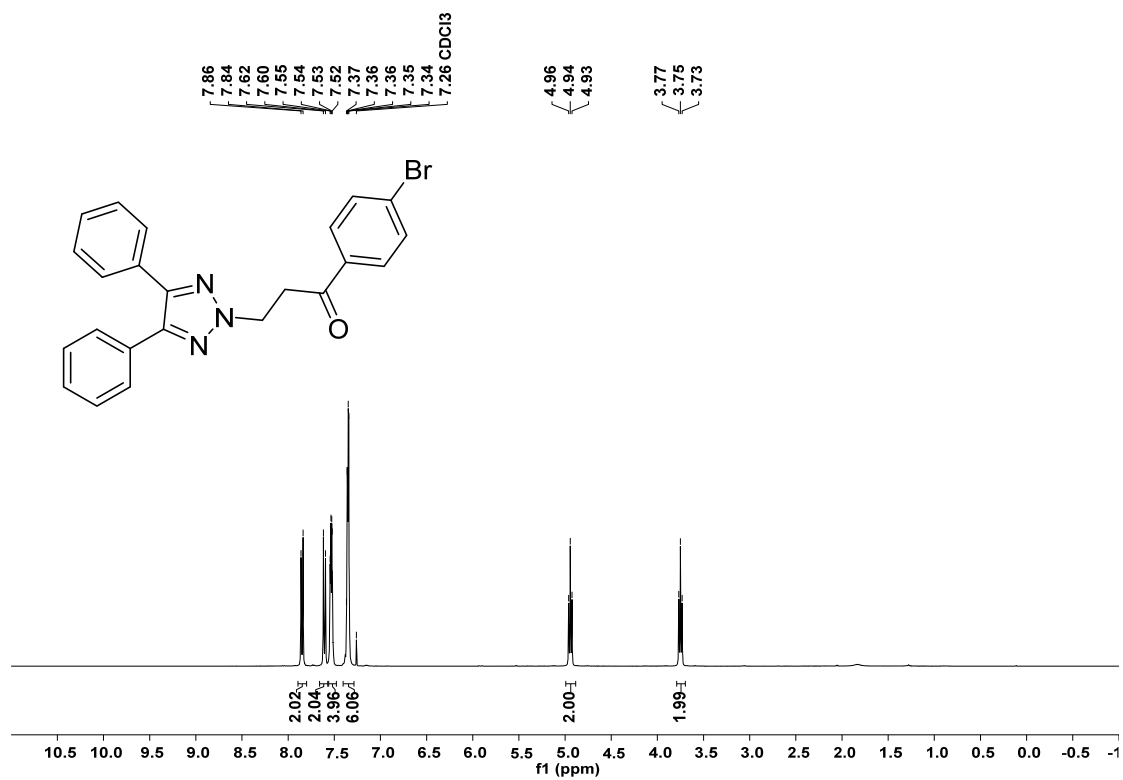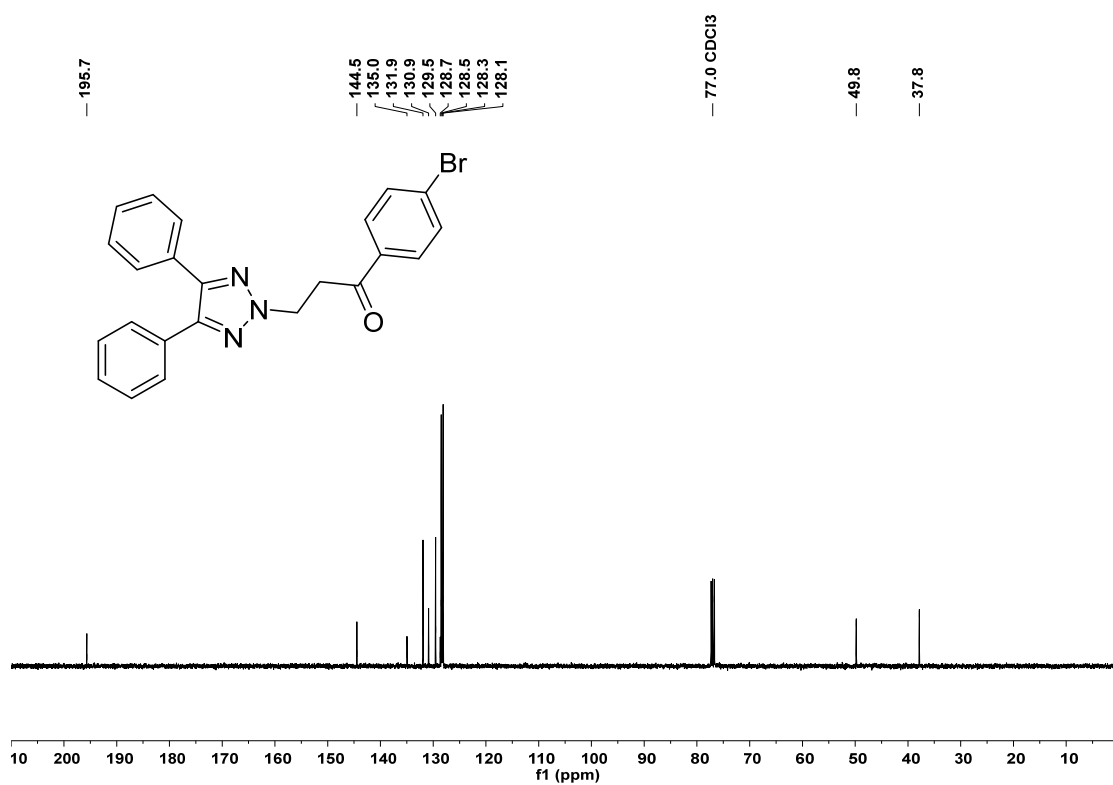

1-(4-bromophenyl)-3-(4,5-diphenyl-1H-1,2,3-triazol-1-yl)propan-1-one (**3's**)

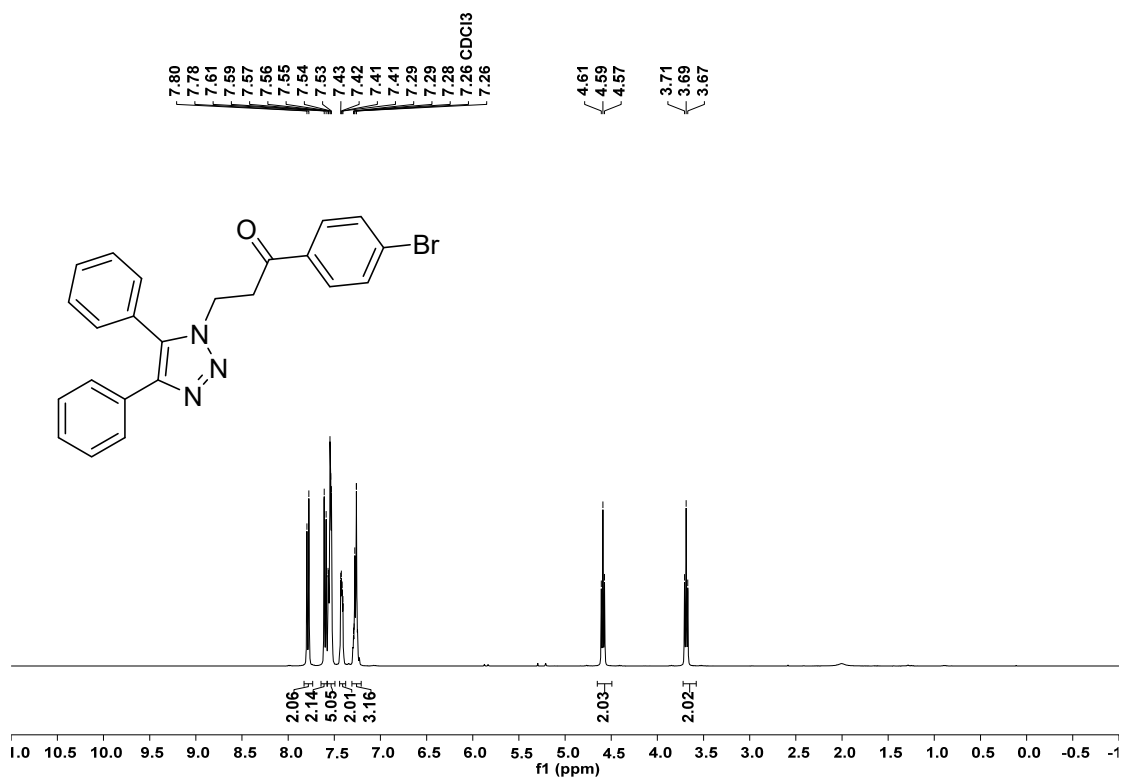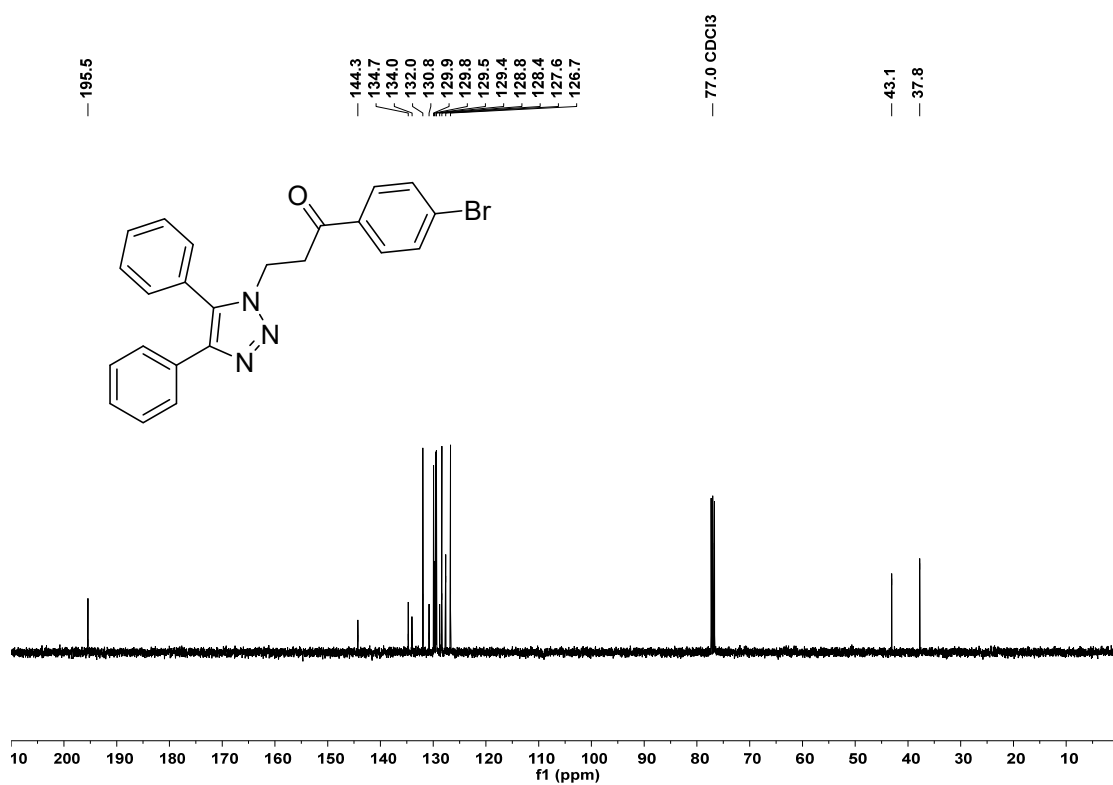

3-(4,5-diphenyl-2H-1,2,3-triazol-2-yl)-1-(naphthalen-2-yl)propan-1-one (**3t**)

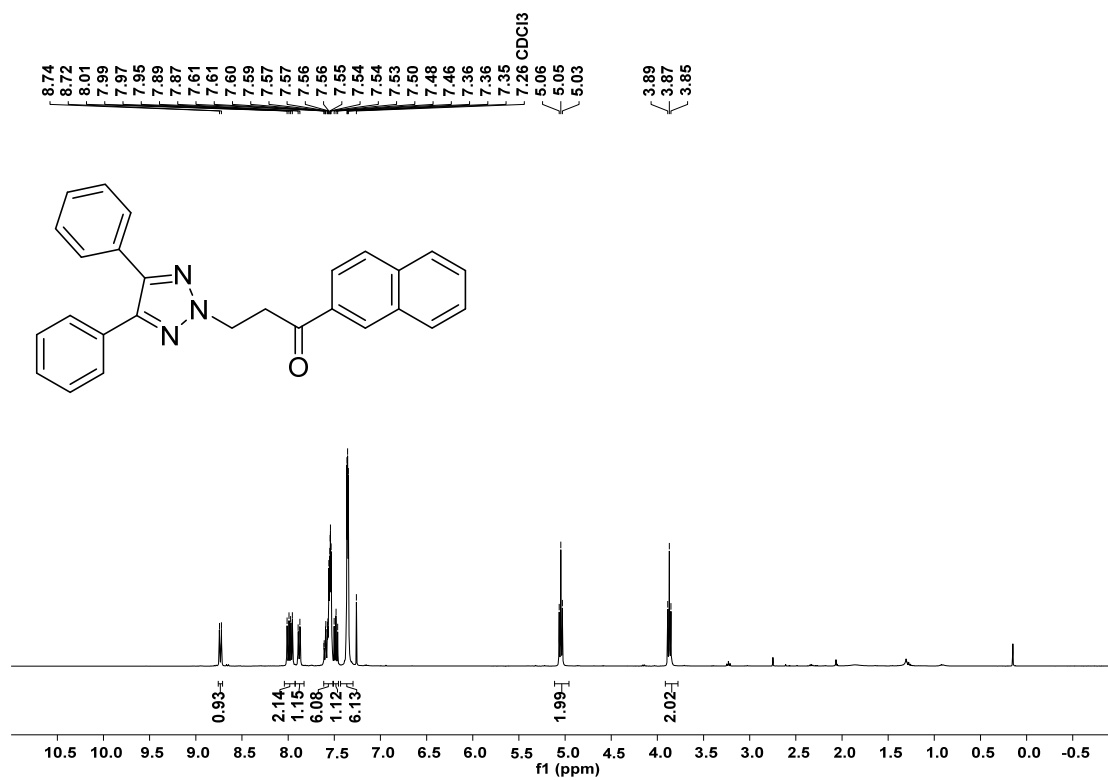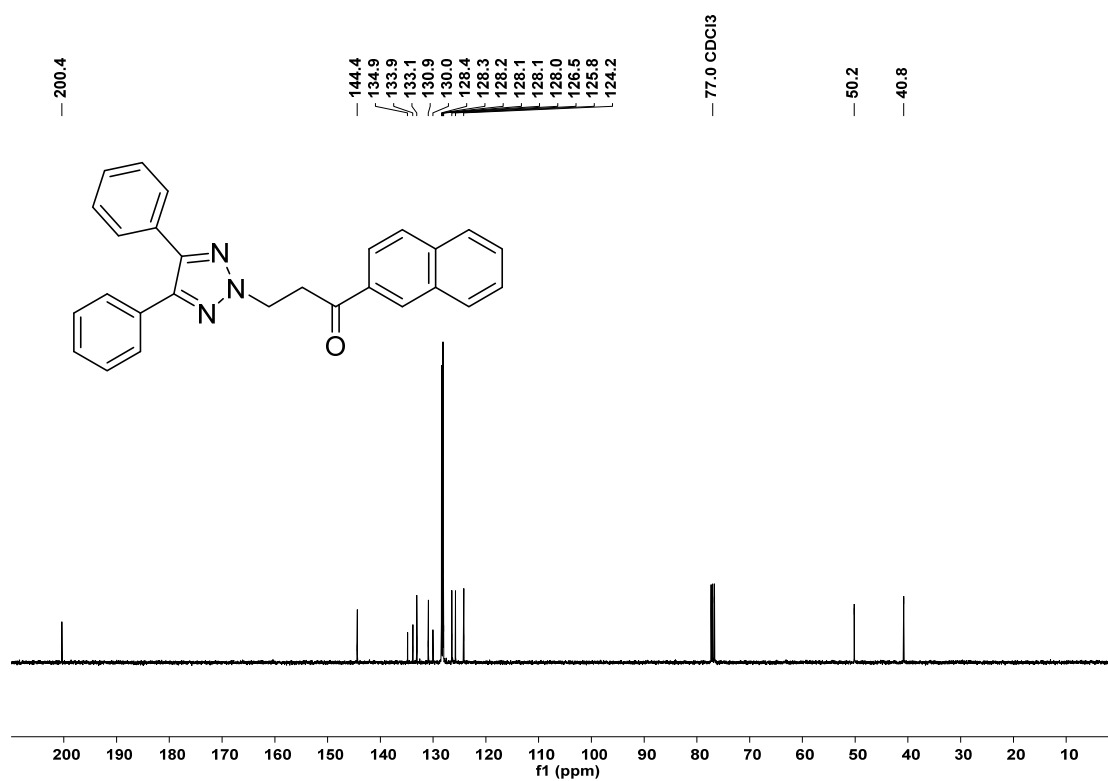

3-(4,5-diphenyl-1H-1,2,3-triazol-1-yl)-1-(naphthalen-2-yl)propan-1-one (**3't**)

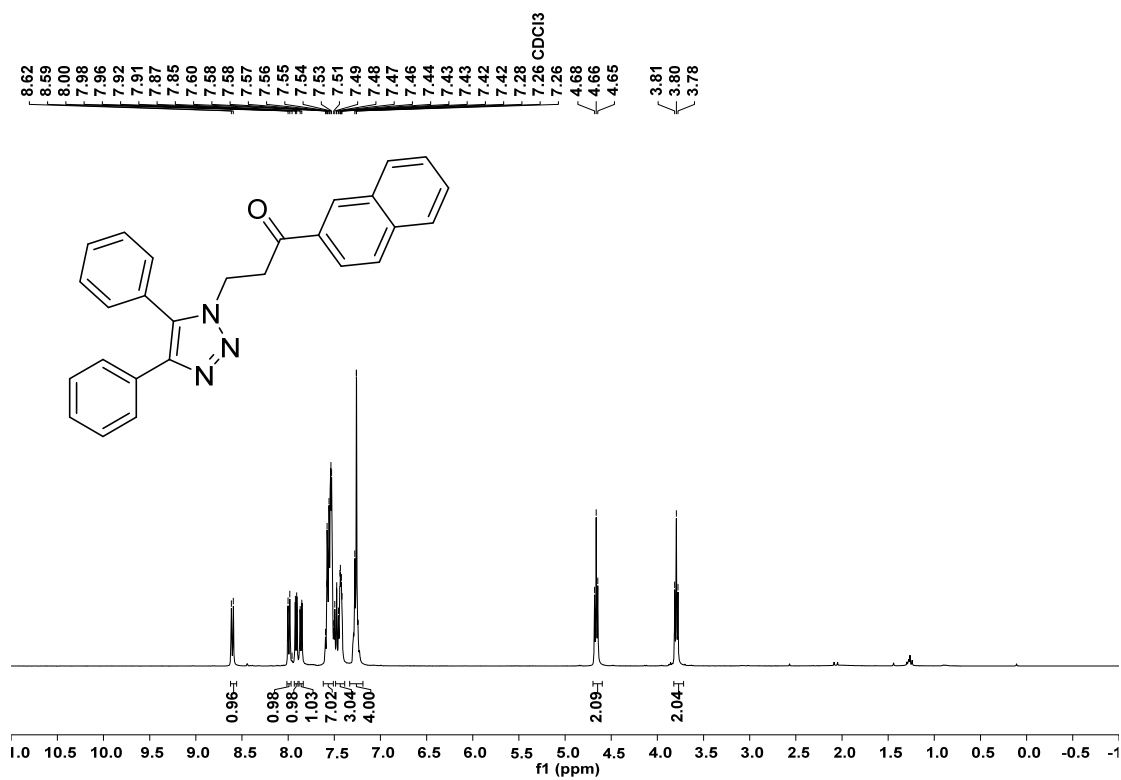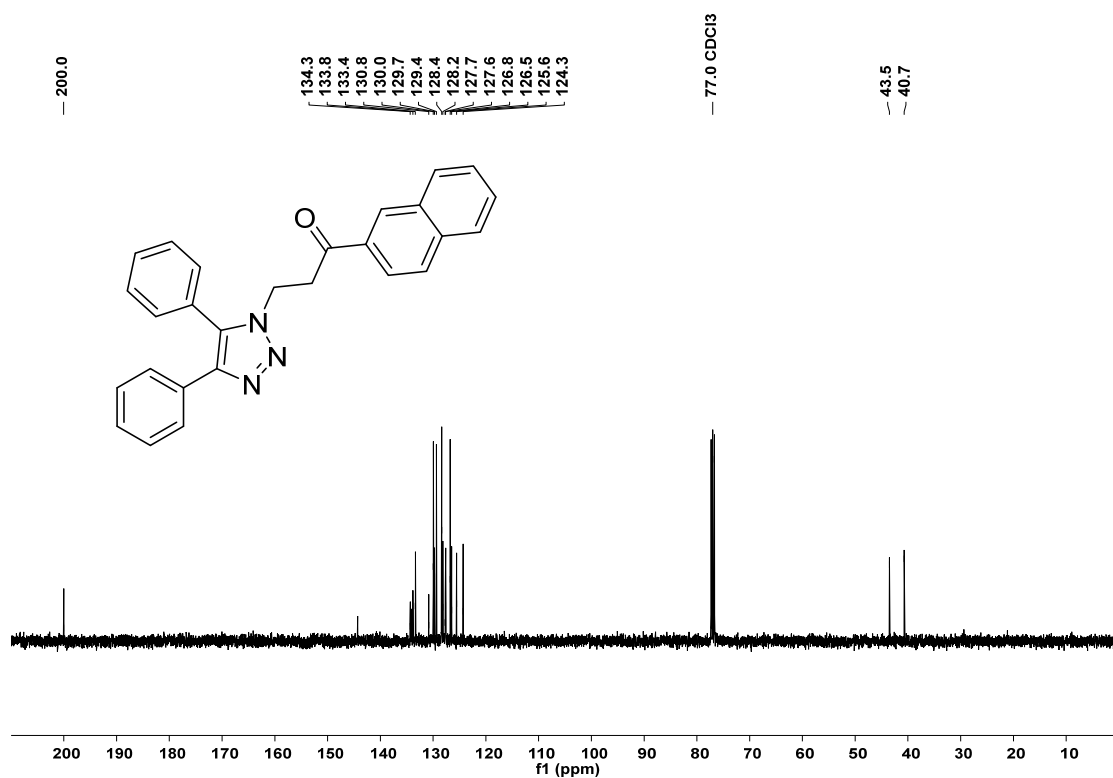

3-(4,5-diphenyl-2H-1,2,3-triazol-2-yl)-1-(thiophen-2-yl)propan-1-one (**3u**)

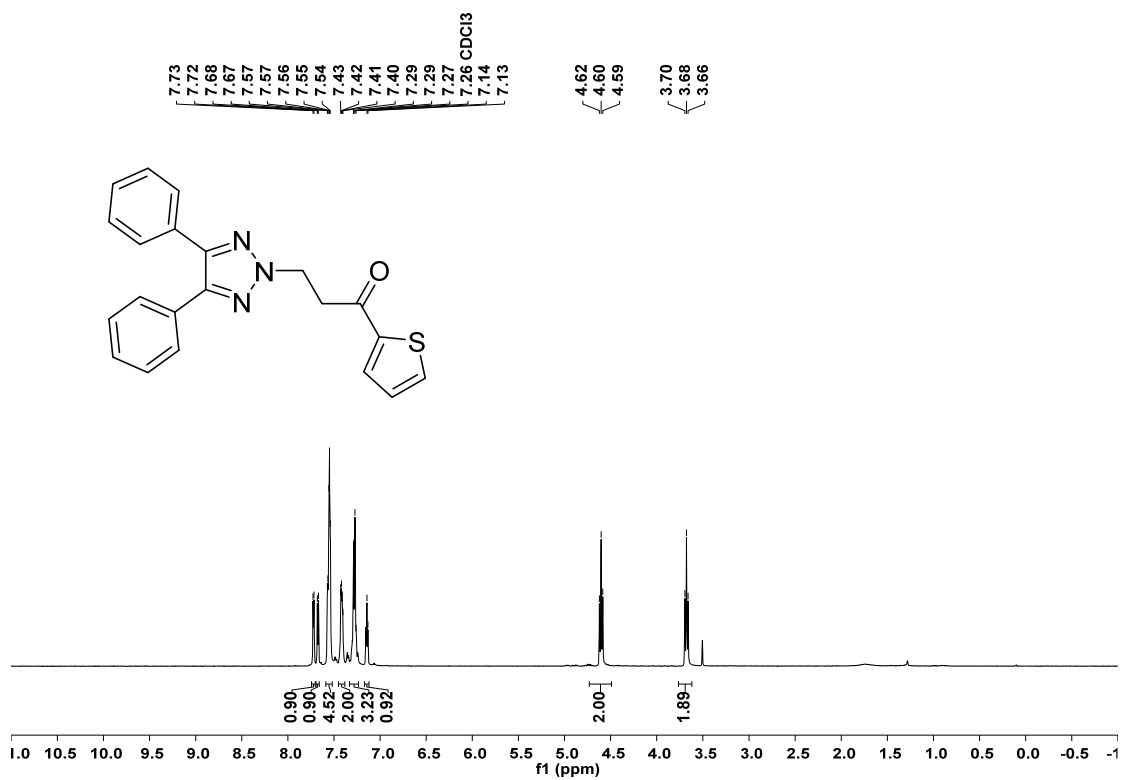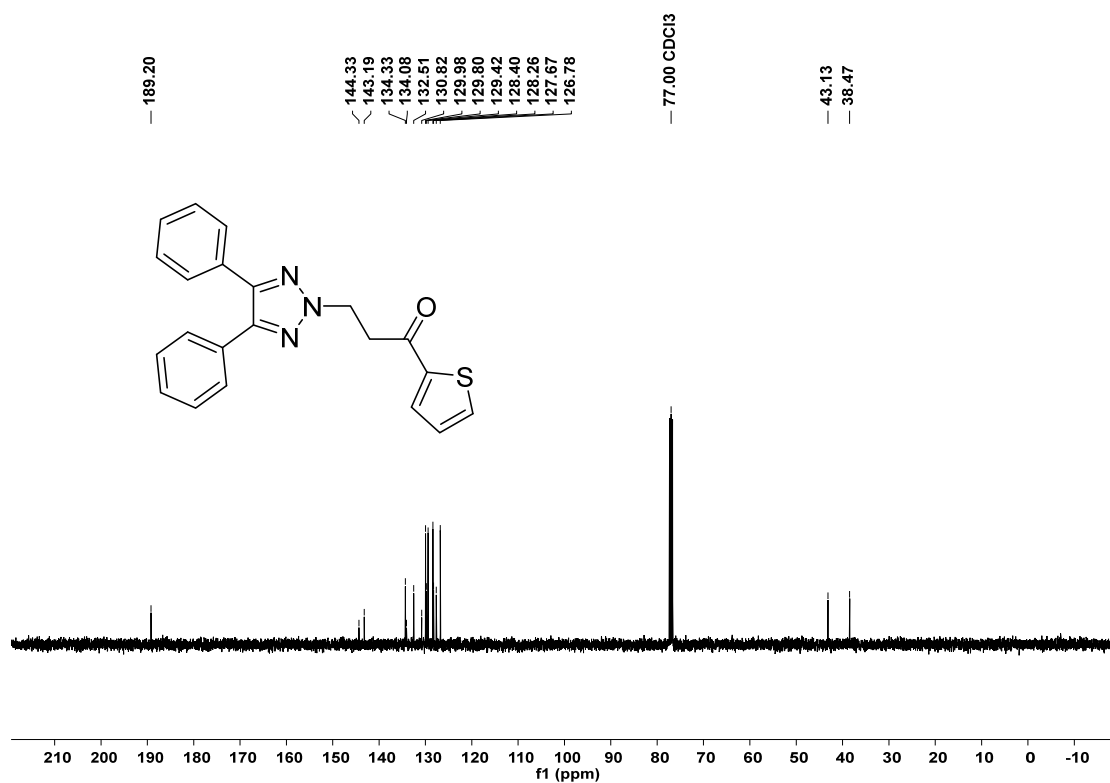

3-(4,5-diphenyl-1H-1,2,3-triazol-1-yl)-1-(thiophen-2-yl)propan-1-one (**3'u**)

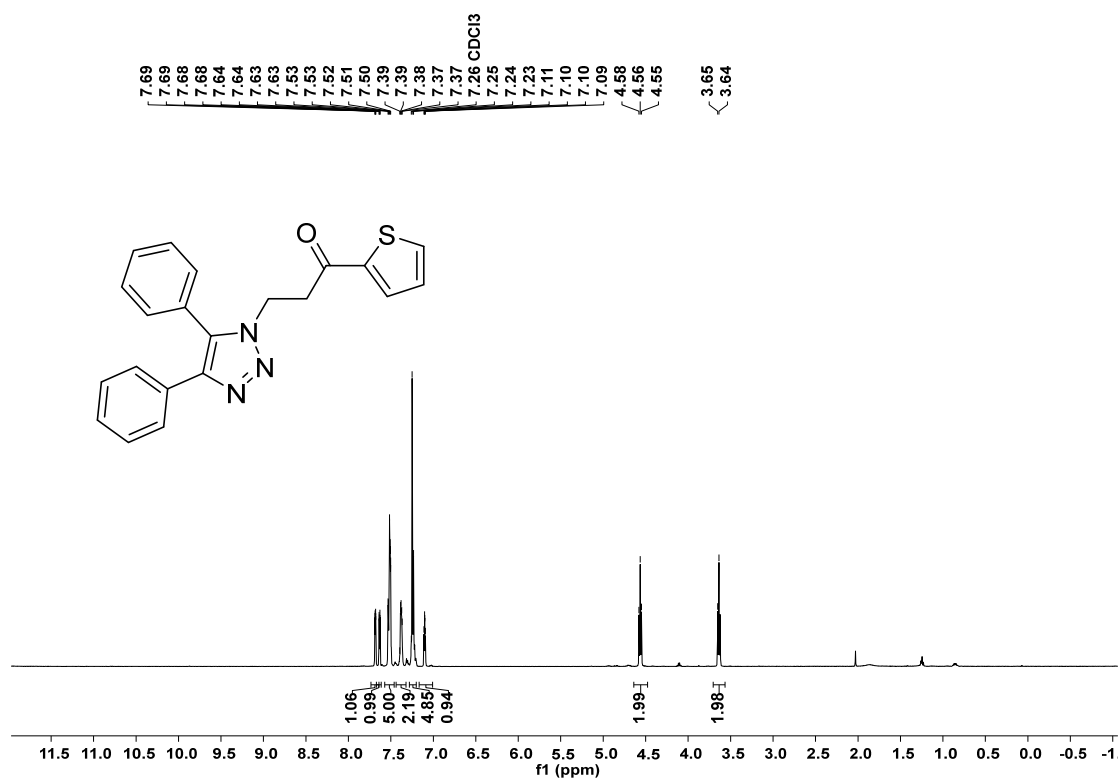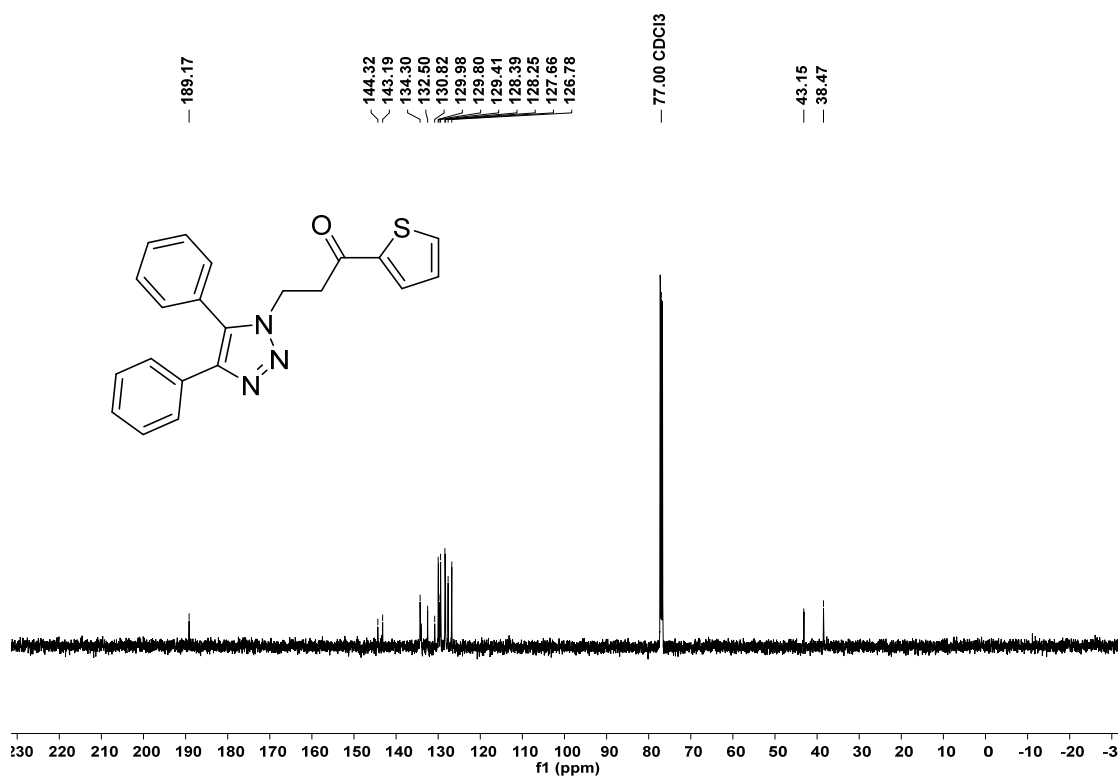

3-(4-(4-methoxyphenyl)-5-phenyl-2H-1,2,3-triazol-2-yl)-1-phenylpropan-1-one (**3v**)

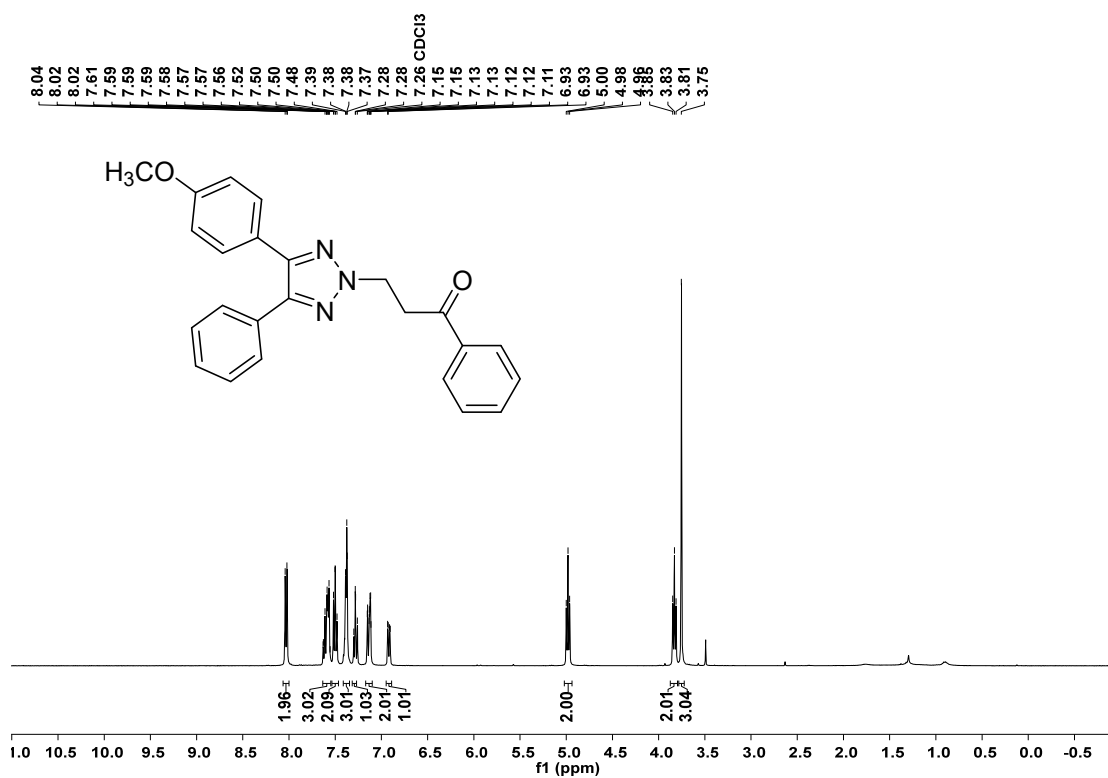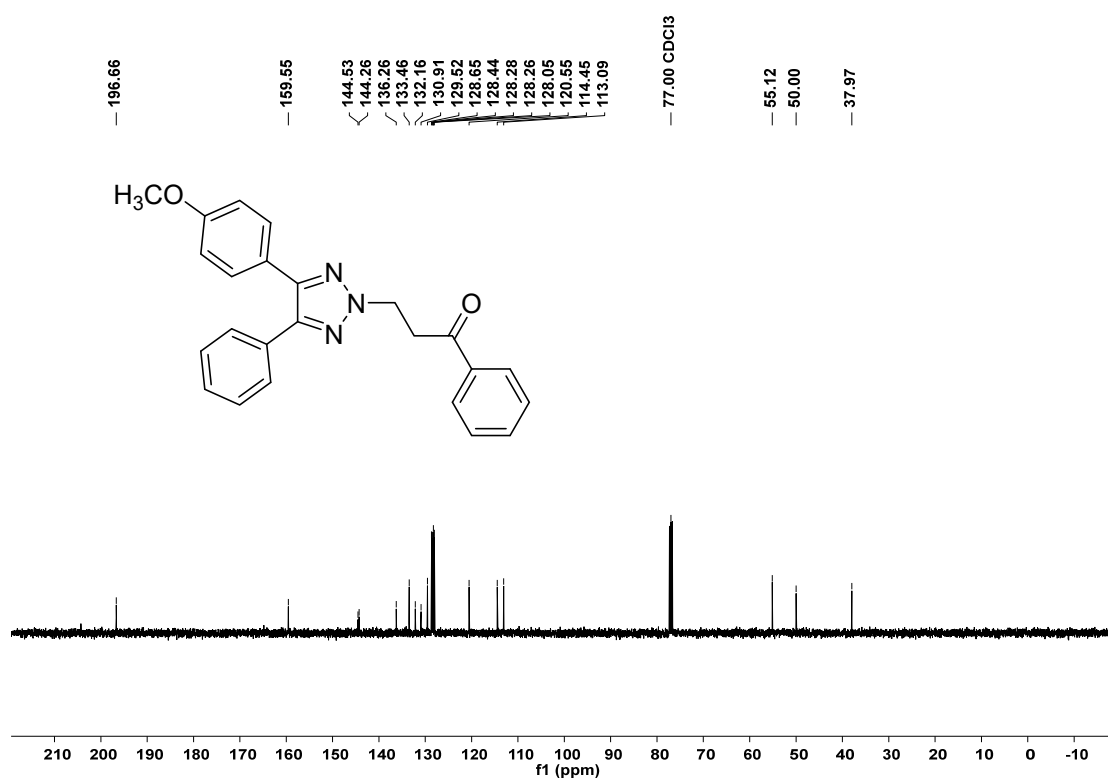

3-(4-(4-methoxyphenyl)-5-phenyl-1*H*-1,2,3-triazol-1-yl)-1-phenylpropan-1-one and 3-(5-(4-methoxyphenyl)-4-phenyl-1*H*-1,2,3-triazol-1-yl)-1-phenylpropan-1-one (**3'v**)

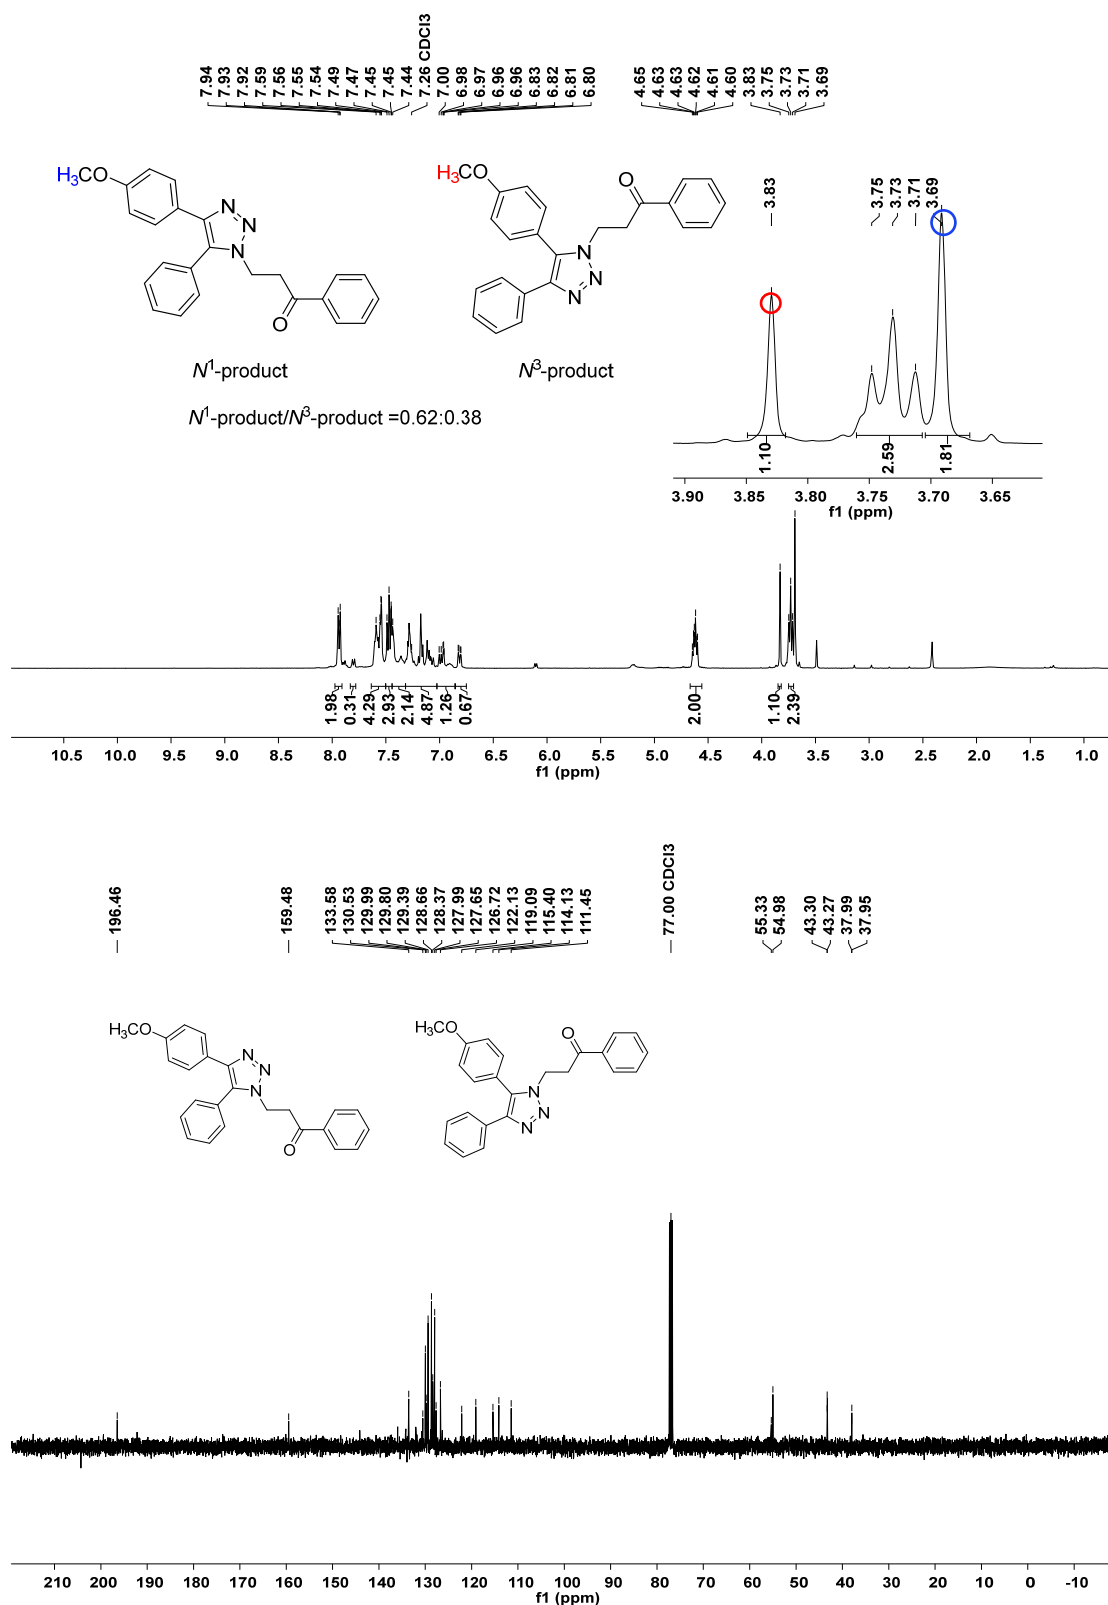



3-(4-pentyl-5-phenyl-2H-1,2,3-triazol-2-yl)-1-phenylpropan-1-one (**3w**)

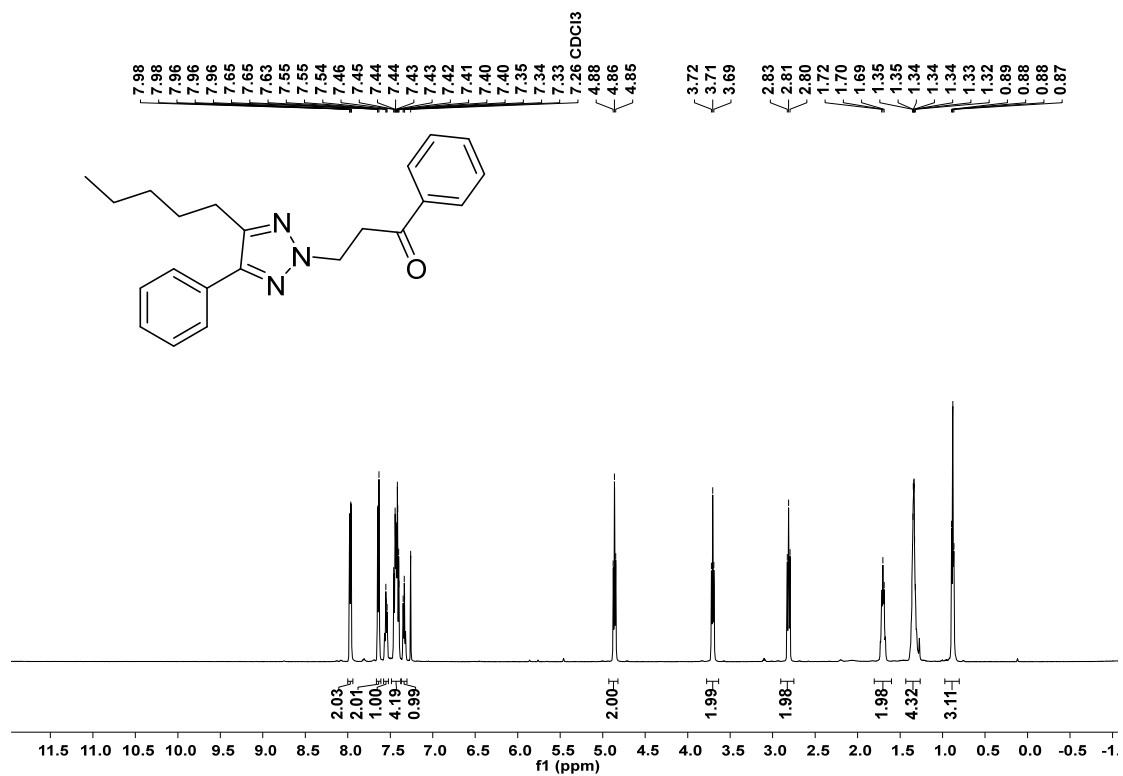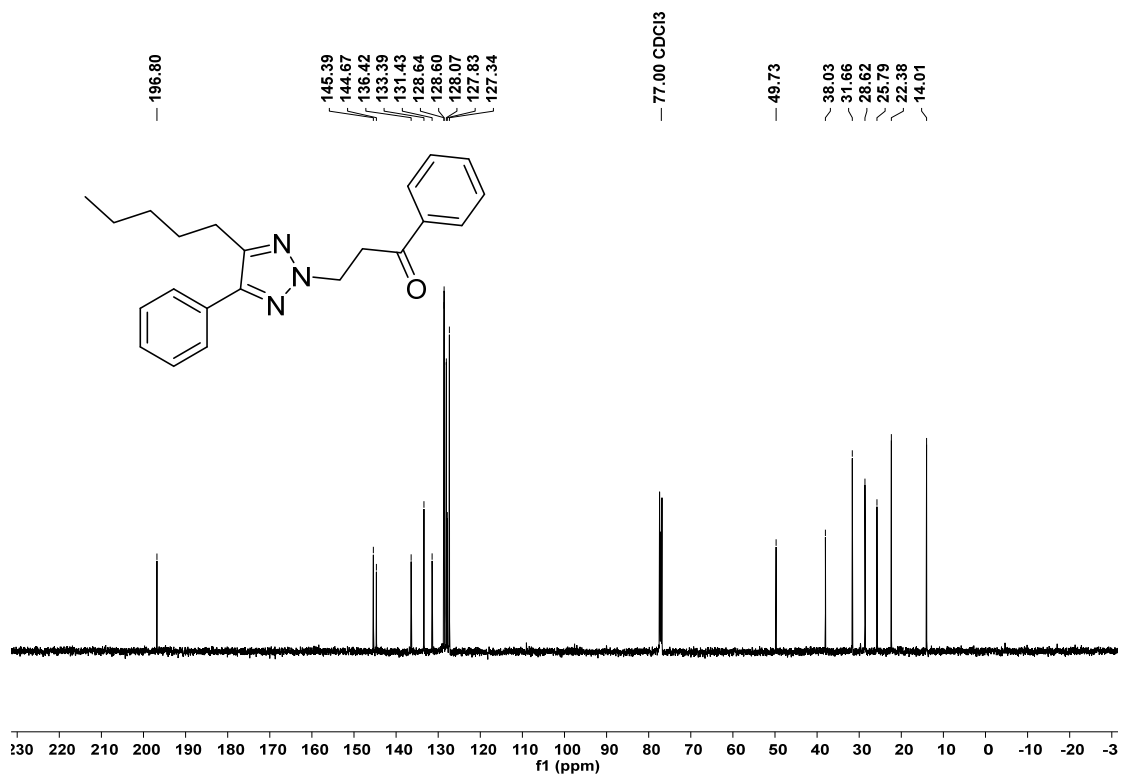

3-(5-pentyl-4-phenyl-1H-1,2,3-triazol-1-yl)-1-phenylpropan-1-one and 3-(4-pentyl-5-phenyl-1H-1,2,3-triazol-1-yl)-1-phenylpropan-1-one (**3'w**)

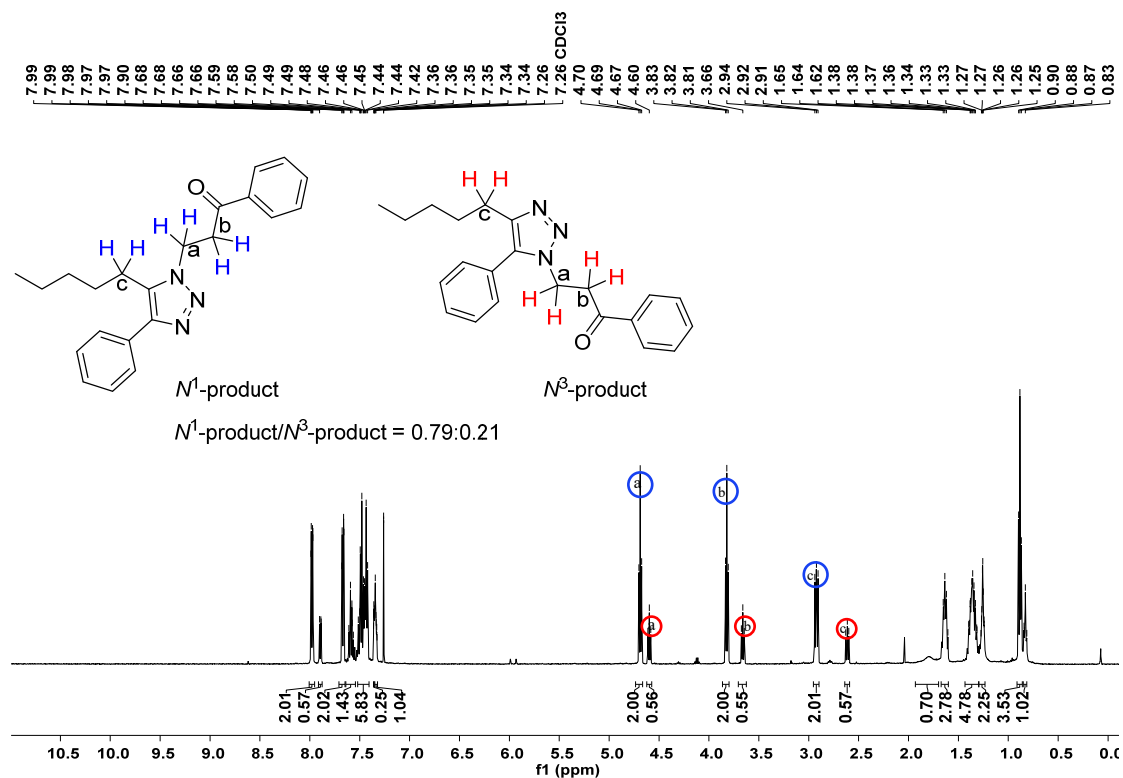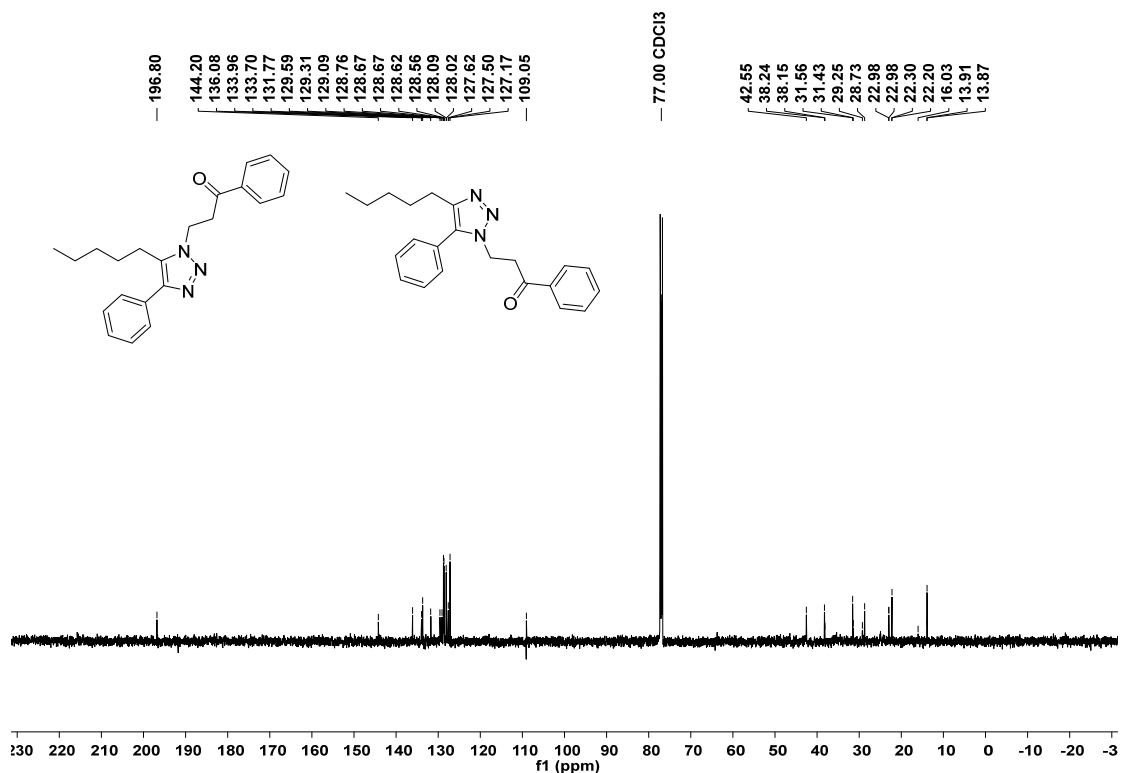

1-phenyl-3-(4-phenyl-5-(p-tolyl)-2H-1,2,3-triazol-2-yl)propan-1-one (**3x**)

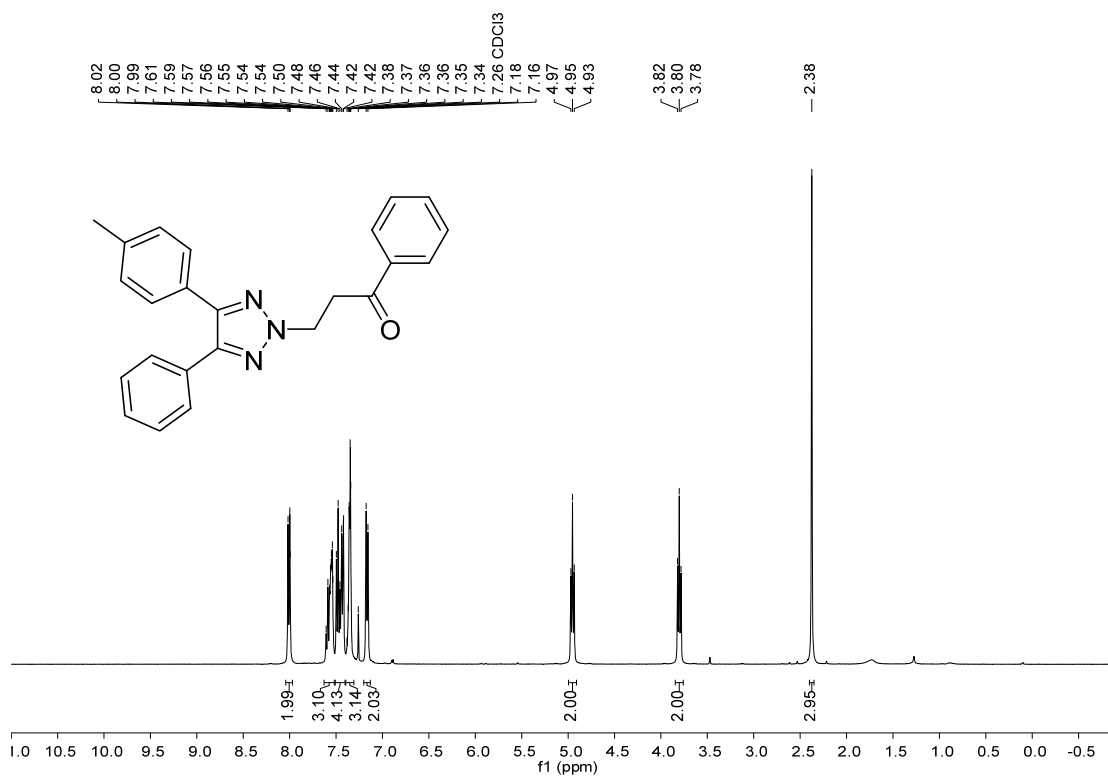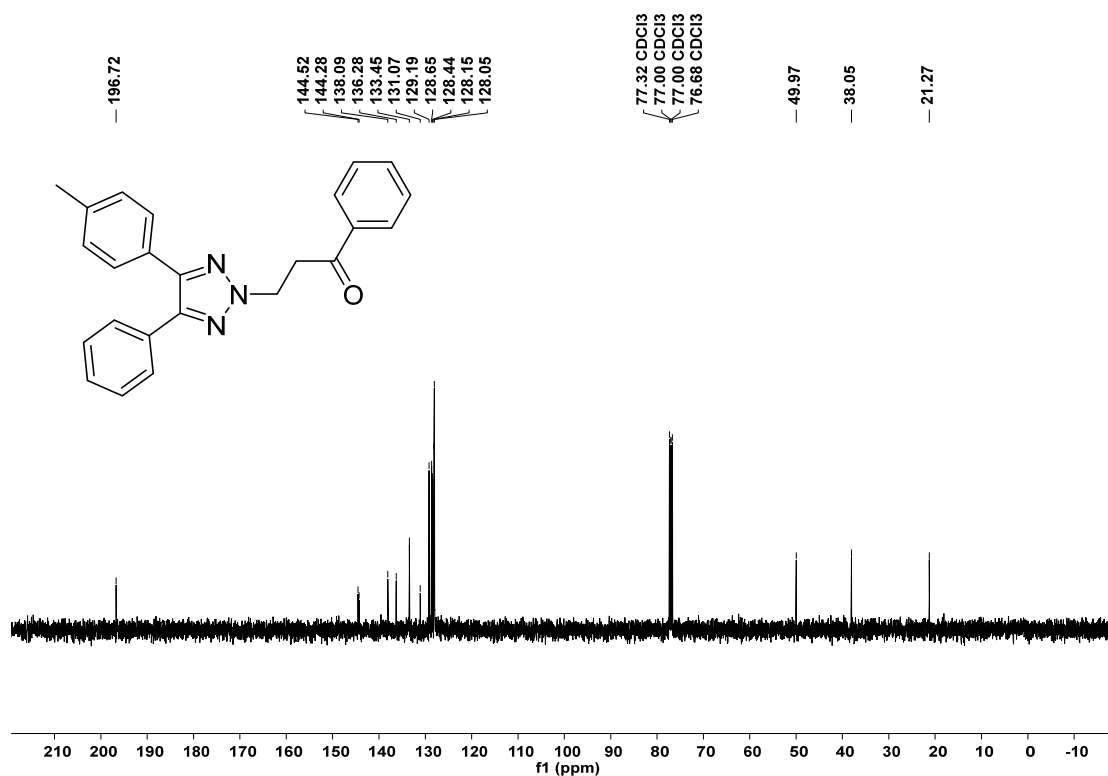

1-phenyl-3-(4-phenyl-5-(p-tolyl)-1H-1,2,3-triazol-1-yl)propan-1-one and 1-phenyl-3-(5-phenyl-4-(p-tolyl)-1H-1,2,3-triazol-1-yl)propan-1-one (**3'**x)

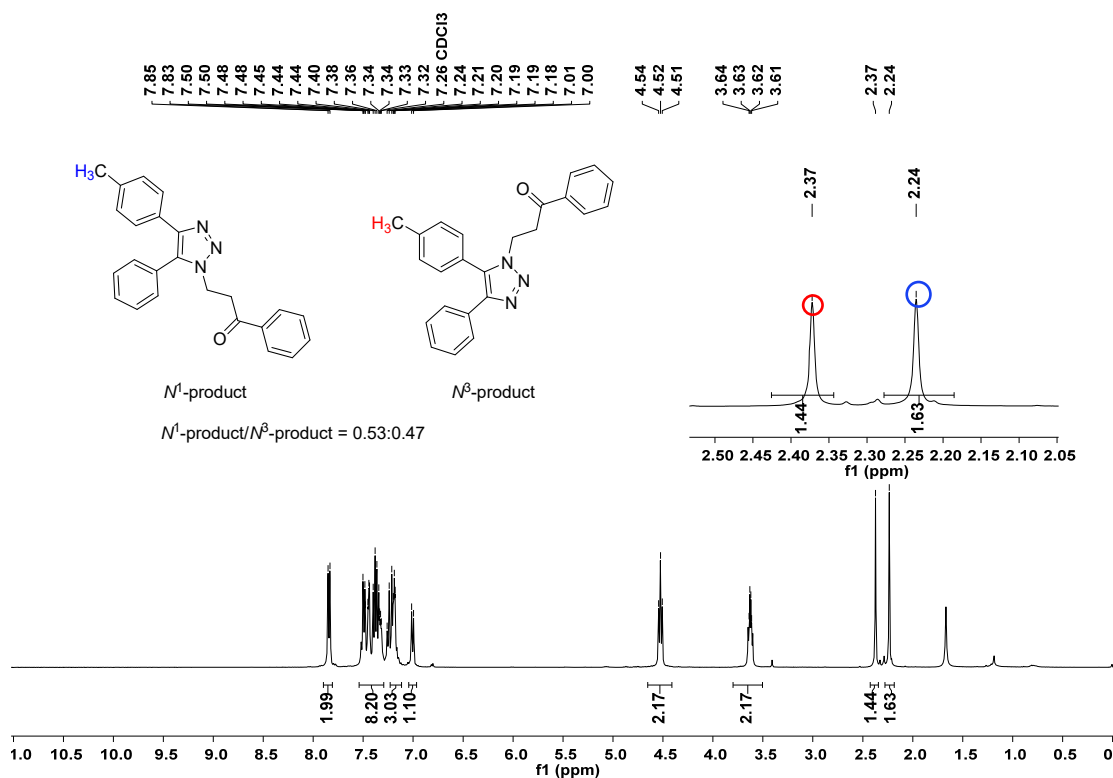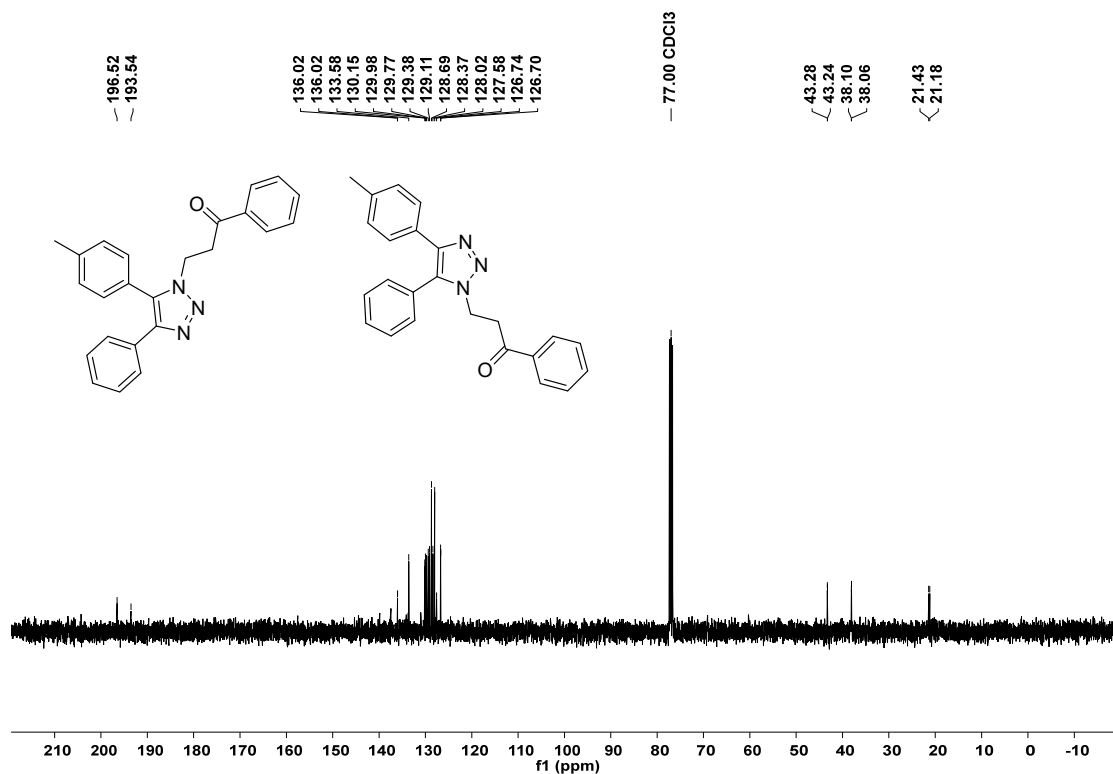

3-(4-bromo-5-phenyl-2H-1,2,3-triazol-2-yl)-1-phenylpropan-1-one (**4a**)

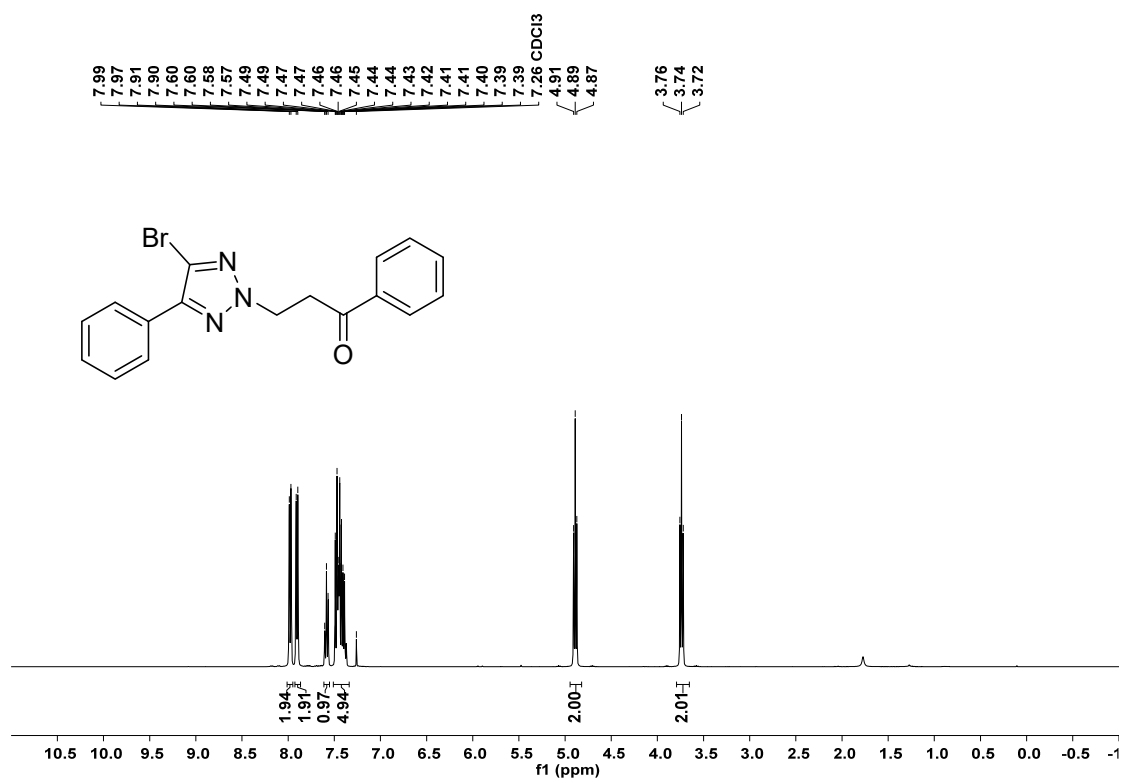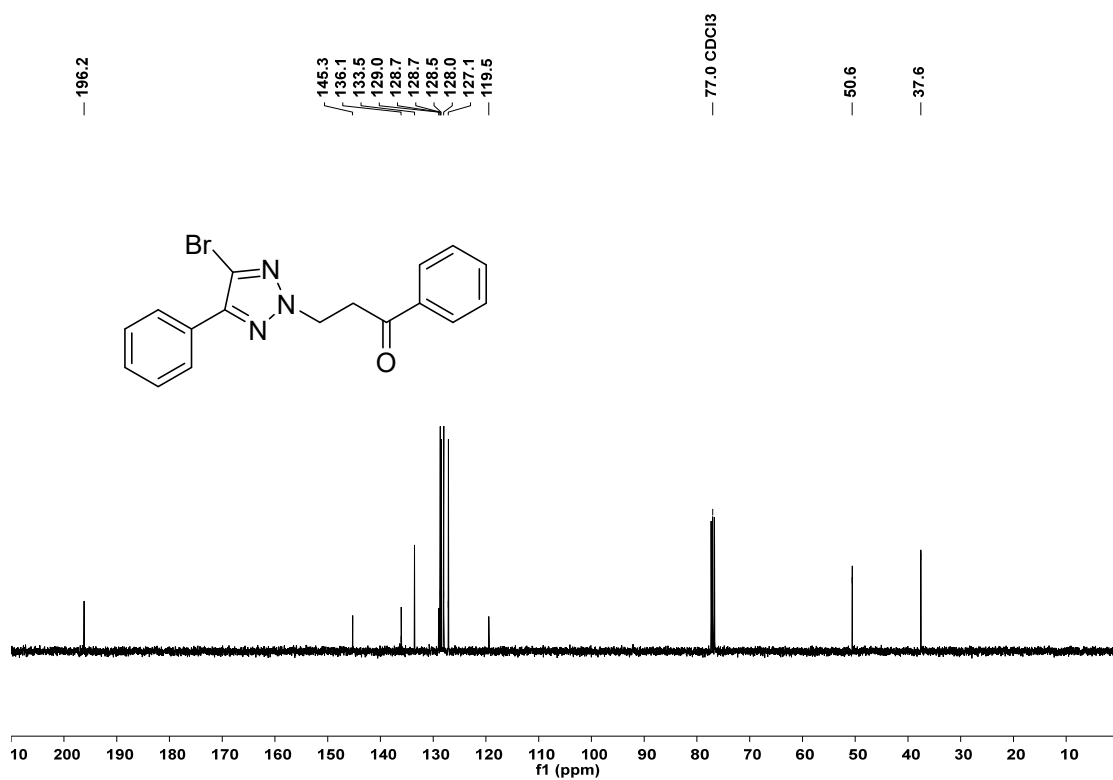

3-(4-bromo-5-phenyl-2H-1,2,3-triazol-2-yl)-1-(2-chlorophenyl)propan-1-one (**4b**)

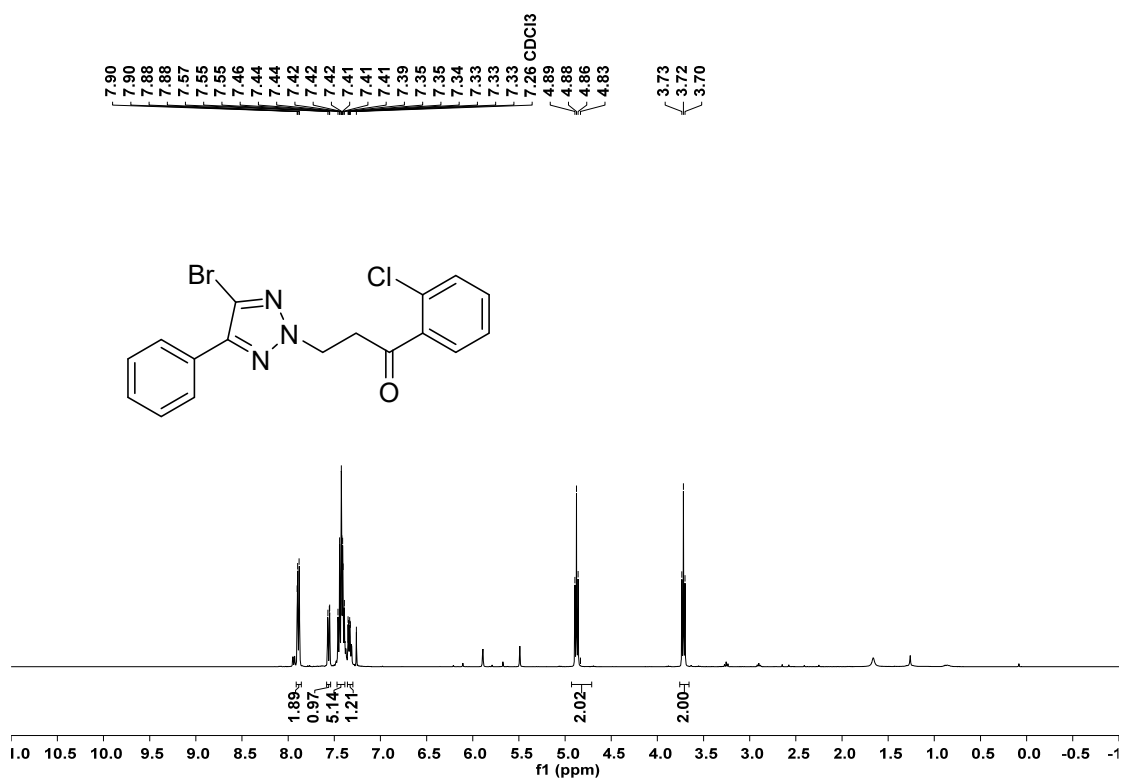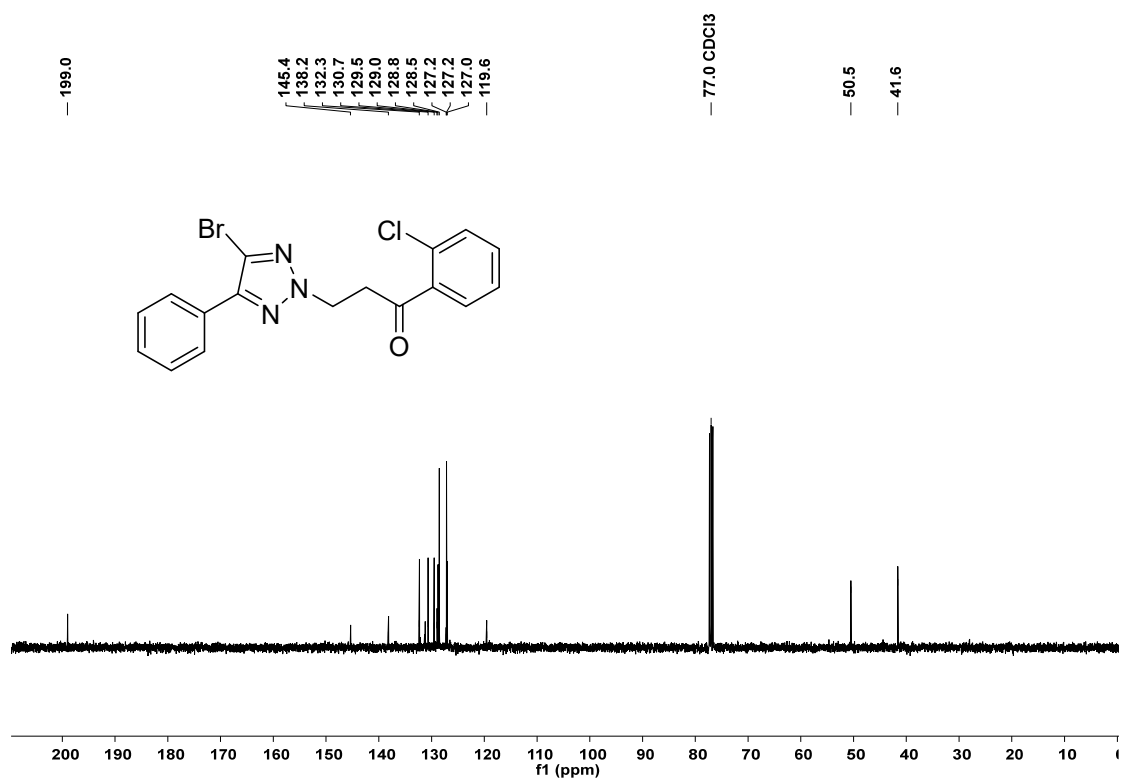

3-(4-bromo-5-phenyl-2H-1,2,3-triazol-2-yl)-1-(4-methoxyphenyl)propan-1-one (**4c**)

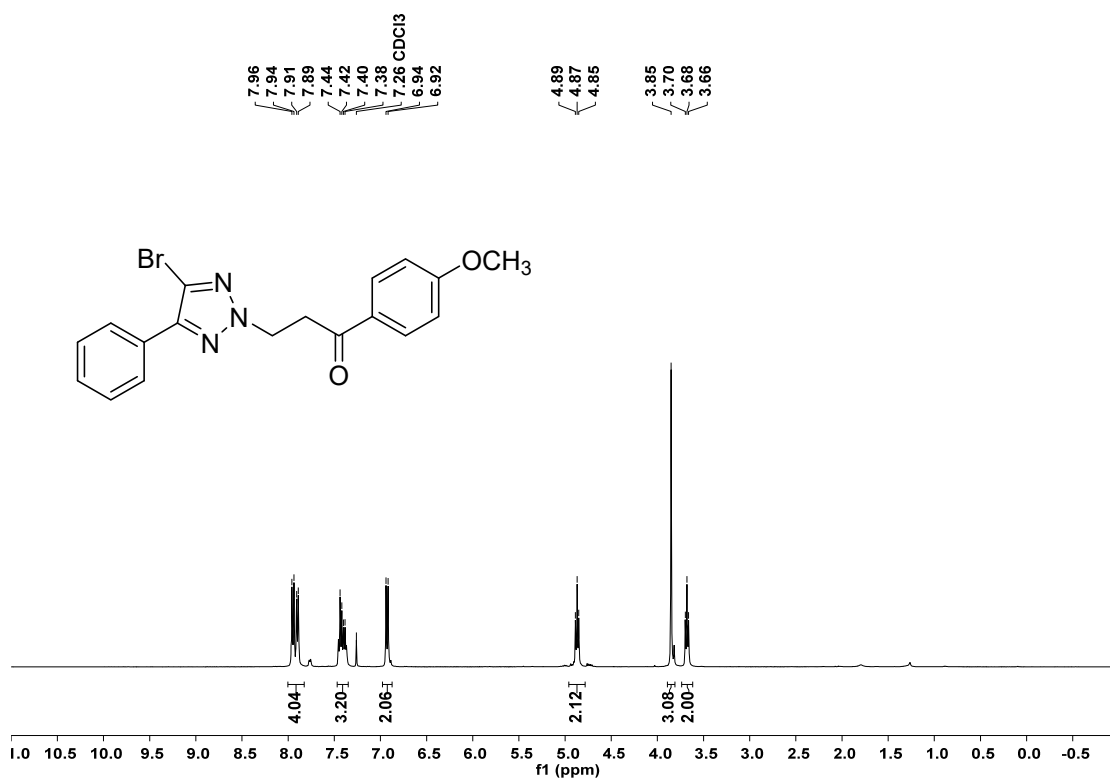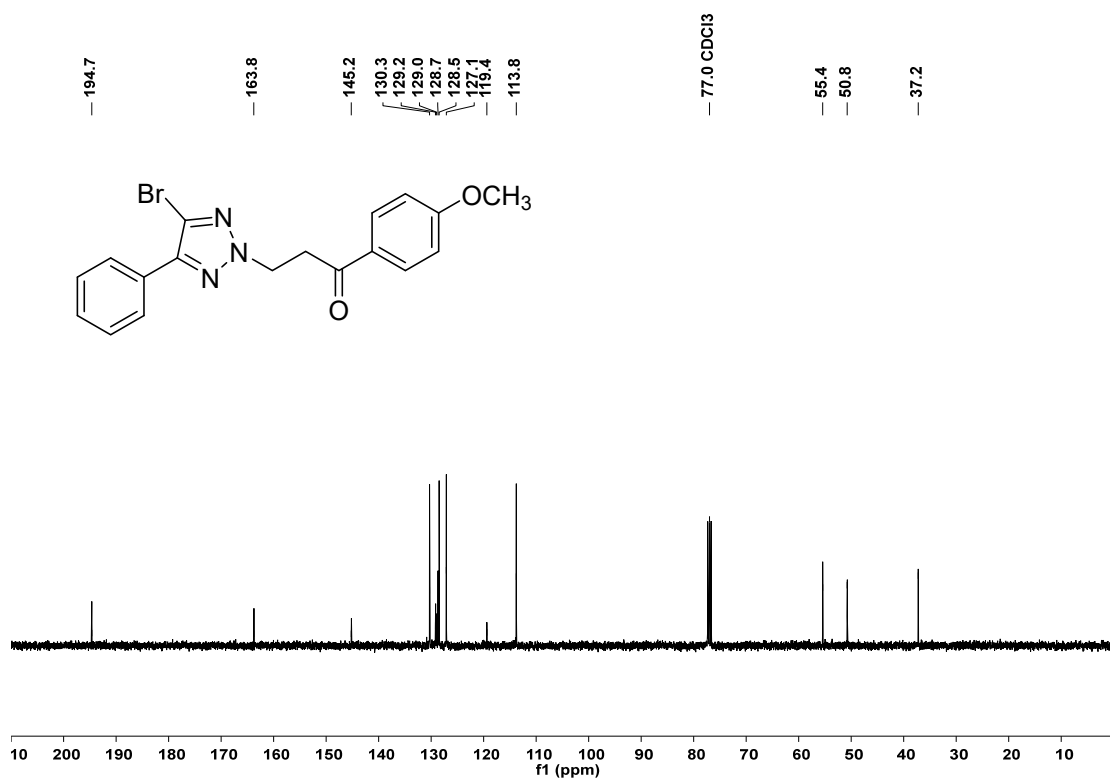

3-(4-bromo-5-phenyl-2H-1,2,3-triazol-2-yl)-1-(naphthalen-2-yl)propan-1-one (**4d**)

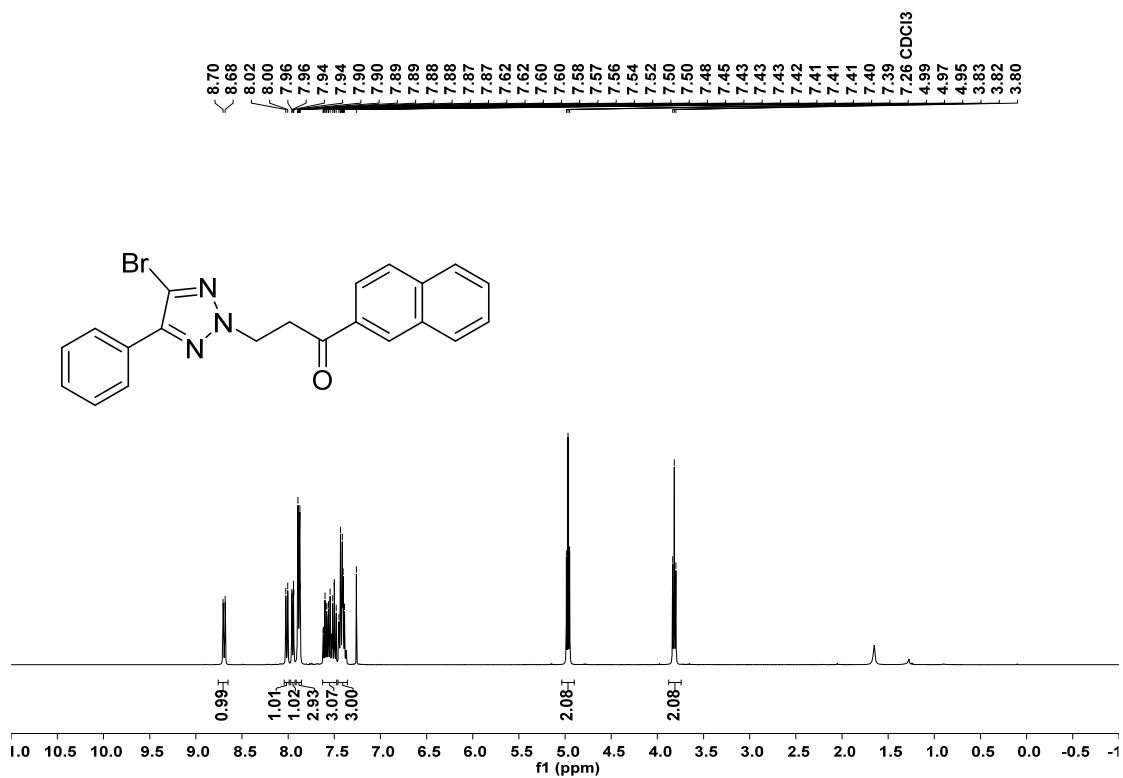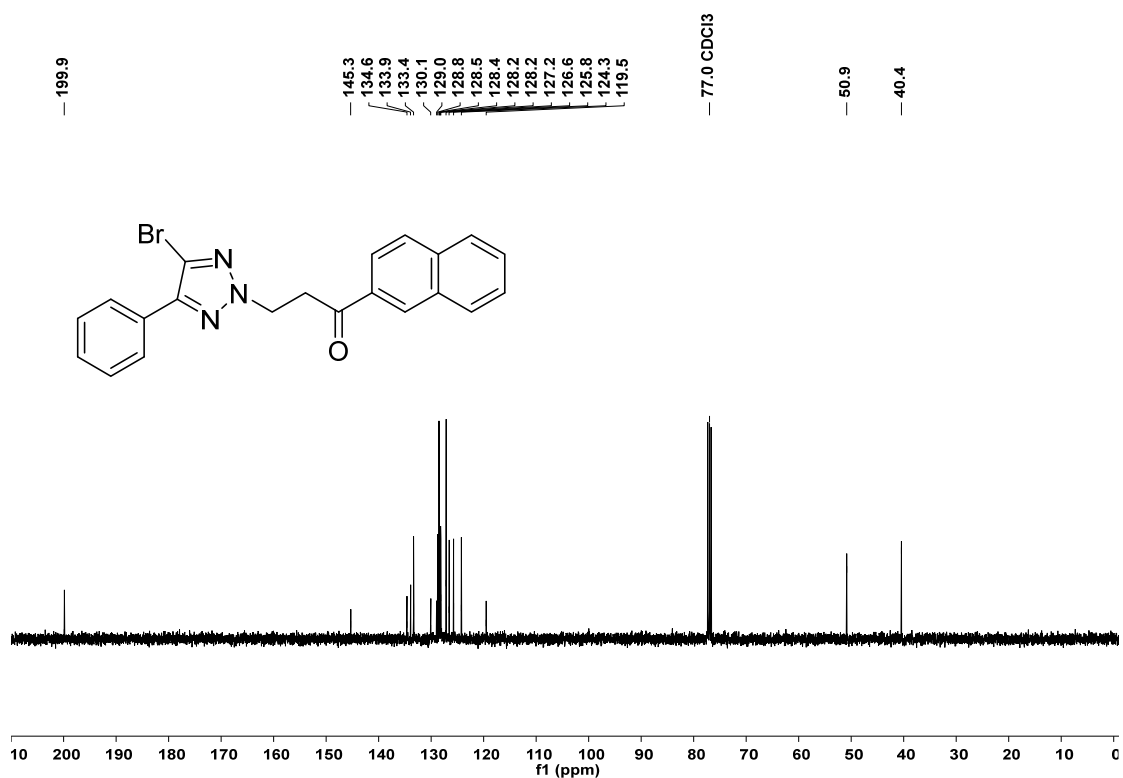



3-(4-benzoyl-5-phenyl-2H-1,2,3-triazol-2-yl)-1-phenylpropan-1-one (4e)

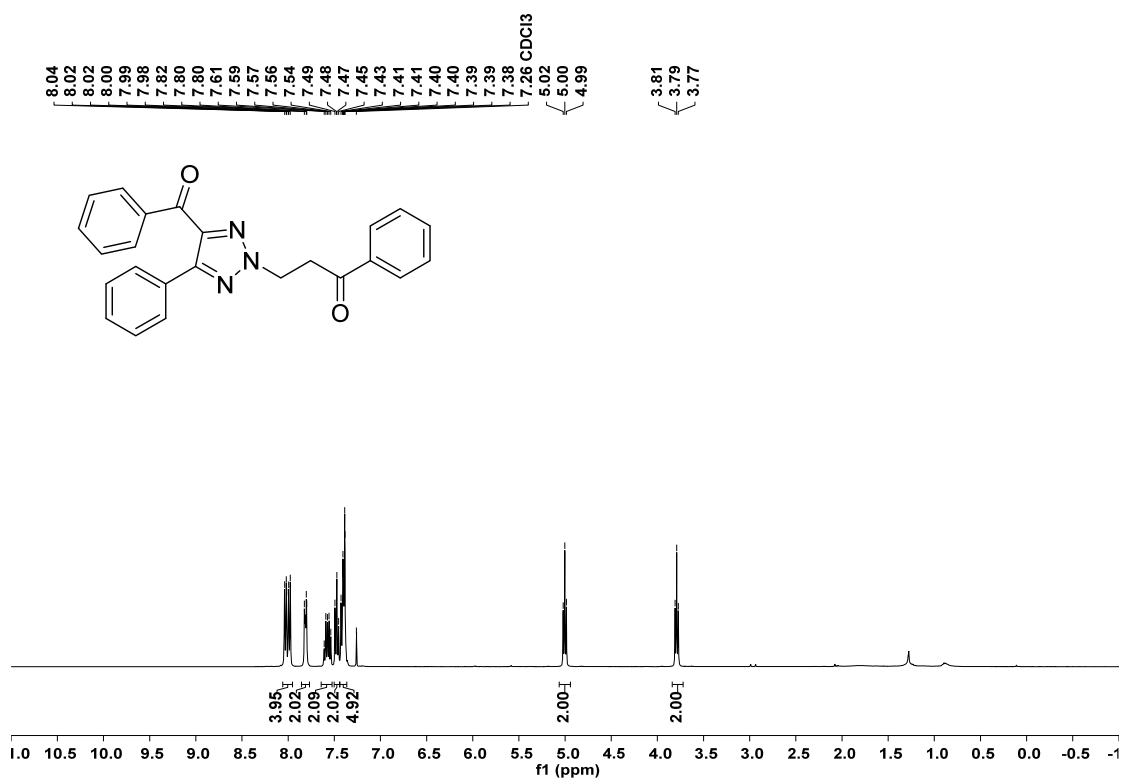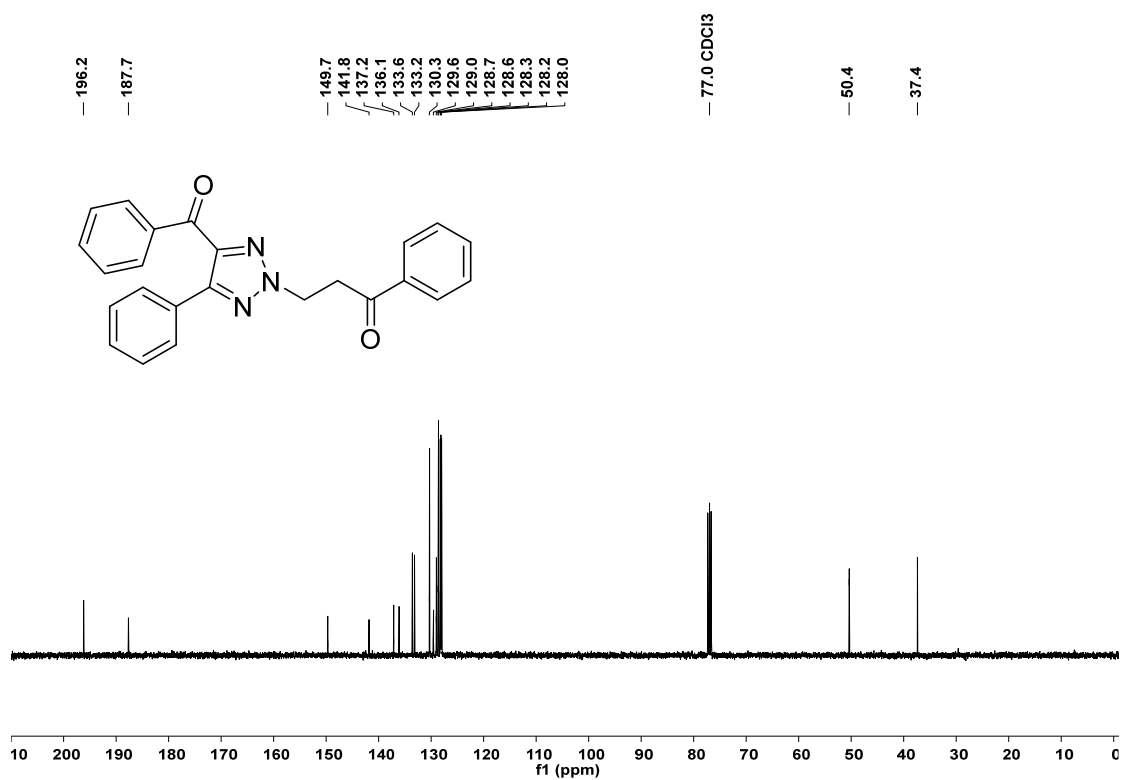

3-(4-nitro-5-phenyl-2H-1,2,3-triazol-2-yl)-1-phenylpropan-1-one (4f)

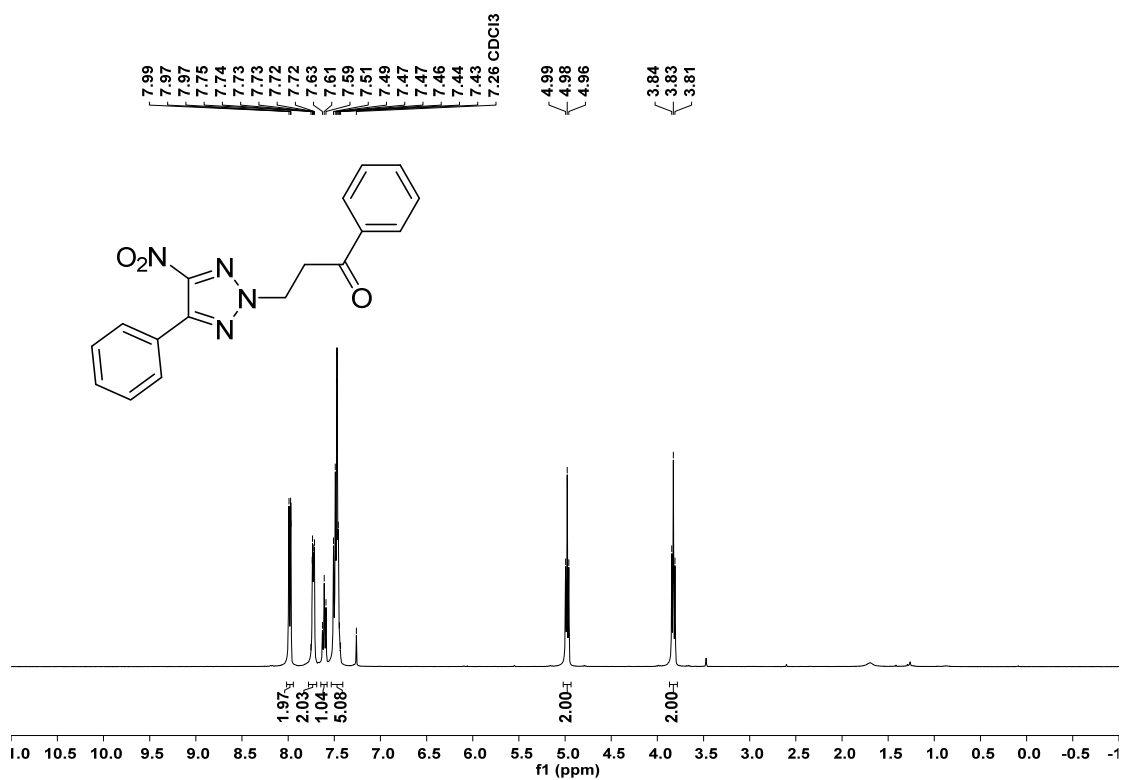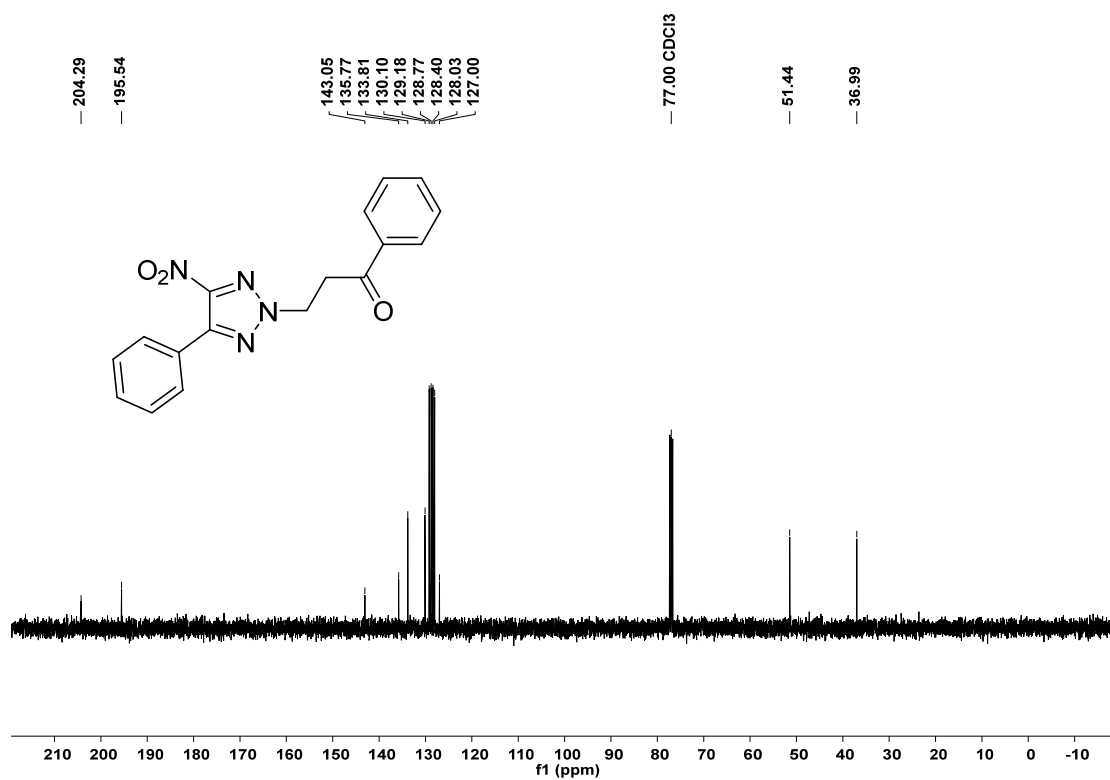

3-(4-chloro-5-phenyl-2H-1,2,3-triazol-2-yl)-1-phenylpropan-1-one (**4g**)

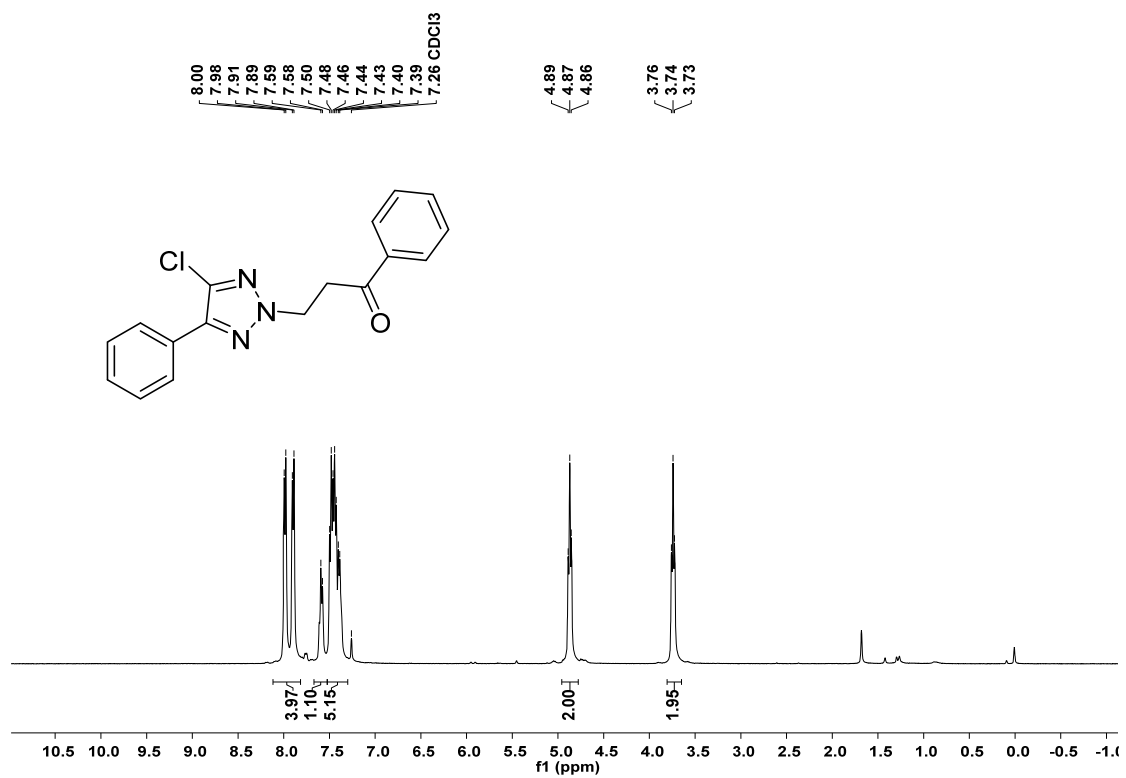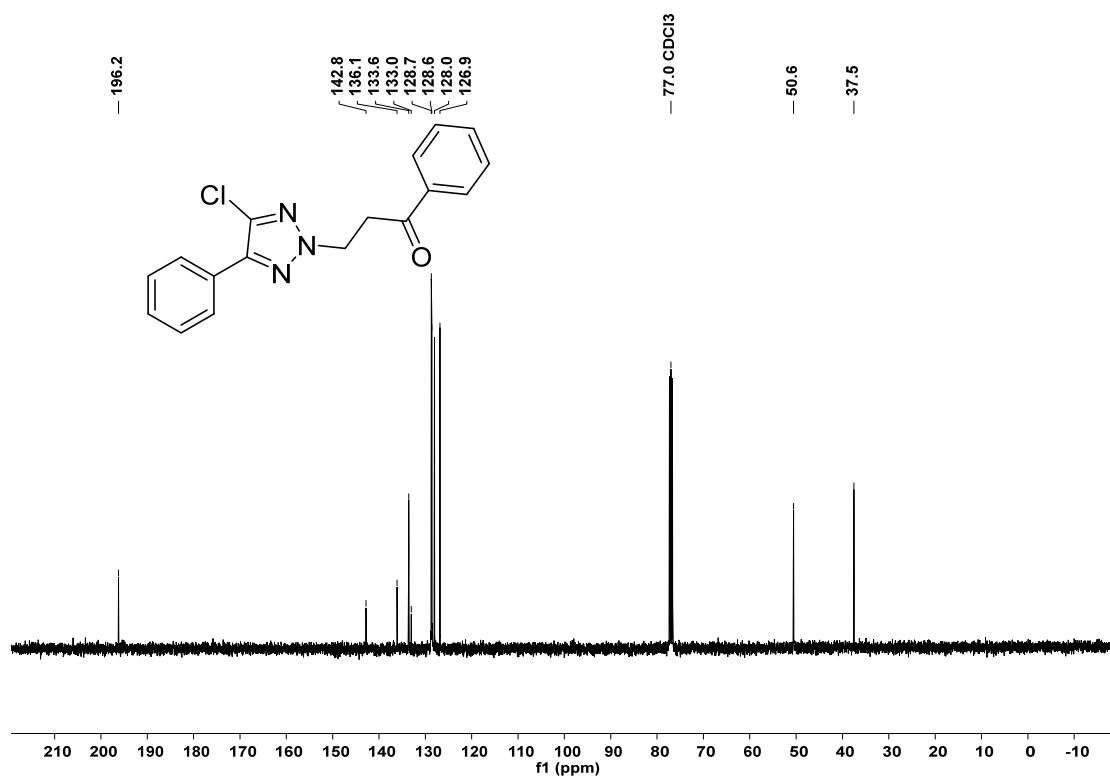

2-(3-oxo-3-phenylpropyl)-5-phenyl-2H-1,2,3-triazole-4-carbonitrile (**4h**)

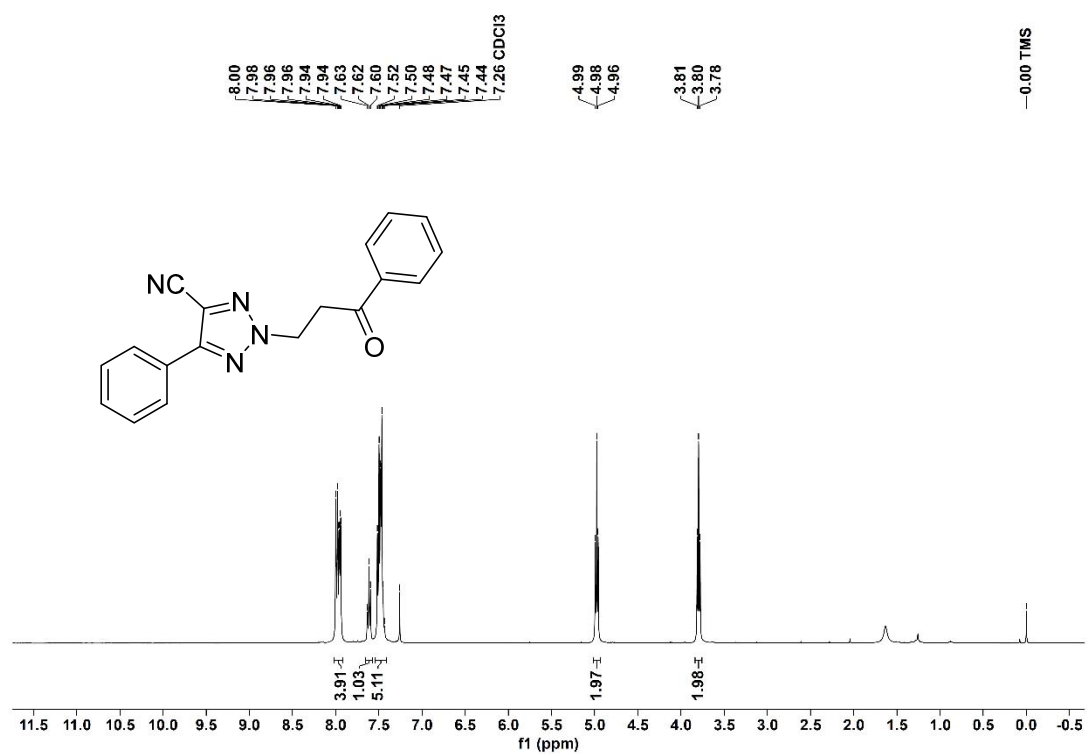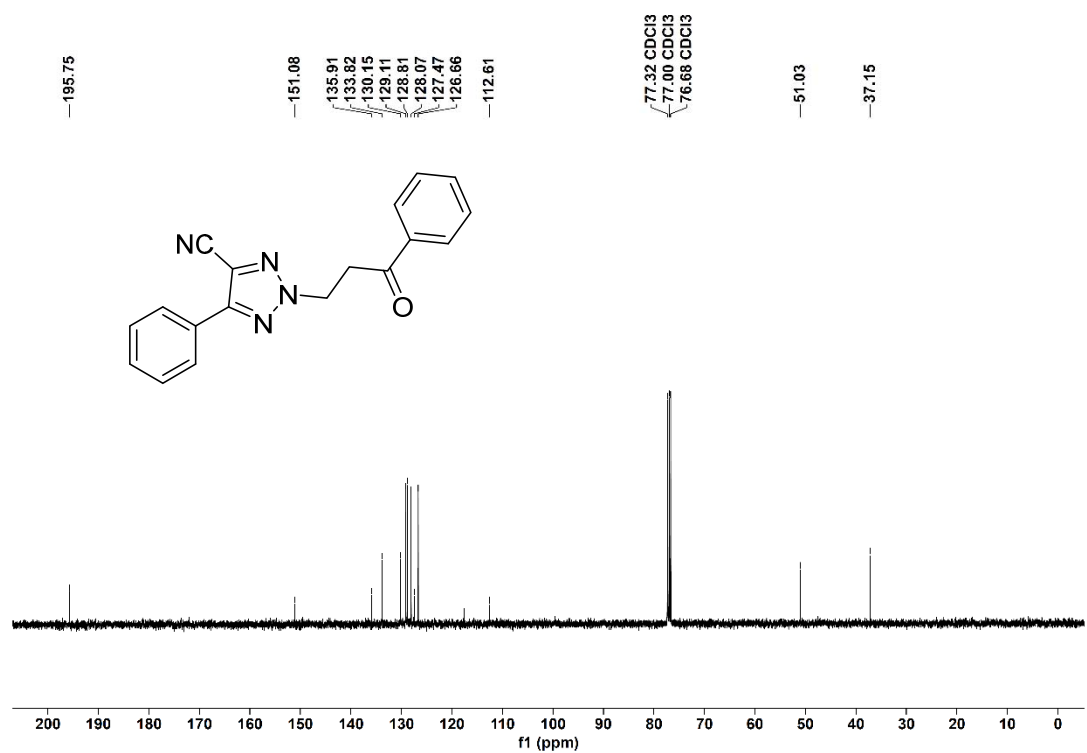

3-(4-iodo-5-phenyl-2H-1,2,3-triazol-2-yl)-1-phenylpropan-1-one (**4i**)

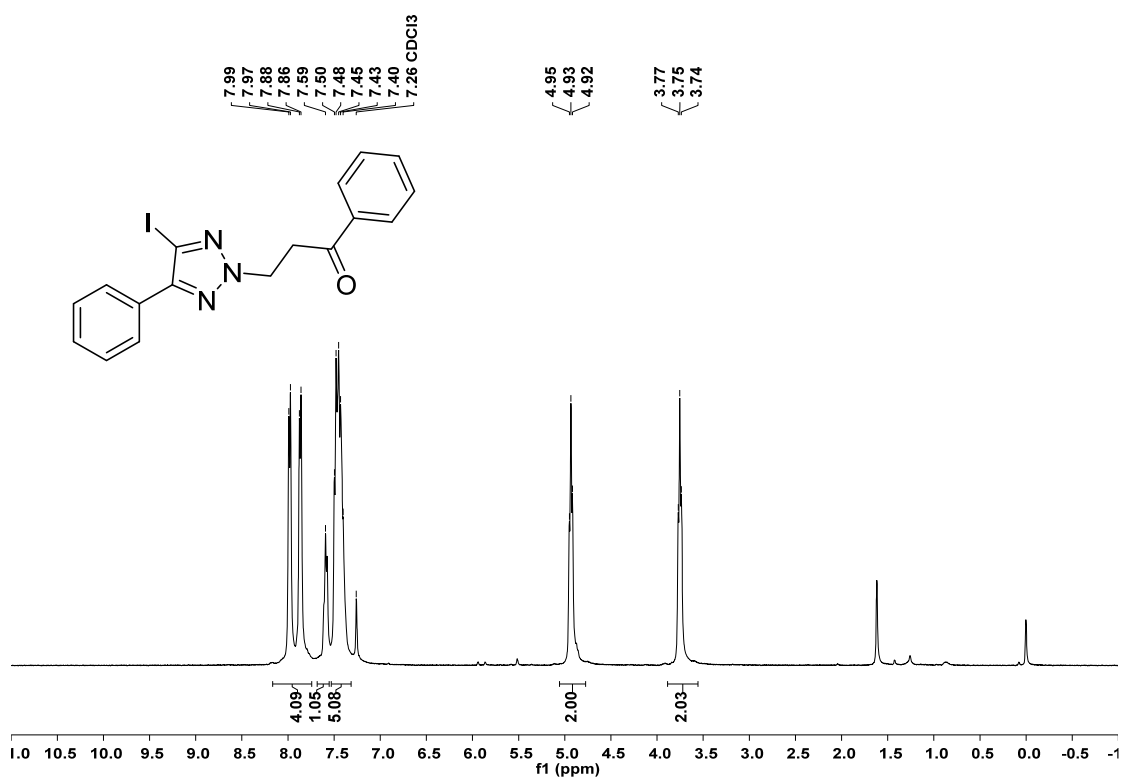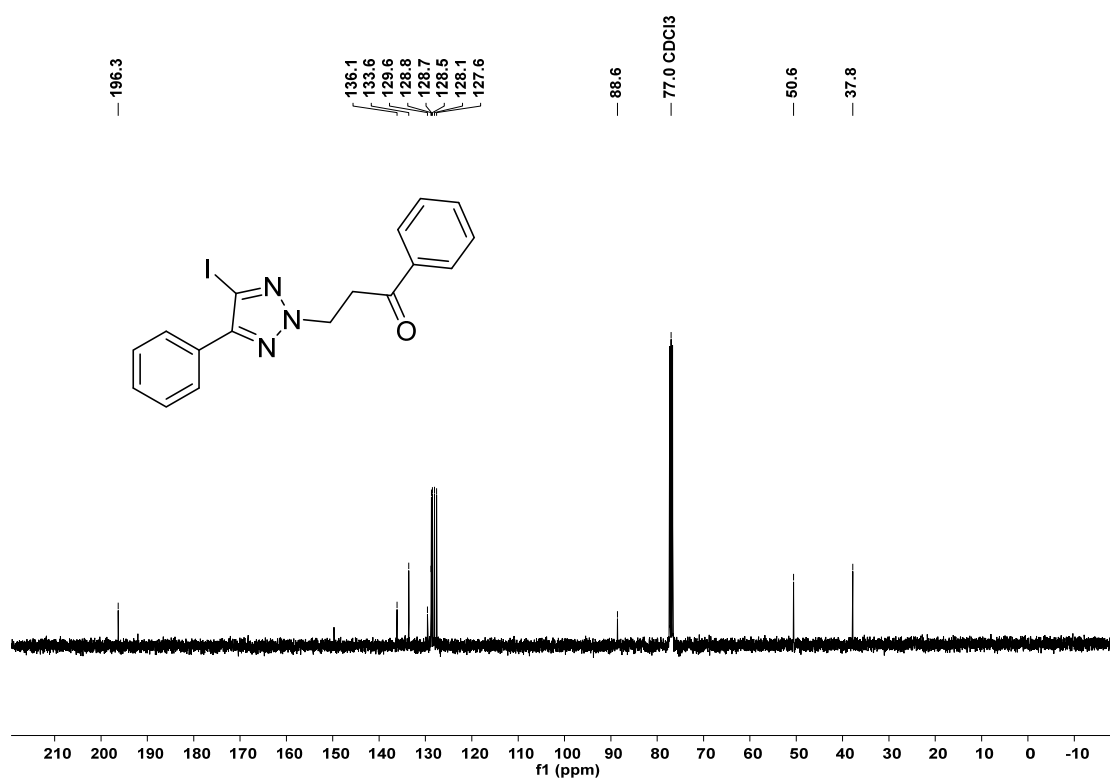

1-phenyl-3-(4-phenyl-5-(trifluoromethyl)-2H-1,2,3-triazol-2-yl)propan-1-one (4j)

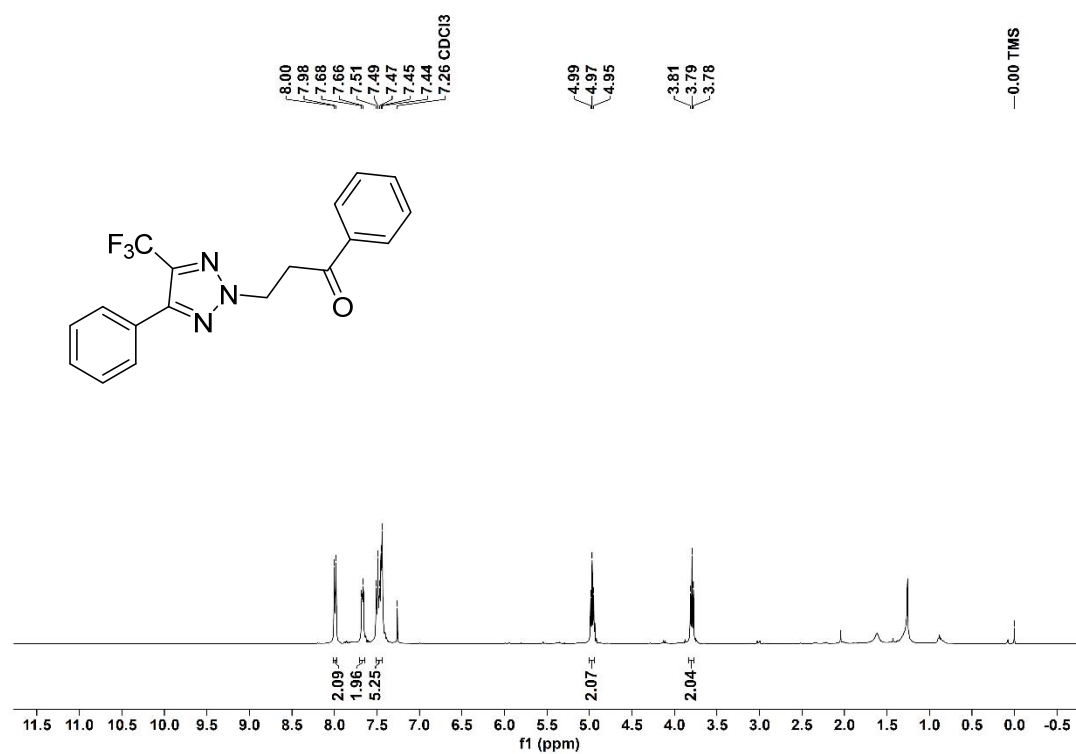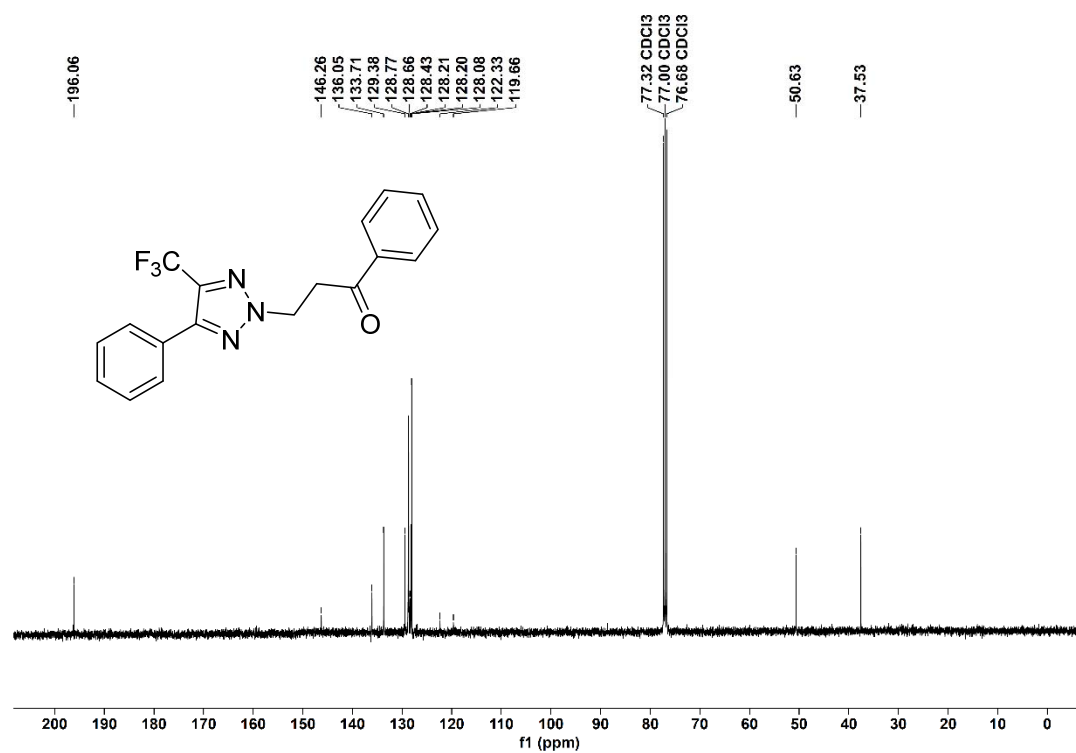

ethyl 2-(3-oxo-3-phenylpropyl)-5-phenyl-2H-1,2,3-triazole-4-carboxylate (**4k**)

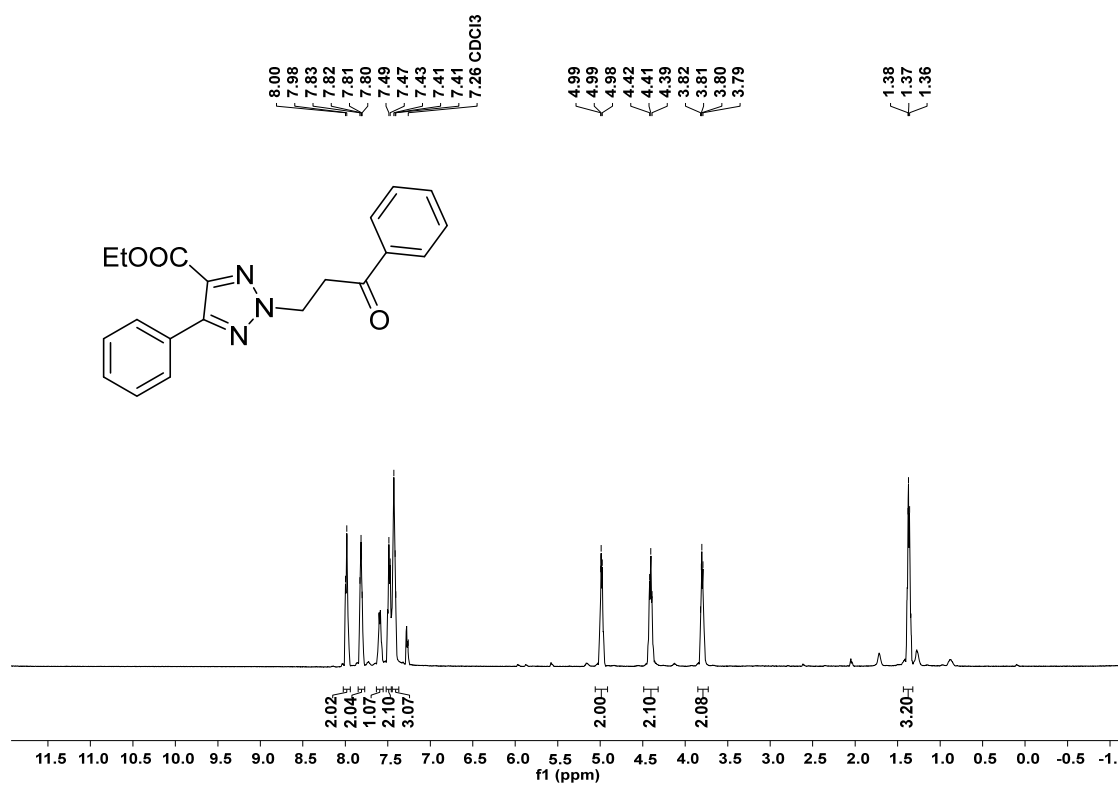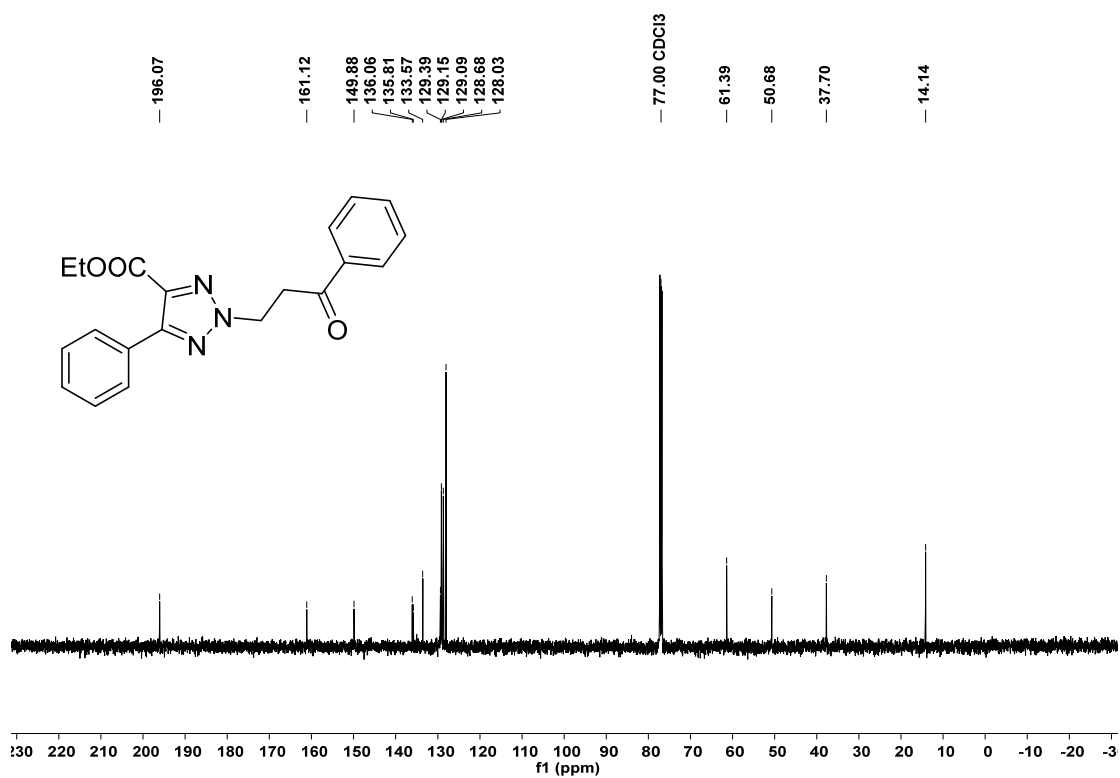

ethyl 5-(2-nitrophenyl)-2-(3-oxo-3-phenylpropyl)-2H-1,2,3-triazole-4-carboxylate (**41**)

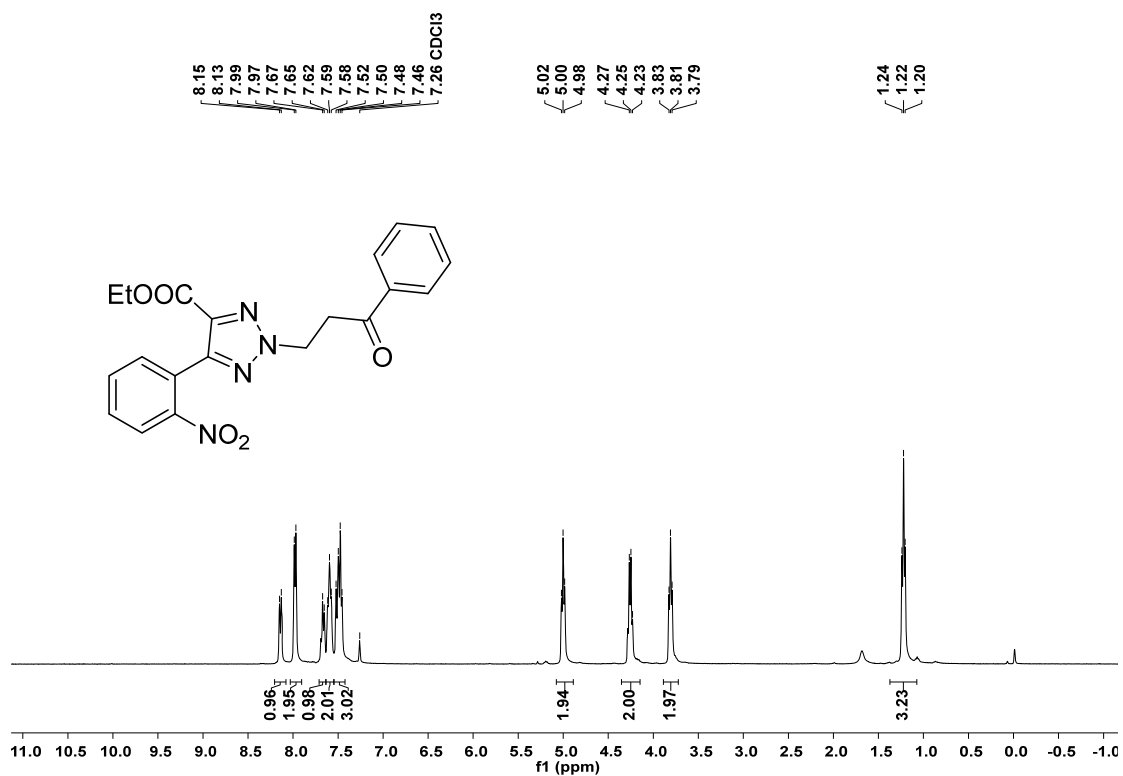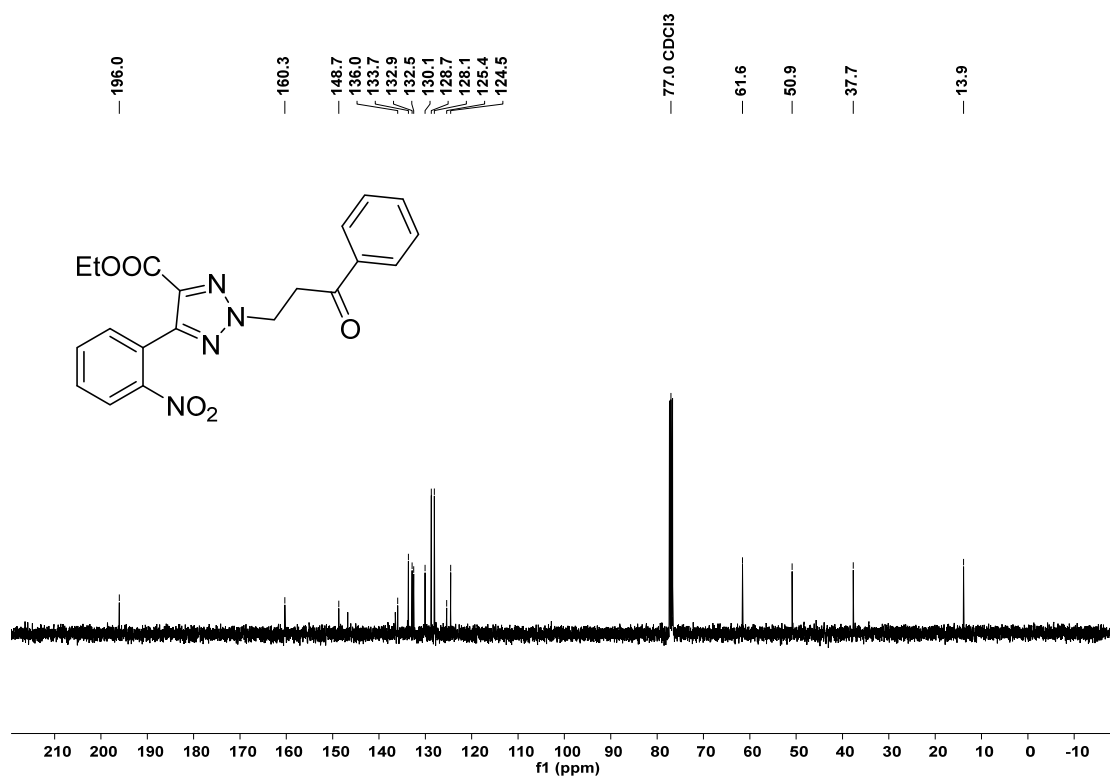



3-(4-(ethylsulfonyl)-5-phenyl-2H-1,2,3-triazol-2-yl)-1-phenylpropan-1-one (**4m**)

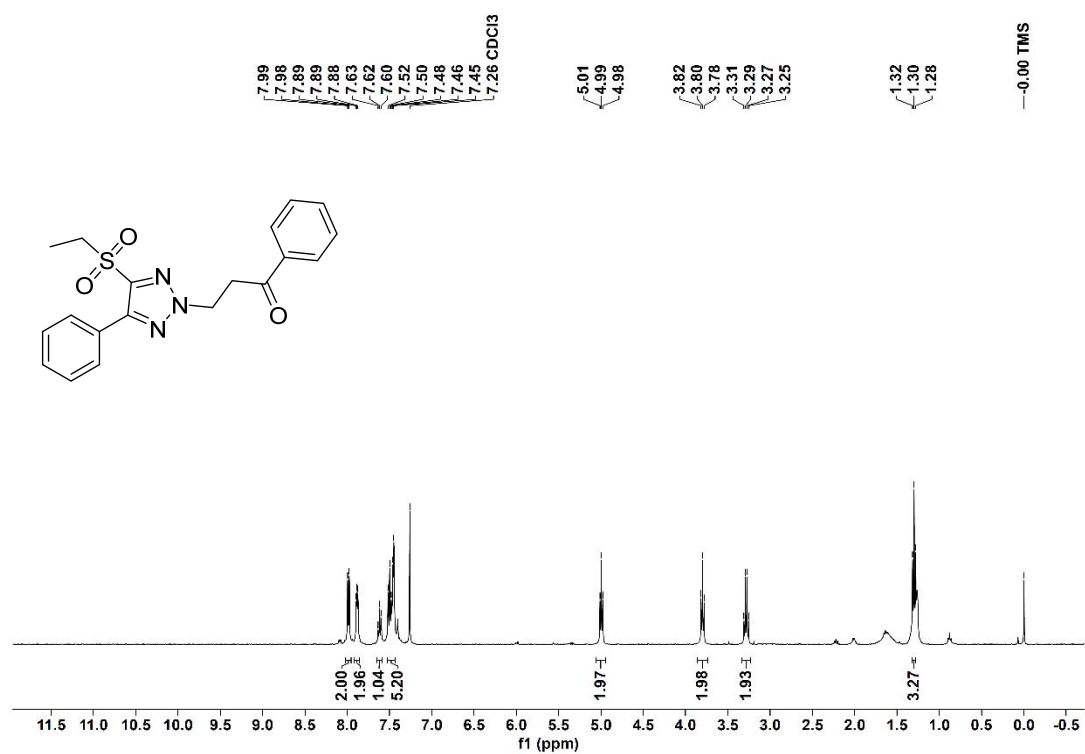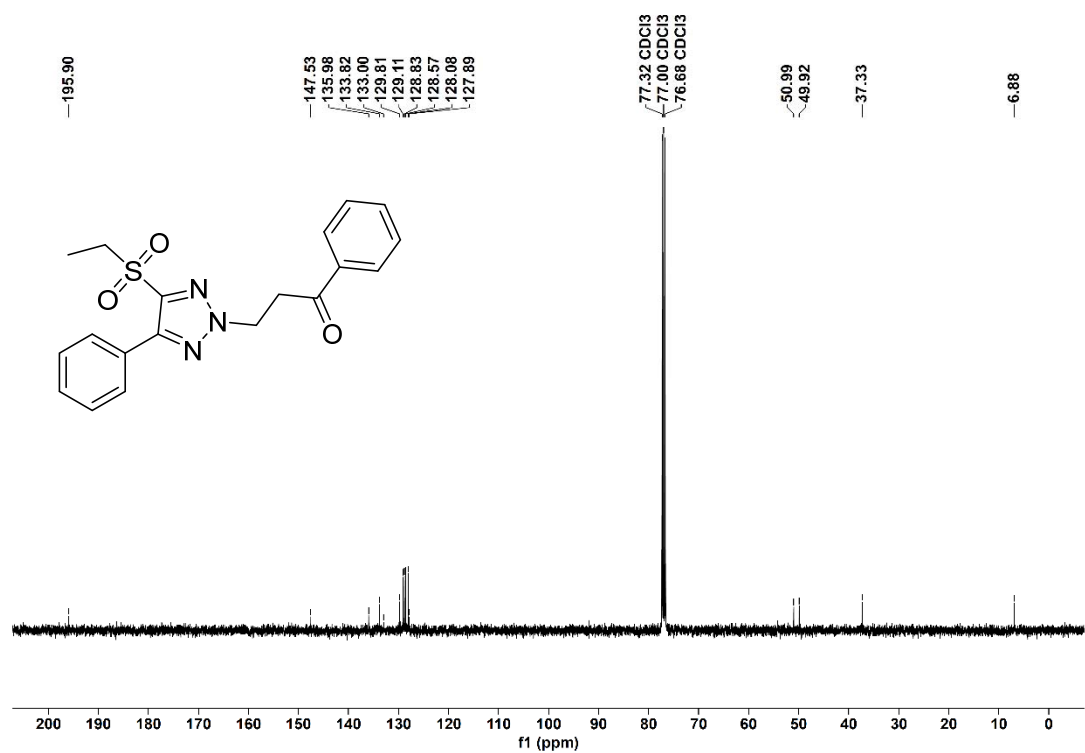

N-((4,5-diphenyl-2H-1,2,3-triazol-2-yl)methyl)-N-methylformamide (5)

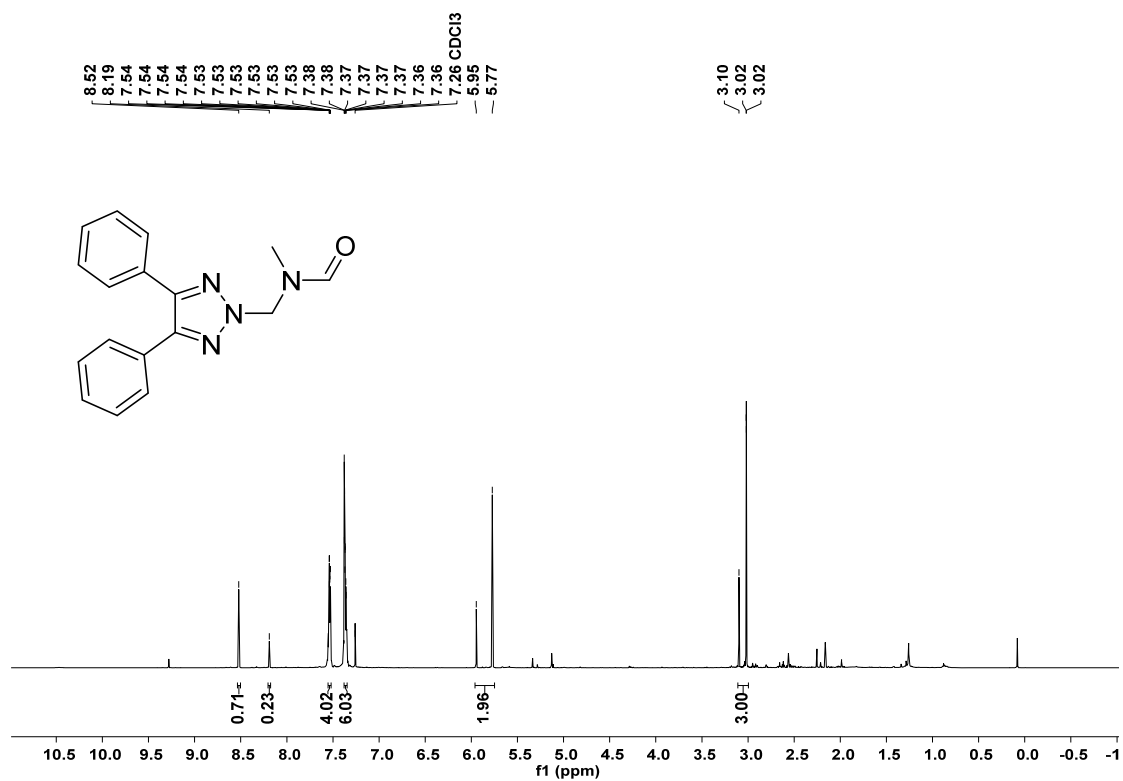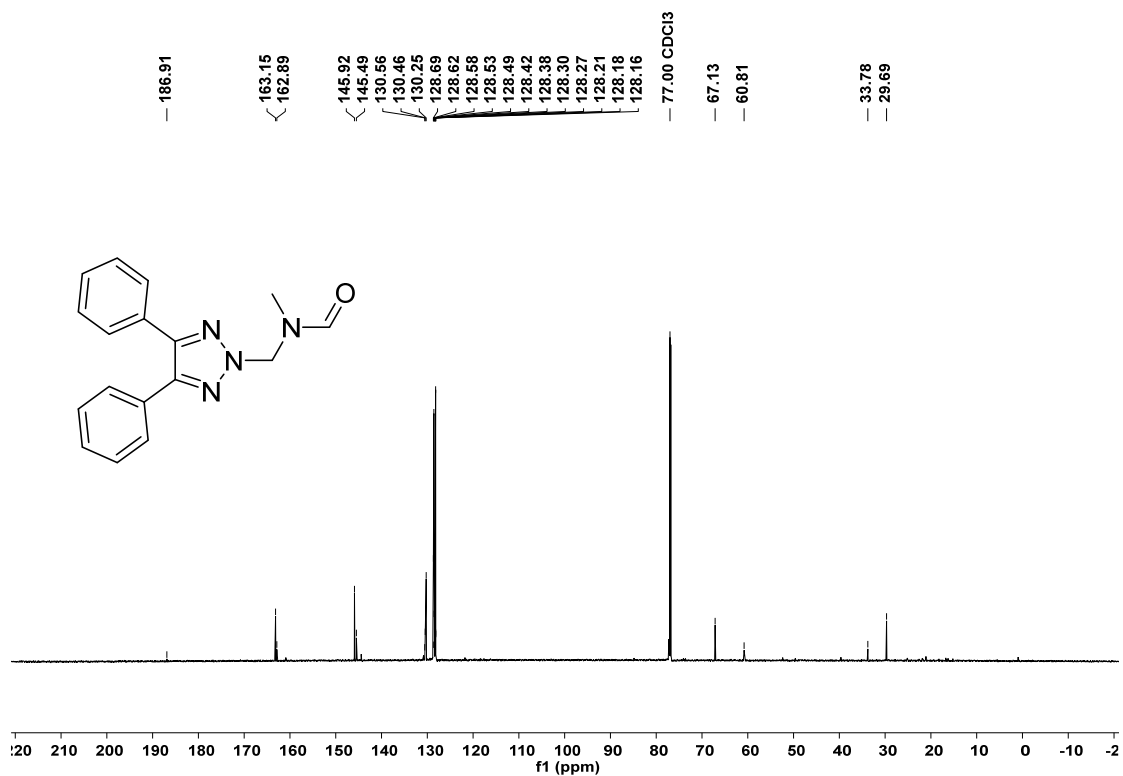

1-phenylprop-2-en-1-one (6)

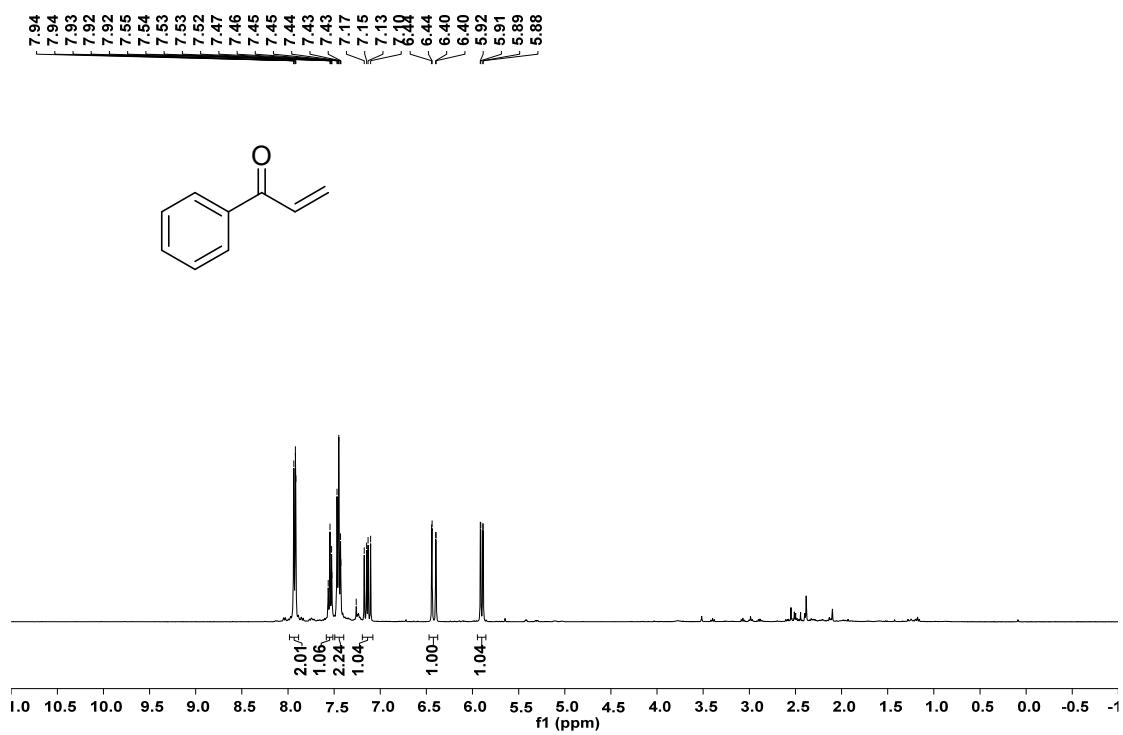

1-(4-bromophenyl)-3-(4-phenyl-2H-1,2,3-triazol-2-yl)propan-1-ol (9)

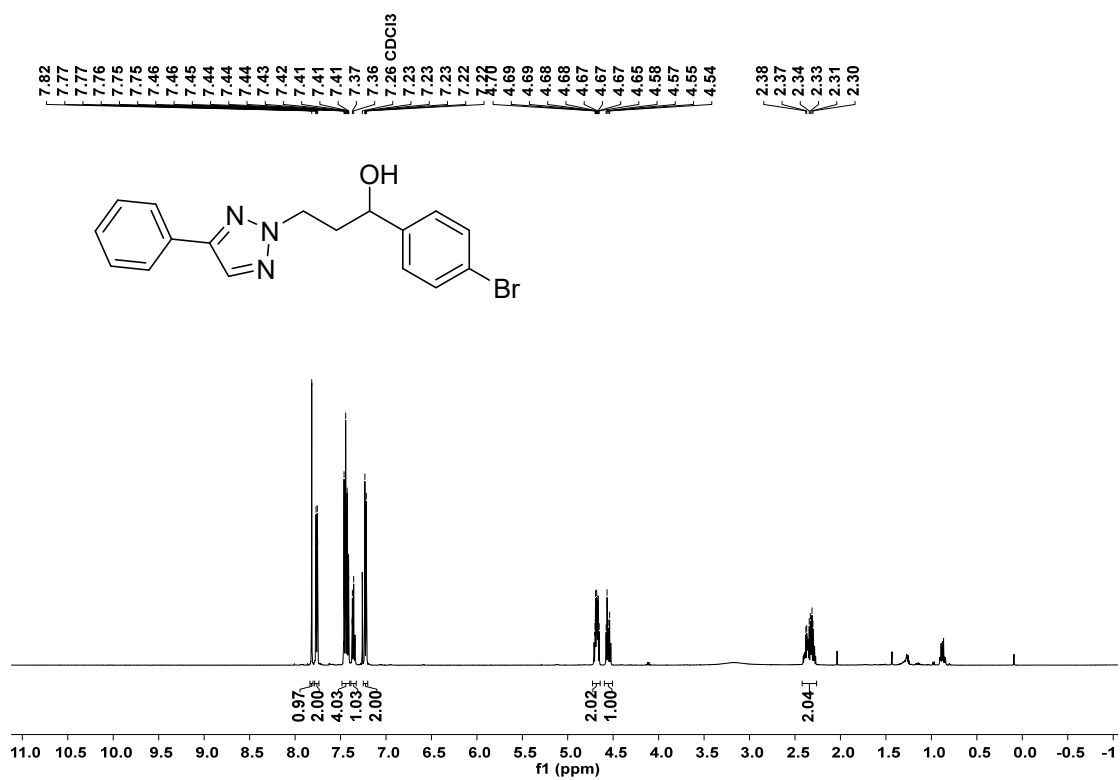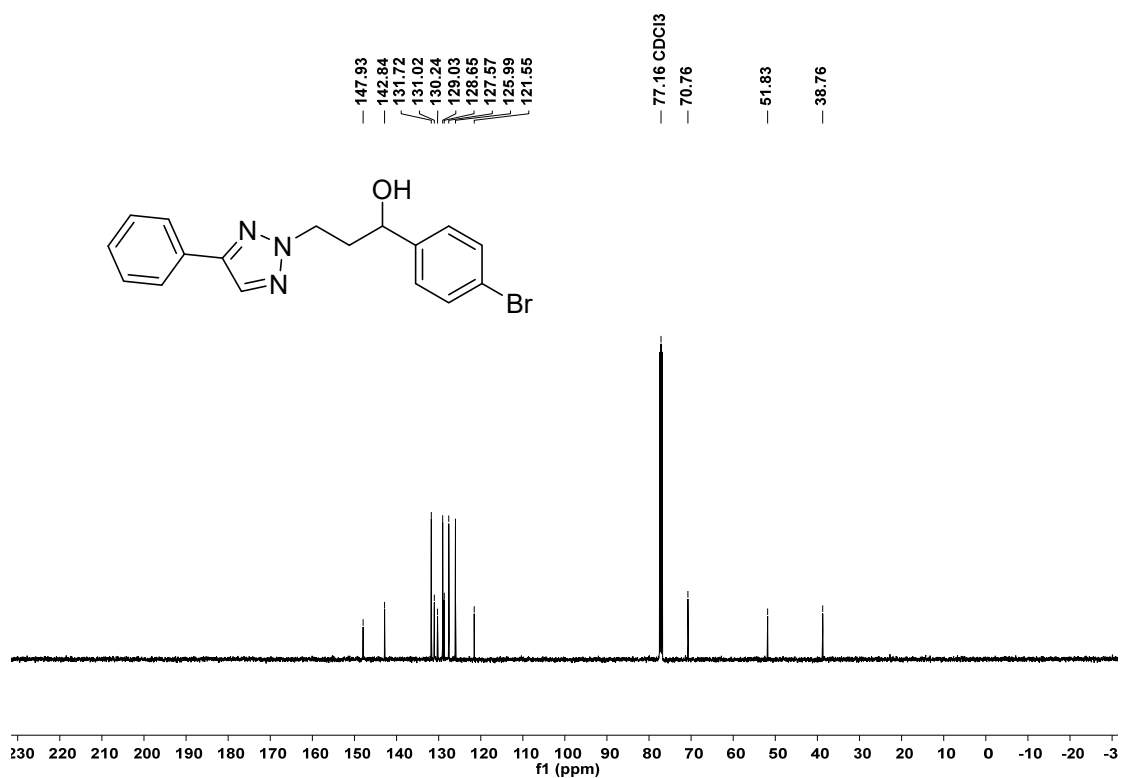

2-(3,3-diphenylpropyl)-4,5-diphenyl-2H-1,2,3-triazole (**10**)

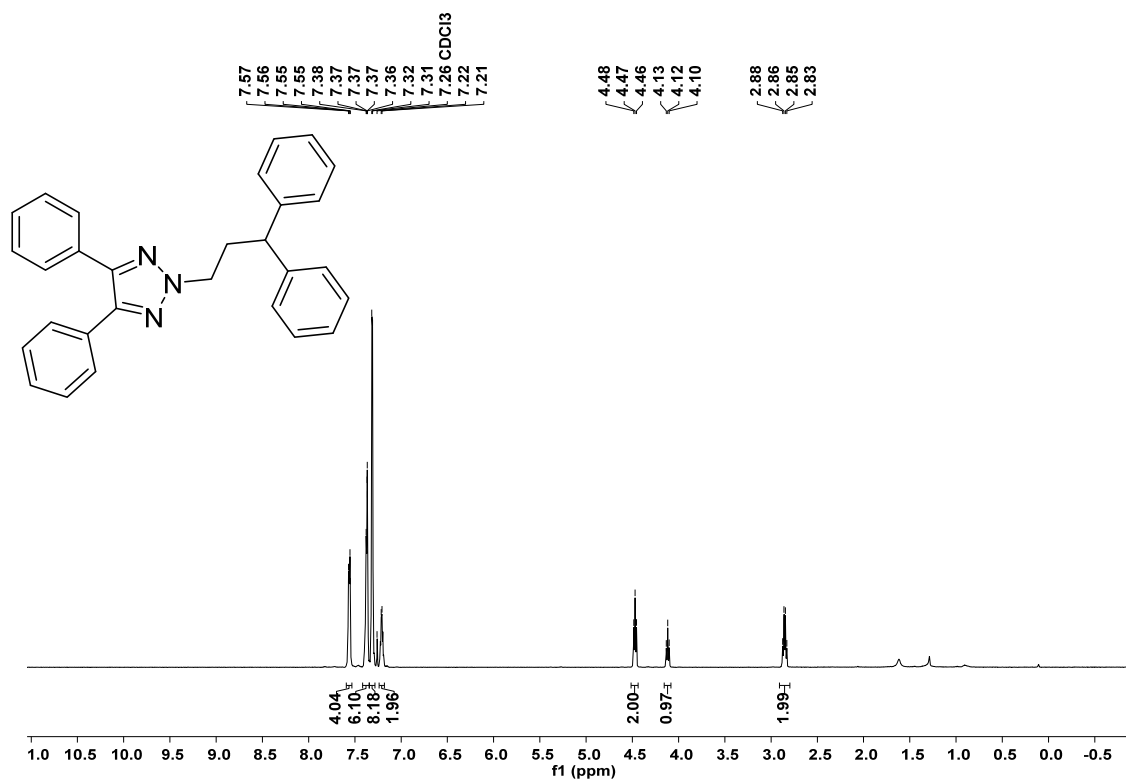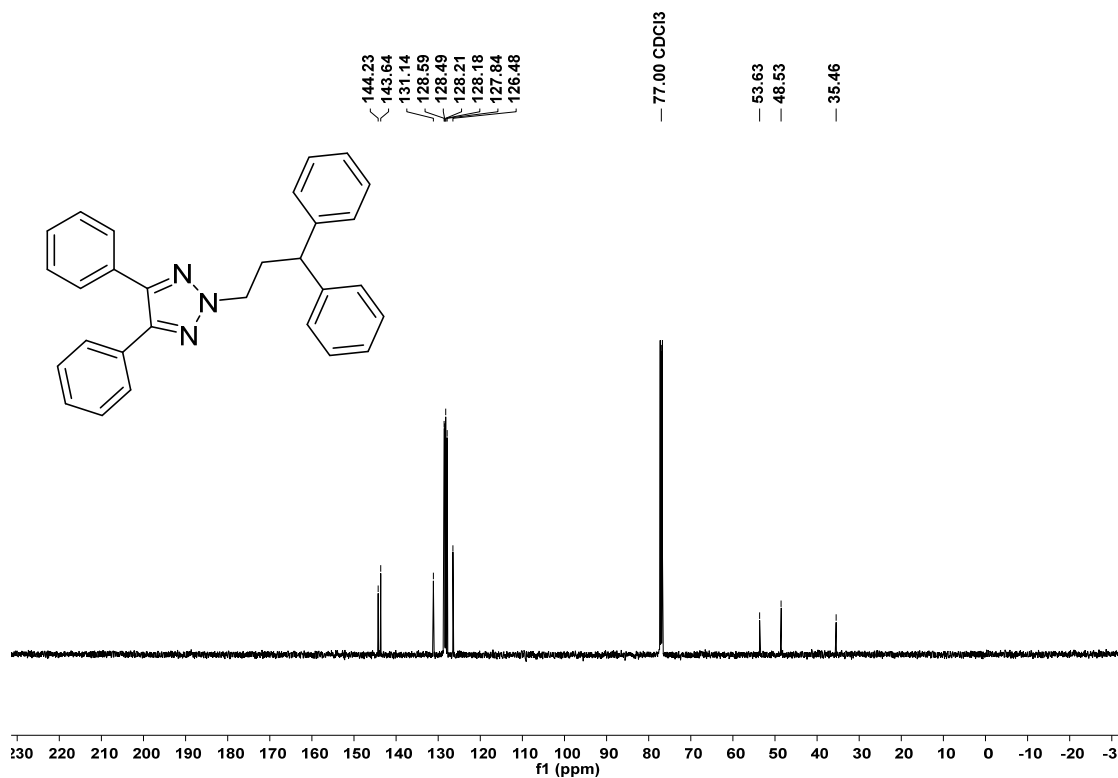

Supplement: d4ob00207e1.pdf [file d4ob00207e1.pdf]
